# Supplementary material
Source: PubMed Central journal article supplement (PMC4560965)
Supplement: NIHMS695746-supplement-supplement_1.pdf [file NIHMS695746-supplement-supplement_1.pdf]

**Supplementary Table 1.** Cross-correlations ( $r$ ) for the relationships between each parameter. N1 and N2 represent the number of patients with the assessed measure.

| <b>Parameter 1</b>               | <b>N1</b> | <b>Parameter 2</b>                       | <b>N2</b> | <b>r</b> |
|----------------------------------|-----------|------------------------------------------|-----------|----------|
| AD in Final Diagnosis            | 10        | Age of Death                             | 46        | 0.35     |
| AD in Final Diagnosis            | 10        | Onset Age                                | 46        | 0.32     |
| AD in Final Diagnosis            | 10        | Diagnosis Age                            | 46        | 0.31     |
| AD in Final Diagnosis            | 10        | Brain Mass                               | 46        | -0.15    |
| AD in Final Diagnosis            | 10        | Diagnostic Delay                         | 46        | -0.12    |
| AD in Final Diagnosis            | 10        | Disease Duration                         | 46        | -0.06    |
| AD in Final Diagnosis            | 10        | Gender (1 = m, 2 = f)                    | 46        | 0.03     |
| Age of Death                     | 46        | Gender (1 = m, 2 = f)                    | 46        | -0.01    |
| Amygdala Neurofibrillary Tangles | 20        | Hippocampus Neurofibrillary Tangles      | 17        | 0.60     |
| Amygdala Neurofibrillary Tangles | 20        | AD in Final Diagnosis                    | 10        | 0.44     |
| Amygdala Neurofibrillary Tangles | 20        | FTLD in Final Diagnosis                  | 12        | 0.36     |
| Amygdala Neurofibrillary Tangles | 20        | Loss Purkinje Cells                      | 39        | 0.35     |
| Amygdala Neurofibrillary Tangles | 20        | Locus Ceruleus Pigmentary Incontinence   | 35        | 0.34     |
| Amygdala Neurofibrillary Tangles | 20        | Onset Age                                | 46        | 0.25     |
| Amygdala Neurofibrillary Tangles | 20        | Diagnosis Age                            | 46        | 0.24     |
| Amygdala Neurofibrillary Tangles | 20        | Age of Death                             | 46        | 0.24     |
| Amygdala Neurofibrillary Tangles | 20        | Loss of Neurons Spinal Cord              | 11        | 0.24     |
| Amygdala Neurofibrillary Tangles | 20        | Gender (1 = m, 2 = f)                    | 46        | 0.22     |
| Amygdala Neurofibrillary Tangles | 20        | Denervation                              | 31        | 0.22     |
| Amygdala Neurofibrillary Tangles | 20        | Familial ALS                             | 1         | 0.21     |
| Amygdala Neurofibrillary Tangles | 20        | Loss of Neurons Locus Ceruleus           | 6         | -0.18    |
| Amygdala Neurofibrillary Tangles | 20        | Diaphragm Atrophy                        | 25        | 0.18     |
| Amygdala Neurofibrillary Tangles | 20        | Substantia Nigra Pigmentary Incontinence | 32        | 0.18     |
| Amygdala Neurofibrillary Tangles | 20        | Lewy Body Formation                      | 5         | 0.17     |
| Amygdala Neurofibrillary Tangles | 20        | Ventral Nerve Roots Atrophy              | 30        | 0.16     |
| Amygdala Neurofibrillary Tangles | 20        | Brain Mass                               | 46        | -0.16    |
| Amygdala Neurofibrillary Tangles | 20        | Disease Duration                         | 46        | -0.15    |

|                                           |    |                                           |    |       |
|-------------------------------------------|----|-------------------------------------------|----|-------|
| Amygdala Neurofibrillary Tangles          | 20 | Loss of Neurons Dentate Nucleus           | 8  | 0.15  |
| Amygdala Neurofibrillary Tangles          | 20 | Betz Cell Loss                            | 35 | 0.13  |
| Amygdala Neurofibrillary Tangles          | 20 | Infarcts                                  | 1  | -0.11 |
| Amygdala Neurofibrillary Tangles          | 20 | Loss of Neurons Gyrus                     | 1  | -0.11 |
| Amygdala Neurofibrillary Tangles          | 20 | Microinfarcts                             | 3  | -0.10 |
| Amygdala Neurofibrillary Tangles          | 20 | Paraspinal Muscle Fiber Atrophy           | 26 | 0.10  |
| Amygdala Neurofibrillary Tangles          | 20 | Lewy Body Disease in Final Diagnosis      | 2  | 0.07  |
| Amygdala Neurofibrillary Tangles          | 20 | Lateral Corticospinal Tract Degeneration  | 41 | -0.06 |
| Amygdala Neurofibrillary Tangles          | 20 | Diagnostic Delay                          | 46 | -0.05 |
| Amygdala Neurofibrillary Tangles          | 20 | Loss of Neurons Amygdala                  | 2  | 0.05  |
| Amygdala Neurofibrillary Tangles          | 20 | Loss of Neurons Medulla                   | 15 | -0.03 |
| Amygdala Neurofibrillary Tangles          | 20 | Anterior Corticospinal Tract Degeneration | 33 | -0.03 |
| Amygdala Neurofibrillary Tangles          | 20 | Loss of Neurons Anterior Horns            | 20 | 0.02  |
| Amygdala Neurofibrillary Tangles          | 20 | FTD in Final Diagnosis                    | 3  | 0.02  |
| Amygdala Neurofibrillary Tangles          | 20 | Tau Pathology/Tauopathy                   | 8  | -0.01 |
| Amygdala Neurofibrillary Tangles          | 20 | Loss of Neurons Substantia Nigra          | 6  | 0.01  |
| Anterior Corticospinal Tract Degeneration | 33 | Lateral Corticospinal Tract Degeneration  | 41 | 0.82  |
| Anterior Corticospinal Tract Degeneration | 33 | Betz Cell Loss                            | 35 | 0.44  |
| Anterior Corticospinal Tract Degeneration | 33 | FTD in Final Diagnosis                    | 3  | -0.35 |
| Anterior Corticospinal Tract Degeneration | 33 | AD in Final Diagnosis                     | 10 | 0.31  |
| Anterior Corticospinal Tract Degeneration | 33 | Locus Ceruleus Pigmentary Incontinence    | 35 | 0.27  |
| Anterior Corticospinal Tract Degeneration | 33 | Loss Purkinje Cells                       | 39 | 0.25  |
| Anterior Corticospinal Tract Degeneration | 33 | Diagnostic Delay                          | 46 | -0.24 |
| Anterior Corticospinal Tract Degeneration | 33 | Loss of Neurons Locus Ceruleus            | 6  | 0.24  |

|                                           |    |                                          |    |       |
|-------------------------------------------|----|------------------------------------------|----|-------|
| Anterior Corticospinal Tract Degeneration | 33 | FTLD in Final Diagnosis                  | 12 | -0.23 |
| Anterior Corticospinal Tract Degeneration | 33 | Ventral Nerve Roots Atrophy              | 30 | 0.22  |
| Anterior Corticospinal Tract Degeneration | 33 | Familial ALS                             | 1  | -0.20 |
| Anterior Corticospinal Tract Degeneration | 33 | Lewy Body Disease in Final Diagnosis     | 2  | 0.19  |
| Anterior Corticospinal Tract Degeneration | 33 | Loss of Neurons Anterior Horns           | 20 | -0.17 |
| Anterior Corticospinal Tract Degeneration | 33 | Diagnosis Age                            | 46 | -0.16 |
| Anterior Corticospinal Tract Degeneration | 33 | Loss of Neurons Substantia Nigra         | 6  | 0.16  |
| Anterior Corticospinal Tract Degeneration | 33 | Loss of Neurons Dentate Nucleus          | 8  | 0.16  |
| Anterior Corticospinal Tract Degeneration | 33 | Loss of Neurons Medulla                  | 15 | 0.15  |
| Anterior Corticospinal Tract Degeneration | 33 | Brain Mass                               | 46 | -0.14 |
| Anterior Corticospinal Tract Degeneration | 33 | Disease Duration                         | 46 | 0.14  |
| Anterior Corticospinal Tract Degeneration | 33 | Lewy Body Formation                      | 5  | 0.13  |
| Anterior Corticospinal Tract Degeneration | 33 | Onset Age                                | 46 | -0.13 |
| Anterior Corticospinal Tract Degeneration | 33 | Tau Pathology/Tauopathy                  | 8  | 0.13  |
| Anterior Corticospinal Tract Degeneration | 33 | Age of Death                             | 46 | -0.11 |
| Anterior Corticospinal Tract Degeneration | 33 | Loss of Neurons Spinal Cord              | 11 | -0.09 |
| Anterior Corticospinal Tract Degeneration | 33 | Diaphragm Atrophy                        | 25 | -0.09 |
| Anterior Corticospinal Tract Degeneration | 33 | Substantia Nigra Pigmentary Incontinence | 32 | 0.07  |
| Anterior Corticospinal Tract Degeneration | 33 | Paraspinal Muscle Fiber Atrophy          | 26 | 0.06  |
| Anterior Corticospinal Tract Degeneration | 33 | Gender (1 = m, 2 = f)                    | 46 | 0.05  |
| Anterior Corticospinal Tract Degeneration | 33 | Denervation                              | 31 | 0.04  |
| Anterior Corticospinal Tract Degeneration | 33 | Loss of Neurons Amygdala                 | 2  | 0.03  |
| Anterior Corticospinal Tract Degeneration | 33 | Infarcts                                 | 1  | 0.02  |
| Anterior Corticospinal Tract Degeneration | 33 | Loss of Neurons Gyrus                    | 1  | 0.02  |

|                                             |    |                                           |    |       |
|---------------------------------------------|----|-------------------------------------------|----|-------|
| Anterior Corticospinal Tract Degeneration   | 33 | Microinfarcts                             | 3  | 0.00  |
| Anterior Horn Cells Neurofibrillary Tangles | 2  | Gender (1 = m, 2 = f)                     | 46 | 0.26  |
| Anterior Horn Cells Neurofibrillary Tangles | 2  | Locus Ceruleus Pigmentary Incontinence    | 35 | -0.26 |
| Anterior Horn Cells Neurofibrillary Tangles | 2  | Diaphragm Atrophy                         | 25 | -0.20 |
| Anterior Horn Cells Neurofibrillary Tangles | 2  | Paraspinal Muscle Fiber Atrophy           | 26 | -0.20 |
| Anterior Horn Cells Neurofibrillary Tangles | 2  | Denervation                               | 31 | -0.20 |
| Anterior Horn Cells Neurofibrillary Tangles | 2  | Brain Mass                                | 46 | -0.18 |
| Anterior Horn Cells Neurofibrillary Tangles | 2  | Lateral Corticospinal Tract Degeneration  | 41 | -0.17 |
| Anterior Horn Cells Neurofibrillary Tangles | 2  | Loss of Neurons Anterior Horns            | 20 | 0.15  |
| Anterior Horn Cells Neurofibrillary Tangles | 2  | Nucleus Basalis Neurofibrillary Tangles   | 20 | -0.15 |
| Anterior Horn Cells Neurofibrillary Tangles | 2  | Betz Cell Loss                            | 35 | -0.15 |
| Anterior Horn Cells Neurofibrillary Tangles | 2  | Diagnostic Delay                          | 46 | -0.14 |
| Anterior Horn Cells Neurofibrillary Tangles | 2  | Disease Duration                          | 46 | -0.14 |
| Anterior Horn Cells Neurofibrillary Tangles | 2  | Loss of Neurons Medulla                   | 15 | -0.13 |
| Anterior Horn Cells Neurofibrillary Tangles | 2  | Age of Death                              | 46 | -0.13 |
| Anterior Horn Cells Neurofibrillary Tangles | 2  | Substantia Nigra Pigmentary Incontinence  | 32 | -0.13 |
| Anterior Horn Cells Neurofibrillary Tangles | 2  | Locus Ceruleus Neurofibrillary Tangles    | 14 | -0.12 |
| Anterior Horn Cells Neurofibrillary Tangles | 2  | FTLD in Final Diagnosis                   | 12 | -0.12 |
| Anterior Horn Cells Neurofibrillary Tangles | 2  | Diagnosis Age                             | 46 | -0.11 |
| Anterior Horn Cells Neurofibrillary Tangles | 2  | Loss of Neurons Spinal Cord               | 11 | -0.11 |
| Anterior Horn Cells Neurofibrillary Tangles | 2  | Anterior Corticospinal Tract Degeneration | 33 | -0.10 |
| Anterior Horn Cells Neurofibrillary Tangles | 2  | Hypothalamus Neurofibrillary Tangles      | 10 | -0.10 |
| Anterior Horn Cells Neurofibrillary Tangles | 2  | Insular Cortex Neurofibrillary Tangles    | 10 | -0.09 |
| Anterior Horn Cells Neurofibrillary Tangles | 2  | Tau Pathology/Tauopathy                   | 8  | -0.09 |

|                                             |   |                                                       |    |       |
|---------------------------------------------|---|-------------------------------------------------------|----|-------|
| Anterior Horn Cells Neurofibrillary Tangles | 2 | Loss of Neurons Dentate Nucleus                       | 8  | -0.09 |
| Anterior Horn Cells Neurofibrillary Tangles | 2 | Onset Age                                             | 46 | -0.09 |
| Anterior Horn Cells Neurofibrillary Tangles | 2 | Thalamus Neurofibrillary Tangles                      | 7  | -0.08 |
| Anterior Horn Cells Neurofibrillary Tangles | 2 | Entorhinal Cortex Neurofibrillary Tangles             | 28 | -0.08 |
| Anterior Horn Cells Neurofibrillary Tangles | 2 | Loss of Neurons Substantia Nigra                      | 6  | -0.08 |
| Anterior Horn Cells Neurofibrillary Tangles | 2 | Loss of Neurons Locus Ceruleus                        | 6  | -0.07 |
| Anterior Horn Cells Neurofibrillary Tangles | 2 | Temporal Cortex Neurofibrillary Tangles               | 7  | -0.07 |
| Anterior Horn Cells Neurofibrillary Tangles | 2 | Substantia Nigra Neurofibrillary Tangles              | 6  | -0.07 |
| Anterior Horn Cells Neurofibrillary Tangles | 2 | Lewy Body Formation                                   | 5  | -0.07 |
| Anterior Horn Cells Neurofibrillary Tangles | 2 | Frontal Cortex Neurofibrillary Tangles                | 6  | -0.07 |
| Anterior Horn Cells Neurofibrillary Tangles | 2 | AD in Final Diagnosis                                 | 10 | 0.06  |
| Anterior Horn Cells Neurofibrillary Tangles | 2 | FTD in Final Diagnosis                                | 3  | -0.05 |
| Anterior Horn Cells Neurofibrillary Tangles | 2 | Microinfarcts                                         | 3  | -0.05 |
| Anterior Horn Cells Neurofibrillary Tangles | 2 | Lewy Body Disease in Final Diagnosis                  | 2  | -0.04 |
| Anterior Horn Cells Neurofibrillary Tangles | 2 | Neocortex Neurofibrillary Tangles                     | 2  | -0.04 |
| Anterior Horn Cells Neurofibrillary Tangles | 2 | Loss of Neurons Amygdala                              | 2  | -0.04 |
| Anterior Horn Cells Neurofibrillary Tangles | 2 | Cingulate Cortex Neurofibrillary Tangles              | 2  | -0.04 |
| Anterior Horn Cells Neurofibrillary Tangles | 2 | Familial ALS                                          | 1  | -0.03 |
| Anterior Horn Cells Neurofibrillary Tangles | 2 | Infarcts                                              | 1  | -0.03 |
| Anterior Horn Cells Neurofibrillary Tangles | 2 | Basal Ganglia Neurofibrillary Tangles                 | 1  | -0.03 |
| Anterior Horn Cells Neurofibrillary Tangles | 2 | Caudate Nucleus Neurofibrillary Tangles               | 1  | -0.03 |
| Anterior Horn Cells Neurofibrillary Tangles | 2 | Dentate Nucleus of Cerebellum Neurofibrillary Tangles | 1  | -0.03 |
| Anterior Horn Cells Neurofibrillary Tangles | 2 | Loss of Neurons Gyrus                                 | 1  | -0.03 |
| Anterior Horn Cells Neurofibrillary Tangles | 2 | Occipital Cortex Neurofibrillary Tangles              | 1  | -0.03 |

|                                             |    |                                           |    |       |
|---------------------------------------------|----|-------------------------------------------|----|-------|
| Anterior Horn Cells Neurofibrillary Tangles | 2  | Parietal Cortex Neurofibrillary Tangles   | 1  | -0.03 |
| Anterior Horn Cells Neurofibrillary Tangles | 2  | Putamen Neurofibrillary Tangles           | 1  | -0.03 |
| Anterior Horn Cells Neurofibrillary Tangles | 2  | Loss Purkinje Cells                       | 39 | -0.02 |
| Anterior Horn Cells Neurofibrillary Tangles | 2  | Hippocampus Neurofibrillary Tangles       | 17 | -0.02 |
| Anterior Horn Cells Neurofibrillary Tangles | 2  | Ventral Nerve Roots Atrophy               | 30 | 0.01  |
| Anterior Horn Cells Neurofibrillary Tangles | 2  | Amygdala Neurofibrillary Tangles          | 20 | -0.01 |
| Atherosclerosis                             | 16 | Ventral Nerve Roots Atrophy               | 30 | 0.50  |
| Atherosclerosis                             | 16 | Entorhinal Cortex Neurofibrillary Tangles | 28 | 0.36  |
| Atherosclerosis                             | 16 | Onset Age                                 | 46 | 0.34  |
| Atherosclerosis                             | 16 | Loss of Neurons Anterior Horns            | 20 | 0.34  |
| Atherosclerosis                             | 16 | Denervation                               | 31 | 0.33  |
| Atherosclerosis                             | 16 | Age of Death                              | 46 | 0.32  |
| Atherosclerosis                             | 16 | Diagnosis Age                             | 46 | 0.31  |
| Atherosclerosis                             | 16 | Hippocampus Neurofibrillary Tangles       | 17 | 0.31  |
| Atherosclerosis                             | 16 | Disease Duration                          | 46 | -0.28 |
| Atherosclerosis                             | 16 | Diagnostic Delay                          | 46 | -0.28 |
| Atherosclerosis                             | 16 | Betz Cell Loss                            | 35 | 0.27  |
| Atherosclerosis                             | 16 | Loss Purkinje Cells                       | 39 | 0.27  |
| Atherosclerosis                             | 16 | Cingulate Cortex Neurofibrillary Tangles  | 2  | 0.26  |
| Atherosclerosis                             | 16 | Insular Cortex Neurofibrillary Tangles    | 10 | 0.26  |
| Atherosclerosis                             | 16 | Brain Mass                                | 46 | -0.26 |
| Atherosclerosis                             | 16 | AD in Final Diagnosis                     | 10 | 0.24  |
| Atherosclerosis                             | 16 | Caudate Nucleus Neurofibrillary Tangles   | 1  | 0.21  |
| Atherosclerosis                             | 16 | Familial ALS                              | 1  | 0.21  |
| Atherosclerosis                             | 16 | Occipital Cortex Neurofibrillary Tangles  | 1  | 0.21  |
| Atherosclerosis                             | 16 | Putamen Neurofibrillary Tangles           | 1  | 0.21  |
| Atherosclerosis                             | 16 | Parietal Cortex Neurofibrillary Tangles   | 1  | 0.21  |
| Atherosclerosis                             | 16 | Temporal Cortex Neurofibrillary Tangles   | 7  | 0.21  |
| Atherosclerosis                             | 16 | FTLD in Final Diagnosis                   | 12 | 0.21  |
| Atherosclerosis                             | 16 | TDP-43                                    | 37 | 0.20  |
| Atherosclerosis                             | 16 | FTD in Final Diagnosis                    | 3  | -0.19 |
| Atherosclerosis                             | 16 | Amygdala Neurofibrillary Tangles          | 20 | 0.18  |
| Atherosclerosis                             | 16 | Locus Ceruleus Neurofibrillary Tangles    | 14 | 0.15  |
| Atherosclerosis                             | 16 | Lewy Body Disease in Final                | 2  | -0.15 |

|                                       |    | Diagnosis                                             |    |       |
|---------------------------------------|----|-------------------------------------------------------|----|-------|
| Atherosclerosis                       | 16 | Anterior Horn Cells Neurofibrillary Tangles           | 2  | 0.14  |
| Atherosclerosis                       | 16 | Loss of Neurons Locus Ceruleus                        | 6  | -0.13 |
| Atherosclerosis                       | 16 | Basal Ganglia Neurofibrillary Tangles                 | 1  | -0.11 |
| Atherosclerosis                       | 16 | Dentate Nucleus of Cerebellum Neurofibrillary Tangles | 1  | -0.11 |
| Atherosclerosis                       | 16 | Infarcts                                              | 1  | -0.11 |
| Atherosclerosis                       | 16 | Loss of Neurons Gyrus                                 | 1  | -0.11 |
| Atherosclerosis                       | 16 | Frontal Cortex Neurofibrillary Tangles                | 6  | -0.10 |
| Atherosclerosis                       | 16 | Paraspinal Muscle Fiber Atrophy                       | 26 | -0.10 |
| Atherosclerosis                       | 16 | Loss of Neurons Spinal Cord                           | 11 | -0.09 |
| Atherosclerosis                       | 16 | Substantia Nigra Pigmentary Incontinence              | 32 | -0.08 |
| Atherosclerosis                       | 16 | Lewy Body Formation                                   | 5  | -0.06 |
| Atherosclerosis                       | 16 | Diaphragm Atrophy                                     | 25 | 0.05  |
| Atherosclerosis                       | 16 | Substantia Nigra Neurofibrillary Tangles              | 6  | -0.05 |
| Atherosclerosis                       | 16 | Neocortex Neurofibrillary Tangles                     | 2  | 0.05  |
| Atherosclerosis                       | 16 | Nucleus Basalis Neurofibrillary Tangles               | 20 | 0.05  |
| Atherosclerosis                       | 16 | Locus Ceruleus Pigmentary Incontinence                | 35 | 0.05  |
| Atherosclerosis                       | 16 | Brain Atrophy                                         | 9  | 0.04  |
| Atherosclerosis                       | 16 | Tau Pathology/Tauopathy                               | 8  | 0.04  |
| Atherosclerosis                       | 16 | Hypothalamus Neurofibrillary Tangles                  | 10 | 0.03  |
| Atherosclerosis                       | 16 | Thalamus Neurofibrillary Tangles                      | 7  | 0.03  |
| Atherosclerosis                       | 16 | Anterior Corticospinal Tract Degeneration             | 33 | -0.03 |
| Atherosclerosis                       | 16 | Loss of Neurons Amygdala                              | 2  | 0.03  |
| Atherosclerosis                       | 16 | Lateral Corticospinal Tract Degeneration              | 41 | -0.03 |
| Atherosclerosis                       | 16 | Gender (1 = m, 2 = f)                                 | 46 | -0.02 |
| Atherosclerosis                       | 16 | Loss of Neurons Medulla                               | 15 | -0.02 |
| Atherosclerosis                       | 16 | Loss of Neurons Dentate Nucleus                       | 8  | -0.02 |
| Atherosclerosis                       | 16 | Loss of Neurons Substantia Nigra                      | 6  | 0.00  |
| Atherosclerosis                       | 16 | Microinfarcts                                         | 3  | 0.00  |
| Basal Ganglia Neurofibrillary Tangles | 1  | Substantia Nigra Neurofibrillary Tangles              | 6  | 0.61  |
| Basal Ganglia Neurofibrillary Tangles | 1  | FTD in Final Diagnosis                                | 3  | 0.56  |
| Basal Ganglia Neurofibrillary Tangles | 1  | Locus Ceruleus Neurofibrillary Tangles                | 14 | 0.39  |
| Basal Ganglia Neurofibrillary Tangles | 1  | Tau Pathology/Tauopathy                               | 8  | 0.32  |



|                                       |   |                                           |    |       |
|---------------------------------------|---|-------------------------------------------|----|-------|
| Basal Ganglia Neurofibrillary Tangles | 1 | Diaphragm Atrophy                         | 25 | 0.32  |
| Basal Ganglia Neurofibrillary Tangles | 1 | Paraspinal Muscle Fiber Atrophy           | 26 | 0.29  |
| Basal Ganglia Neurofibrillary Tangles | 1 | Nucleus Basalis Neurofibrillary Tangles   | 20 | 0.27  |
| Basal Ganglia Neurofibrillary Tangles | 1 | Amygdala Neurofibrillary Tangles          | 20 | 0.26  |
| Basal Ganglia Neurofibrillary Tangles | 1 | Lateral Corticospinal Tract Degeneration  | 41 | -0.26 |
| Basal Ganglia Neurofibrillary Tangles | 1 | Thalamus Neurofibrillary Tangles          | 7  | 0.25  |
| Basal Ganglia Neurofibrillary Tangles | 1 | Brain Mass                                | 46 | 0.22  |
| Basal Ganglia Neurofibrillary Tangles | 1 | Denervation                               | 31 | 0.21  |
| Basal Ganglia Neurofibrillary Tangles | 1 | Hypothalamus Neurofibrillary Tangles      | 10 | 0.20  |
| Basal Ganglia Neurofibrillary Tangles | 1 | Anterior Corticospinal Tract Degeneration | 33 | -0.20 |
| Basal Ganglia Neurofibrillary Tangles | 1 | Ventral Nerve Roots Atrophy               | 30 | -0.19 |
| Basal Ganglia Neurofibrillary Tangles | 1 | Entorhinal Cortex Neurofibrillary Tangles | 28 | 0.18  |
| Basal Ganglia Neurofibrillary Tangles | 1 | Betz Cell Loss                            | 35 | 0.15  |
| Basal Ganglia Neurofibrillary Tangles | 1 | Age of Death                              | 46 | -0.13 |
| Basal Ganglia Neurofibrillary Tangles | 1 | Loss of Neurons Anterior Horns            | 20 | 0.11  |
| Basal Ganglia Neurofibrillary Tangles | 1 | Gender (1 = m, 2 = f)                     | 46 | -0.11 |
| Basal Ganglia Neurofibrillary Tangles | 1 | Diagnosis Age                             | 46 | -0.11 |
| Basal Ganglia Neurofibrillary Tangles | 1 | Onset Age                                 | 46 | -0.10 |
| Basal Ganglia Neurofibrillary Tangles | 1 | Hippocampus Neurofibrillary Tangles       | 17 | 0.10  |
| Basal Ganglia Neurofibrillary Tangles | 1 | Loss of Neurons Medulla                   | 15 | -0.10 |
| Basal Ganglia Neurofibrillary Tangles | 1 | FTLD in Final Diagnosis                   | 12 | -0.09 |
| Basal Ganglia Neurofibrillary Tangles | 1 | AD in Final Diagnosis                     | 10 | -0.08 |
| Basal Ganglia Neurofibrillary Tangles | 1 | Loss Purkinje Cells                       | 39 | -0.08 |
| Basal Ganglia Neurofibrillary Tangles | 1 | Loss of Neurons Spinal Cord               | 11 | -0.08 |

|                                       |    |                                                       |    |       |
|---------------------------------------|----|-------------------------------------------------------|----|-------|
| Basal Ganglia Neurofibrillary Tangles | 1  | Insular Cortex Neurofibrillary Tangles                | 10 | -0.07 |
| Basal Ganglia Neurofibrillary Tangles | 1  | Loss of Neurons Dentate Nucleus                       | 8  | -0.07 |
| Basal Ganglia Neurofibrillary Tangles | 1  | Disease Duration                                      | 46 | -0.06 |
| Basal Ganglia Neurofibrillary Tangles | 1  | Loss of Neurons Substantia Nigra                      | 6  | -0.06 |
| Basal Ganglia Neurofibrillary Tangles | 1  | Loss of Neurons Locus Ceruleus                        | 6  | -0.05 |
| Basal Ganglia Neurofibrillary Tangles | 1  | Temporal Cortex Neurofibrillary Tangles               | 7  | -0.05 |
| Basal Ganglia Neurofibrillary Tangles | 1  | Lewy Body Formation                                   | 5  | -0.05 |
| Basal Ganglia Neurofibrillary Tangles | 1  | Frontal Cortex Neurofibrillary Tangles                | 6  | -0.05 |
| Basal Ganglia Neurofibrillary Tangles | 1  | Microinfarcts                                         | 3  | -0.04 |
| Basal Ganglia Neurofibrillary Tangles | 1  | Lewy Body Disease in Final Diagnosis                  | 2  | -0.03 |
| Basal Ganglia Neurofibrillary Tangles | 1  | Loss of Neurons Amygdala                              | 2  | -0.03 |
| Basal Ganglia Neurofibrillary Tangles | 1  | Cingulate Cortex Neurofibrillary Tangles              | 2  | -0.03 |
| Basal Ganglia Neurofibrillary Tangles | 1  | Locus Ceruleus Pigmentary Incontinence                | 35 | 0.02  |
| Basal Ganglia Neurofibrillary Tangles | 1  | Infarcts                                              | 1  | -0.02 |
| Basal Ganglia Neurofibrillary Tangles | 1  | Dentate Nucleus of Cerebellum Neurofibrillary Tangles | 1  | -0.02 |
| Basal Ganglia Neurofibrillary Tangles | 1  | Familial ALS                                          | 1  | -0.02 |
| Basal Ganglia Neurofibrillary Tangles | 1  | Loss of Neurons Gyrus                                 | 1  | -0.02 |
| Basal Ganglia Neurofibrillary Tangles | 1  | Occipital Cortex Neurofibrillary Tangles              | 1  | -0.02 |
| Basal Ganglia Neurofibrillary Tangles | 1  | Parietal Cortex Neurofibrillary Tangles               | 1  | -0.02 |
| Basal Ganglia Neurofibrillary Tangles | 1  | Substantia Nigra Pigmentary Incontinence              | 32 | 0.00  |
| Basal Ganglia Neurofibrillary Tangles | 1  | Diagnostic Delay                                      | 46 | 0.00  |
| Beta_Amyloid                          | 16 | AD in Final Diagnosis                                 | 10 | 0.50  |
| Beta_Amyloid                          | 16 | Loss of Neurons Medulla                               | 15 | 0.50  |
| Beta_Amyloid                          | 16 | Hippocampus Neurofibrillary Tangles                   | 17 | 0.41  |
| Beta_Amyloid                          | 16 | Brain Neuron Loss                                     | 38 | 0.33  |
| Beta_Amyloid                          | 16 | Age of Death                                          | 46 | 0.32  |

|              |    |                                                       |    |       |
|--------------|----|-------------------------------------------------------|----|-------|
| Beta_Amyloid | 16 | FTLD in Final Diagnosis                               | 12 | 0.29  |
| Beta_Amyloid | 16 | Diagnosis Age                                         | 46 | 0.29  |
| Beta_Amyloid | 16 | Onset Age                                             | 46 | 0.28  |
| Beta_Amyloid | 16 | Upper limb                                            | 17 | 0.28  |
| Beta_Amyloid | 16 | Bulbar                                                | 12 | 0.26  |
| Beta_Amyloid | 16 | Rilutek                                               | 29 | 0.25  |
| Beta_Amyloid | 16 | Substantia Nigra Pigmentary Incontinence              | 32 | 0.25  |
| Beta_Amyloid | 16 | Locus Ceruleus Pigmentary Incontinence                | 35 | 0.24  |
| Beta_Amyloid | 16 | Temporal Cortex Neurofibrillary Tangles               | 7  | 0.24  |
| Beta_Amyloid | 16 | Amygdala Neurofibrillary Tangles                      | 20 | 0.24  |
| Beta_Amyloid | 16 | Loss Purkinje Cells                                   | 39 | 0.22  |
| Beta_Amyloid | 16 | Tau Pathology/Tauopathy                               | 8  | -0.21 |
| Beta_Amyloid | 16 | Loss of Neurons Spinal Cord                           | 11 | 0.21  |
| Beta_Amyloid | 16 | Infarcts                                              | 1  | 0.20  |
| Beta_Amyloid | 16 | Dentate Nucleus of Cerebellum Neurofibrillary Tangles | 1  | 0.20  |
| Beta_Amyloid | 16 | Parietal Cortex Neurofibrillary Tangles               | 1  | 0.20  |
| Beta_Amyloid | 16 | Insular Cortex Neurofibrillary Tangles                | 10 | 0.20  |
| Beta_Amyloid | 16 | Denervation                                           | 31 | -0.19 |
| Beta_Amyloid | 16 | FTD in Final Diagnosis                                | 3  | -0.19 |
| Beta_Amyloid | 16 | H_and_E                                               | 43 | 0.19  |
| Beta_Amyloid | 16 | NFT (any location)                                    | 36 | 0.19  |
| Beta_Amyloid | 16 | Entorhinal Cortex Neurofibrillary Tangles             | 28 | 0.18  |
| Beta_Amyloid | 16 | Ventral Nerve Roots Atrophy                           | 30 | 0.17  |
| Beta_Amyloid | 16 | Loss of Neurons Anterior Horns                        | 20 | 0.17  |
| Beta_Amyloid | 16 | Lewy Body Disease in Final Diagnosis                  | 2  | -0.16 |
| Beta_Amyloid | 16 | Neocortex Neurofibrillary Tangles                     | 2  | -0.15 |
| Beta_Amyloid | 16 | Anterior Corticospinal Tract Degeneration             | 33 | 0.15  |
| Beta_Amyloid | 16 | Loss of Neurons Amygdala                              | 2  | -0.15 |
| Beta_Amyloid | 16 | Thalamus Neurofibrillary Tangles                      | 7  | -0.15 |
| Beta_Amyloid | 16 | Nucleus Basalis Neurofibrillary Tangles               | 20 | 0.15  |
| Beta_Amyloid | 16 | Cingulate Cortex Neurofibrillary Tangles              | 2  | -0.14 |
| Beta_Amyloid | 16 | Brain Atrophy                                         | 9  | 0.12  |
| Beta_Amyloid | 16 | Betz Cell Loss                                        | 35 | 0.11  |
| Beta_Amyloid | 16 | Caudate Nucleus Neurofibrillary Tangles               | 1  | -0.11 |
| Beta_Amyloid | 16 | Familial ALS                                          | 1  | -0.11 |
| Beta_Amyloid | 16 | Loss of Neurons Gyrus                                 | 1  | -0.11 |
| Beta_Amyloid | 16 | Putamen Neurofibrillary Tangles                       | 1  | -0.11 |

|                |    |                                             |    |       |
|----------------|----|---------------------------------------------|----|-------|
| Beta_Amyloid   | 16 | Basal Ganglia Neurofibrillary Tangles       | 1  | -0.11 |
| Beta_Amyloid   | 16 | Occipital Cortex Neurofibrillary Tangles    | 1  | -0.11 |
| Beta_Amyloid   | 16 | Loss of Neurons Dentate Nucleus             | 8  | 0.10  |
| Beta_Amyloid   | 16 | Loss of Neurons Locus Ceruleus              | 6  | -0.09 |
| Beta_Amyloid   | 16 | Gender (1 = m, 2 = f)                       | 46 | -0.09 |
| Beta_Amyloid   | 16 | Substantia Nigra Neurofibrillary Tangles    | 6  | 0.09  |
| Beta_Amyloid   | 16 | Hypothalamus Neurofibrillary Tangles        | 10 | 0.08  |
| Beta_Amyloid   | 16 | TDP-43                                      | 37 | 0.08  |
| Beta_Amyloid   | 16 | Ventricular Dilation                        | 6  | -0.07 |
| Beta_Amyloid   | 16 | Lewy Body Formation                         | 5  | -0.07 |
| Beta_Amyloid   | 16 | Brain Mass                                  | 46 | -0.07 |
| Beta_Amyloid   | 16 | Diagnostic Delay                            | 46 | 0.06  |
| Beta_Amyloid   | 16 | Disease Duration                            | 46 | 0.06  |
| Beta_Amyloid   | 16 | Frontal Cortex Neurofibrillary Tangles      | 6  | 0.05  |
| Beta_Amyloid   | 16 | Limb                                        | 30 | 0.05  |
| Beta_Amyloid   | 16 | Locus Ceruleus Neurofibrillary Tangles      | 14 | -0.04 |
| Beta_Amyloid   | 16 | Diaphragm Atrophy                           | 25 | 0.03  |
| Beta_Amyloid   | 16 | Ventral Root Atrophy                        | 30 | -0.03 |
| Beta_Amyloid   | 16 | Lateral Corticospinal Tract Degeneration    | 41 | 0.02  |
| Beta_Amyloid   | 16 | Paraspinal Muscle Fiber Atrophy             | 26 | 0.01  |
| Beta_Amyloid   | 16 | Loss of Neurons Substantia Nigra            | 6  | -0.01 |
| Beta_Amyloid   | 16 | Lower Limb                                  | 13 | -0.01 |
| Beta_Amyloid   | 16 | Atherosclerosis                             | 16 | 0.01  |
| Beta_Amyloid   | 16 | General Spinal Cord Atrophy                 | 4  | -0.01 |
| Beta_Amyloid   | 16 | Myelin?                                     | 43 | 0.01  |
| Beta_Amyloid   | 16 | Microinfarcts                               | 3  | -0.01 |
| Beta_Amyloid   | 16 | Anterior Horn Cells Neurofibrillary Tangles | 2  | -0.01 |
| Betz Cell Loss | 35 | Ventral Nerve Roots Atrophy                 | 30 | 0.28  |
| Betz Cell Loss | 35 | Loss Purkinje Cells                         | 39 | 0.25  |
| Betz Cell Loss | 35 | Denervation                                 | 31 | 0.24  |
| Betz Cell Loss | 35 | Loss of Neurons Gyrus                       | 1  | 0.23  |
| Betz Cell Loss | 35 | AD in Final Diagnosis                       | 10 | 0.22  |
| Betz Cell Loss | 35 | Diaphragm Atrophy                           | 25 | 0.19  |
| Betz Cell Loss | 35 | Tau Pathology/Tauopathy                     | 8  | 0.19  |
| Betz Cell Loss | 35 | Loss of Neurons Amygdala                    | 2  | -0.18 |
| Betz Cell Loss | 35 | Loss of Neurons Substantia Nigra            | 6  | 0.18  |
| Betz Cell Loss | 35 | Gender (1 = m, 2 = f)                       | 46 | -0.18 |
| Betz Cell Loss | 35 | Loss of Neurons Medulla                     | 15 | 0.17  |
| Betz Cell Loss | 35 | Familial ALS                                | 1  | -0.16 |
| Betz Cell Loss | 35 | Paraspinal Muscle Fiber Atrophy             | 26 | 0.11  |
| Betz Cell Loss | 35 | Microinfarcts                               | 3  | -0.10 |

|                |    |                                                       |    |       |
|----------------|----|-------------------------------------------------------|----|-------|
| Betz Cell Loss | 35 | Infarcts                                              | 1  | -0.08 |
| Betz Cell Loss | 35 | Disease Duration                                      | 46 | 0.08  |
| Betz Cell Loss | 35 | Diagnostic Delay                                      | 46 | -0.08 |
| Betz Cell Loss | 35 | Lewy Body Formation                                   | 5  | 0.07  |
| Betz Cell Loss | 35 | FTD in Final Diagnosis                                | 3  | -0.06 |
| Betz Cell Loss | 35 | Brain Mass                                            | 46 | 0.05  |
| Betz Cell Loss | 35 | Loss of Neurons Spinal Cord                           | 11 | -0.05 |
| Betz Cell Loss | 35 | Diagnosis Age                                         | 46 | -0.04 |
| Betz Cell Loss | 35 | Onset Age                                             | 46 | -0.03 |
| Betz Cell Loss | 35 | Loss of Neurons Anterior Horns                        | 20 | -0.03 |
| Betz Cell Loss | 35 | Age of Death                                          | 46 | -0.02 |
| Betz Cell Loss | 35 | Loss of Neurons Locus Ceruleus                        | 6  | -0.02 |
| Betz Cell Loss | 35 | Lewy Body Disease in Final Diagnosis                  | 2  | -0.01 |
| Betz Cell Loss | 35 | Loss of Neurons Dentate Nucleus                       | 8  | -0.01 |
| Betz Cell Loss | 35 | FTLD in Final Diagnosis                               | 12 | 0.00  |
| Brain Atrophy  | 9  | Loss of Neurons Amygdala                              | 2  | 0.47  |
| Brain Atrophy  | 9  | FTLD in Final Diagnosis                               | 12 | 0.41  |
| Brain Atrophy  | 9  | Caudate Nucleus Neurofibrillary Tangles               | 1  | 0.37  |
| Brain Atrophy  | 9  | Dentate Nucleus of Cerebellum Neurofibrillary Tangles | 1  | 0.37  |
| Brain Atrophy  | 9  | Putamen Neurofibrillary Tangles                       | 1  | 0.37  |
| Brain Atrophy  | 9  | Amygdala Neurofibrillary Tangles                      | 20 | 0.34  |
| Brain Atrophy  | 9  | Locus Ceruleus Pigmentary Incontinence                | 35 | 0.31  |
| Brain Atrophy  | 9  | TDP-43                                                | 37 | 0.29  |
| Brain Atrophy  | 9  | Hypothalamus Neurofibrillary Tangles                  | 10 | 0.29  |
| Brain Atrophy  | 9  | Ventral Nerve Roots Atrophy                           | 30 | 0.28  |
| Brain Atrophy  | 9  | Substantia Nigra Pigmentary Incontinence              | 32 | 0.26  |
| Brain Atrophy  | 9  | Loss Purkinje Cells                                   | 39 | 0.25  |
| Brain Atrophy  | 9  | Loss of Neurons Spinal Cord                           | 11 | 0.25  |
| Brain Atrophy  | 9  | Age of Death                                          | 46 | 0.25  |
| Brain Atrophy  | 9  | Hippocampus Neurofibrillary Tangles                   | 17 | 0.23  |
| Brain Atrophy  | 9  | Frontal Cortex Neurofibrillary Tangles                | 6  | 0.22  |
| Brain Atrophy  | 9  | Nucleus Basalis Neurofibrillary Tangles               | 20 | 0.22  |
| Brain Atrophy  | 9  | Diagnosis Age                                         | 46 | 0.22  |
| Brain Atrophy  | 9  | Onset Age                                             | 46 | 0.21  |
| Brain Atrophy  | 9  | Entorhinal Cortex Neurofibrillary Tangles             | 28 | 0.20  |
| Brain Atrophy  | 9  | Betz Cell Loss                                        | 35 | -0.18 |
| Brain Atrophy  | 9  | Loss of Neurons Medulla                               | 15 | 0.18  |
| Brain Atrophy  | 9  | Loss of Neurons Locus Ceruleus                        | 6  | -0.16 |
| Brain Atrophy  | 9  | Temporal Cortex Neurofibrillary                       | 7  | 0.16  |

|               |    |                                             |    |       |
|---------------|----|---------------------------------------------|----|-------|
|               |    | Tangles                                     |    |       |
| Brain Atrophy | 9  | Lateral Corticospinal Tract Degeneration    | 41 | -0.15 |
| Brain Atrophy | 9  | Microinfarcts                               | 3  | 0.14  |
| Brain Atrophy | 9  | Substantia Nigra Neurofibrillary Tangles    | 6  | 0.14  |
| Brain Atrophy | 9  | Thalamus Neurofibrillary Tangles            | 7  | 0.12  |
| Brain Atrophy | 9  | FTD in Final Diagnosis                      | 3  | -0.12 |
| Brain Atrophy | 9  | Loss of Neurons Dentate Nucleus             | 8  | 0.12  |
| Brain Atrophy | 9  | Loss of Neurons Anterior Horns              | 20 | 0.11  |
| Brain Atrophy | 9  | Anterior Corticospinal Tract Degeneration   | 33 | -0.10 |
| Brain Atrophy | 9  | Lewy Body Disease in Final Diagnosis        | 2  | -0.09 |
| Brain Atrophy | 9  | Neocortex Neurofibrillary Tangles           | 2  | -0.09 |
| Brain Atrophy | 9  | Anterior Horn Cells Neurofibrillary Tangles | 2  | -0.09 |
| Brain Atrophy | 9  | Insular Cortex Neurofibrillary Tangles      | 10 | 0.08  |
| Brain Atrophy | 9  | AD in Final Diagnosis                       | 10 | 0.07  |
| Brain Atrophy | 9  | Paraspinal Muscle Fiber Atrophy             | 26 | -0.07 |
| Brain Atrophy | 9  | Denervation                                 | 31 | -0.07 |
| Brain Atrophy | 9  | Lewy Body Formation                         | 5  | -0.07 |
| Brain Atrophy | 9  | Basal Ganglia Neurofibrillary Tangles       | 1  | -0.07 |
| Brain Atrophy | 9  | Loss of Neurons Gyrus                       | 1  | -0.07 |
| Brain Atrophy | 9  | Familial ALS                                | 1  | -0.07 |
| Brain Atrophy | 9  | Infarcts                                    | 1  | -0.07 |
| Brain Atrophy | 9  | Occipital Cortex Neurofibrillary Tangles    | 1  | -0.07 |
| Brain Atrophy | 9  | Parietal Cortex Neurofibrillary Tangles     | 1  | -0.07 |
| Brain Atrophy | 9  | Cingulate Cortex Neurofibrillary Tangles    | 2  | 0.06  |
| Brain Atrophy | 9  | Gender (1 = m, 2 = f)                       | 46 | 0.05  |
| Brain Atrophy | 9  | Diaphragm Atrophy                           | 25 | -0.04 |
| Brain Atrophy | 9  | Disease Duration                            | 46 | 0.04  |
| Brain Atrophy | 9  | Diagnostic Delay                            | 46 | 0.03  |
| Brain Atrophy | 9  | Brain Mass                                  | 46 | -0.03 |
| Brain Atrophy | 9  | Locus Ceruleus Neurofibrillary Tangles      | 14 | 0.02  |
| Brain Atrophy | 9  | Loss of Neurons Substantia Nigra            | 6  | -0.02 |
| Brain Atrophy | 9  | Tau Pathology/Tauopathy                     | 8  | 0.02  |
| Brain Mass    | 46 | Gender (1 = m, 2 = f)                       | 46 | -0.58 |
| Brain Mass    | 46 | Diagnostic Delay                            | 46 | 0.28  |
| Brain Mass    | 46 | Onset Age                                   | 46 | -0.11 |
| Brain Mass    | 46 | Age of Death                                | 46 | -0.11 |
| Brain Mass    | 46 | Diagnosis Age                               | 46 | -0.08 |
| Brain Mass    | 46 | Disease Duration                            | 46 | 0.06  |

|                   |    |                                                       |    |       |
|-------------------|----|-------------------------------------------------------|----|-------|
| Brain Neuron Loss | 38 | Loss of Neurons Dentate Nucleus                       | 8  | 0.58  |
| Brain Neuron Loss | 38 | Loss of Neurons Medulla                               | 15 | 0.52  |
| Brain Neuron Loss | 38 | Loss of Neurons Spinal Cord                           | 11 | 0.45  |
| Brain Neuron Loss | 38 | Loss of Neurons Locus Ceruleus                        | 6  | 0.42  |
| Brain Neuron Loss | 38 | Loss Purkinje Cells                                   | 39 | 0.40  |
| Brain Neuron Loss | 38 | Loss of Neurons Substantia Nigra                      | 6  | 0.38  |
| Brain Neuron Loss | 38 | Locus Ceruleus Pigmentary Incontinence                | 35 | 0.35  |
| Brain Neuron Loss | 38 | Substantia Nigra Pigmentary Incontinence              | 32 | 0.30  |
| Brain Neuron Loss | 38 | Brain Atrophy                                         | 9  | 0.29  |
| Brain Neuron Loss | 38 | Loss of Neurons Anterior Horns                        | 20 | 0.28  |
| Brain Neuron Loss | 38 | Temporal Cortex Neurofibrillary Tangles               | 7  | 0.28  |
| Brain Neuron Loss | 38 | Diaphragm Atrophy                                     | 25 | 0.28  |
| Brain Neuron Loss | 38 | Dentate Nucleus of Cerebellum Neurofibrillary Tangles | 1  | 0.28  |
| Brain Neuron Loss | 38 | Parietal Cortex Neurofibrillary Tangles               | 1  | 0.28  |
| Brain Neuron Loss | 38 | Disease Duration                                      | 46 | 0.25  |
| Brain Neuron Loss | 38 | Thalamus Neurofibrillary Tangles                      | 7  | -0.24 |
| Brain Neuron Loss | 38 | TDP-43                                                | 37 | 0.24  |
| Brain Neuron Loss | 38 | Cingulate Cortex Neurofibrillary Tangles              | 2  | 0.22  |
| Brain Neuron Loss | 38 | FTLD in Final Diagnosis                               | 12 | 0.21  |
| Brain Neuron Loss | 38 | Gender (1 = m, 2 = f)                                 | 46 | 0.20  |
| Brain Neuron Loss | 38 | Paraspinal Muscle Fiber Atrophy                       | 26 | 0.20  |
| Brain Neuron Loss | 38 | Ventral Nerve Roots Atrophy                           | 30 | 0.17  |
| Brain Neuron Loss | 38 | Substantia Nigra Neurofibrillary Tangles              | 6  | 0.16  |
| Brain Neuron Loss | 38 | Loss of Neurons Amygdala                              | 2  | 0.16  |
| Brain Neuron Loss | 38 | FTD in Final Diagnosis                                | 3  | -0.15 |
| Brain Neuron Loss | 38 | Loss of Neurons Gyrus                                 | 1  | 0.15  |
| Brain Neuron Loss | 38 | Lewy Body Formation                                   | 5  | -0.13 |
| Brain Neuron Loss | 38 | Ventricular Dilation                                  | 6  | -0.12 |
| Brain Neuron Loss | 38 | Caudate Nucleus Neurofibrillary Tangles               | 1  | -0.11 |
| Brain Neuron Loss | 38 | Putamen Neurofibrillary Tangles                       | 1  | -0.11 |
| Brain Neuron Loss | 38 | Frontal Cortex Neurofibrillary Tangles                | 6  | 0.11  |
| Brain Neuron Loss | 38 | Amygdala Neurofibrillary Tangles                      | 20 | 0.11  |
| Brain Neuron Loss | 38 | Hippocampus Neurofibrillary Tangles                   | 17 | 0.10  |
| Brain Neuron Loss | 38 | General Spinal Cord Atrophy                           | 4  | -0.10 |
| Brain Neuron Loss | 38 | Anterior Horn Cells Neurofibrillary Tangles           | 2  | -0.09 |
| Brain Neuron Loss | 38 | NFT (any location)                                    | 36 | 0.09  |
| Brain Neuron Loss | 38 | Entorhinal Cortex Neurofibrillary Tangles             | 28 | 0.09  |

|                   |    |                                           |    |       |
|-------------------|----|-------------------------------------------|----|-------|
| Brain Neuron Loss | 38 | Anterior Corticospinal Tract Degeneration | 33 | 0.08  |
| Brain Neuron Loss | 38 | Atherosclerosis                           | 16 | 0.08  |
| Brain Neuron Loss | 38 | Hypothalamus Neurofibrillary Tangles      | 10 | -0.07 |
| Brain Neuron Loss | 38 | Neocortex Neurofibrillary Tangles         | 2  | -0.07 |
| Brain Neuron Loss | 38 | Basal Ganglia Neurofibrillary Tangles     | 1  | -0.07 |
| Brain Neuron Loss | 38 | Lewy Body Disease in Final Diagnosis      | 2  | -0.07 |
| Brain Neuron Loss | 38 | Brain Mass                                | 46 | 0.07  |
| Brain Neuron Loss | 38 | Nucleus Basalis Neurofibrillary Tangles   | 20 | 0.06  |
| Brain Neuron Loss | 38 | AD in Final Diagnosis                     | 10 | 0.06  |
| Brain Neuron Loss | 38 | Betz Cell Loss                            | 35 | 0.05  |
| Brain Neuron Loss | 38 | Denervation                               | 31 | 0.05  |
| Brain Neuron Loss | 38 | Age of Death                              | 46 | 0.04  |
| Brain Neuron Loss | 38 | Tau Pathology/Tauopathy                   | 8  | -0.03 |
| Brain Neuron Loss | 38 | Familial ALS                              | 1  | -0.03 |
| Brain Neuron Loss | 38 | Infarcts                                  | 1  | -0.03 |
| Brain Neuron Loss | 38 | Occipital Cortex Neurofibrillary Tangles  | 1  | -0.03 |
| Brain Neuron Loss | 38 | Insular Cortex Neurofibrillary Tangles    | 10 | -0.02 |
| Brain Neuron Loss | 38 | Onset Age                                 | 46 | -0.02 |
| Brain Neuron Loss | 38 | Diagnosis Age                             | 46 | -0.02 |
| Brain Neuron Loss | 38 | Lateral Corticospinal Tract Degeneration  | 41 | 0.02  |
| Brain Neuron Loss | 38 | Ventral Root Atrophy                      | 30 | 0.01  |
| Brain Neuron Loss | 38 | Microinfarcts                             | 3  | 0.00  |
| Brain Neuron Loss | 38 | Diagnostic Delay                          | 46 | 0.00  |
| Brain Neuron Loss | 38 | Locus Ceruleus Neurofibrillary Tangles    | 14 | 0.00  |
| Bulbar            | 12 | Anterior Corticospinal Tract Degeneration | 33 | -0.33 |
| Bulbar            | 12 | Loss of Neurons Locus Ceruleus            | 6  | -0.31 |
| Bulbar            | 12 | Onset Age                                 | 46 | 0.28  |
| Bulbar            | 12 | Age of Death                              | 46 | 0.28  |
| Bulbar            | 12 | Diagnosis Age                             | 46 | 0.27  |
| Bulbar            | 12 | Brain Atrophy                             | 9  | 0.27  |
| Bulbar            | 12 | Lateral Corticospinal Tract Degeneration  | 41 | -0.26 |
| Bulbar            | 12 | Cingulate Cortex Neurofibrillary Tangles  | 2  | -0.26 |
| Bulbar            | 12 | FTD in Final Diagnosis                    | 3  | 0.25  |
| Bulbar            | 12 | Microinfarcts                             | 3  | 0.25  |
| Bulbar            | 12 | Basal Ganglia Neurofibrillary Tangles     | 1  | 0.24  |
| Bulbar            | 12 | Caudate Nucleus Neurofibrillary Tangles   | 1  | 0.24  |



|        |    |                                             |    |       |
|--------|----|---------------------------------------------|----|-------|
| Bulbar | 12 | Infarcts                                    | 1  | 0.24  |
| Bulbar | 12 | Putamen Neurofibrillary Tangles             | 1  | 0.24  |
| Bulbar | 12 | Loss of Neurons Dentate Nucleus             | 8  | -0.23 |
| Bulbar | 12 | Hippocampus Neurofibrillary Tangles         | 17 | 0.22  |
| Bulbar | 12 | Diaphragm Atrophy                           | 25 | 0.19  |
| Bulbar | 12 | Lewy Body Disease in Final Diagnosis        | 2  | -0.19 |
| Bulbar | 12 | Insular Cortex Neurofibrillary Tangles      | 10 | -0.18 |
| Bulbar | 12 | Loss Purkinje Cells                         | 39 | -0.18 |
| Bulbar | 12 | General Spinal Cord Atrophy                 | 4  | 0.17  |
| Bulbar | 12 | Ventricular Dilation                        | 6  | 0.17  |
| Bulbar | 12 | Loss of Neurons Amygdala                    | 2  | -0.16 |
| Bulbar | 12 | FTLD in Final Diagnosis                     | 12 | 0.16  |
| Bulbar | 12 | Loss of Neurons Anterior Horns              | 20 | 0.16  |
| Bulbar | 12 | Amygdala Neurofibrillary Tangles            | 20 | 0.15  |
| Bulbar | 12 | Neocortex Neurofibrillary Tangles           | 2  | 0.15  |
| Bulbar | 12 | Disease Duration                            | 46 | -0.15 |
| Bulbar | 12 | Ventral Nerve Roots Atrophy                 | 30 | 0.14  |
| Bulbar | 12 | TDP-43                                      | 37 | -0.14 |
| Bulbar | 12 | Substantia Nigra Pigmentary Incontinence    | 32 | 0.14  |
| Bulbar | 12 | Limb                                        | 30 | -0.13 |
| Bulbar | 12 | Lewy Body Formation                         | 5  | -0.13 |
| Bulbar | 12 | Ventral Root Atrophy                        | 30 | 0.12  |
| Bulbar | 12 | Gender (1 = m, 2 = f)                       | 46 | -0.12 |
| Bulbar | 12 | Nucleus Basalis Neurofibrillary Tangles     | 20 | 0.12  |
| Bulbar | 12 | Brain Mass                                  | 46 | -0.11 |
| Bulbar | 12 | Locus Ceruleus Neurofibrillary Tangles      | 14 | -0.11 |
| Bulbar | 12 | Diagnostic Delay                            | 46 | -0.11 |
| Bulbar | 12 | Temporal Cortex Neurofibrillary Tangles     | 7  | -0.11 |
| Bulbar | 12 | Entorhinal Cortex Neurofibrillary Tangles   | 28 | 0.09  |
| Bulbar | 12 | Thalamus Neurofibrillary Tangles            | 7  | 0.09  |
| Bulbar | 12 | Brain Neuron Loss                           | 38 | -0.09 |
| Bulbar | 12 | Denervation                                 | 31 | -0.08 |
| Bulbar | 12 | Substantia Nigra Neurofibrillary Tangles    | 6  | 0.08  |
| Bulbar | 12 | Anterior Horn Cells Neurofibrillary Tangles | 2  | -0.08 |
| Bulbar | 12 | Paraspinal Muscle Fiber Atrophy             | 26 | 0.08  |
| Bulbar | 12 | Loss of Neurons Medulla                     | 15 | 0.06  |
| Bulbar | 12 | Parietal Cortex Neurofibrillary Tangles     | 1  | -0.06 |
| Bulbar | 12 | Familial ALS                                | 1  | -0.06 |

|                                         |    |                                                       |    |       |
|-----------------------------------------|----|-------------------------------------------------------|----|-------|
| Bulbar                                  | 12 | Occipital Cortex Neurofibrillary Tangles              | 1  | -0.06 |
| Bulbar                                  | 12 | Loss of Neurons Gyrus                                 | 1  | -0.06 |
| Bulbar                                  | 12 | Dentate Nucleus of Cerebellum Neurofibrillary Tangles | 1  | -0.06 |
| Bulbar                                  | 12 | AD in Final Diagnosis                                 | 10 | 0.06  |
| Bulbar                                  | 12 | Frontal Cortex Neurofibrillary Tangles                | 6  | -0.05 |
| Bulbar                                  | 12 | NFT (any location)                                    | 36 | 0.05  |
| Bulbar                                  | 12 | Atherosclerosis                                       | 16 | -0.05 |
| Bulbar                                  | 12 | Loss of Neurons Substantia Nigra                      | 6  | -0.05 |
| Bulbar                                  | 12 | Betz Cell Loss                                        | 35 | -0.04 |
| Bulbar                                  | 12 | Loss of Neurons Spinal Cord                           | 11 | 0.01  |
| Bulbar                                  | 12 | Hypothalamus Neurofibrillary Tangles                  | 10 | -0.01 |
| Bulbar                                  | 12 | Tau Pathology/Tauopathy                               | 8  | -0.01 |
| Bulbar                                  | 12 | Locus Ceruleus Pigmentary Incontinence                | 35 | 0.00  |
| Caudate Nucleus Neurofibrillary Tangles | 1  | Thalamus Neurofibrillary Tangles                      | 7  | 0.49  |
| Caudate Nucleus Neurofibrillary Tangles | 1  | Hypothalamus Neurofibrillary Tangles                  | 10 | 0.41  |
| Caudate Nucleus Neurofibrillary Tangles | 1  | Hippocampus Neurofibrillary Tangles                   | 17 | 0.37  |
| Caudate Nucleus Neurofibrillary Tangles | 1  | Amygdala Neurofibrillary Tangles                      | 20 | 0.32  |
| Caudate Nucleus Neurofibrillary Tangles | 1  | AD in Final Diagnosis                                 | 10 | 0.28  |
| Caudate Nucleus Neurofibrillary Tangles | 1  | Nucleus Basalis Neurofibrillary Tangles               | 20 | 0.27  |
| Caudate Nucleus Neurofibrillary Tangles | 1  | FTLD in Final Diagnosis                               | 12 | 0.25  |
| Caudate Nucleus Neurofibrillary Tangles | 1  | Entorhinal Cortex Neurofibrillary Tangles             | 28 | 0.23  |
| Caudate Nucleus Neurofibrillary Tangles | 1  | Substantia Nigra Neurofibrillary Tangles              | 6  | 0.23  |
| Caudate Nucleus Neurofibrillary Tangles | 1  | Onset Age                                             | 46 | 0.23  |
| Caudate Nucleus Neurofibrillary Tangles | 1  | Diagnosis Age                                         | 46 | 0.22  |
| Caudate Nucleus Neurofibrillary Tangles | 1  | Age of Death                                          | 46 | 0.21  |
| Caudate Nucleus Neurofibrillary Tangles | 1  | Ventral Nerve Roots Atrophy                           | 30 | 0.21  |
| Caudate Nucleus Neurofibrillary Tangles | 1  | Anterior Corticospinal Tract Degeneration             | 33 | -0.20 |
| Caudate Nucleus Neurofibrillary Tangles | 1  | Disease Duration                                      | 46 | -0.18 |

|                                         |   |                                          |    |       |
|-----------------------------------------|---|------------------------------------------|----|-------|
| Caudate Nucleus Neurofibrillary Tangles | 1 | Lateral Corticospinal Tract Degeneration | 41 | -0.18 |
| Caudate Nucleus Neurofibrillary Tangles | 1 | Betz Cell Loss                           | 35 | -0.16 |
| Caudate Nucleus Neurofibrillary Tangles | 1 | Diaphragm Atrophy                        | 25 | -0.15 |
| Caudate Nucleus Neurofibrillary Tangles | 1 | Paraspinal Muscle Fiber Atrophy          | 26 | -0.15 |
| Caudate Nucleus Neurofibrillary Tangles | 1 | Substantia Nigra Pigmentary Incontinence | 32 | -0.15 |
| Caudate Nucleus Neurofibrillary Tangles | 1 | Loss of Neurons Anterior Horns           | 20 | -0.12 |
| Caudate Nucleus Neurofibrillary Tangles | 1 | Diagnostic Delay                         | 46 | -0.11 |
| Caudate Nucleus Neurofibrillary Tangles | 1 | Gender (1 = m, 2 = f)                    | 46 | -0.11 |
| Caudate Nucleus Neurofibrillary Tangles | 1 | Loss of Neurons Medulla                  | 15 | -0.10 |
| Caudate Nucleus Neurofibrillary Tangles | 1 | Loss of Neurons Spinal Cord              | 11 | 0.10  |
| Caudate Nucleus Neurofibrillary Tangles | 1 | Locus Ceruleus Neurofibrillary Tangles   | 14 | 0.09  |
| Caudate Nucleus Neurofibrillary Tangles | 1 | Loss Purkinje Cells                      | 39 | -0.08 |
| Caudate Nucleus Neurofibrillary Tangles | 1 | Insular Cortex Neurofibrillary Tangles   | 10 | -0.07 |
| Caudate Nucleus Neurofibrillary Tangles | 1 | Tau Pathology/Tauopathy                  | 8  | -0.07 |
| Caudate Nucleus Neurofibrillary Tangles | 1 | Loss of Neurons Dentate Nucleus          | 8  | -0.07 |
| Caudate Nucleus Neurofibrillary Tangles | 1 | Denervation                              | 31 | -0.06 |
| Caudate Nucleus Neurofibrillary Tangles | 1 | Loss of Neurons Substantia Nigra         | 6  | -0.06 |
| Caudate Nucleus Neurofibrillary Tangles | 1 | Loss of Neurons Locus Ceruleus           | 6  | -0.05 |
| Caudate Nucleus Neurofibrillary Tangles | 1 | Temporal Cortex Neurofibrillary Tangles  | 7  | -0.05 |
| Caudate Nucleus Neurofibrillary Tangles | 1 | Lewy Body Formation                      | 5  | -0.05 |
| Caudate Nucleus Neurofibrillary Tangles | 1 | Frontal Cortex Neurofibrillary Tangles   | 6  | -0.05 |
| Caudate Nucleus Neurofibrillary Tangles | 1 | FTD in Final Diagnosis                   | 3  | -0.04 |
| Caudate Nucleus Neurofibrillary Tangles | 1 | Microinfarcts                            | 3  | -0.04 |
| Caudate Nucleus Neurofibrillary Tangles | 1 | Lewy Body Disease in Final Diagnosis     | 2  | -0.03 |

|                                          |   |                                                       |    |       |
|------------------------------------------|---|-------------------------------------------------------|----|-------|
| Caudate Nucleus Neurofibrillary Tangles  | 1 | Neocortex Neurofibrillary Tangles                     | 2  | -0.03 |
| Caudate Nucleus Neurofibrillary Tangles  | 1 | Loss of Neurons Amygdala                              | 2  | -0.03 |
| Caudate Nucleus Neurofibrillary Tangles  | 1 | Cingulate Cortex Neurofibrillary Tangles              | 2  | -0.03 |
| Caudate Nucleus Neurofibrillary Tangles  | 1 | Locus Ceruleus Pigmentary Incontinence                | 35 | 0.02  |
| Caudate Nucleus Neurofibrillary Tangles  | 1 | Basal Ganglia Neurofibrillary Tangles                 | 1  | -0.02 |
| Caudate Nucleus Neurofibrillary Tangles  | 1 | Dentate Nucleus of Cerebellum Neurofibrillary Tangles | 1  | -0.02 |
| Caudate Nucleus Neurofibrillary Tangles  | 1 | Familial ALS                                          | 1  | -0.02 |
| Caudate Nucleus Neurofibrillary Tangles  | 1 | Infarcts                                              | 1  | -0.02 |
| Caudate Nucleus Neurofibrillary Tangles  | 1 | Loss of Neurons Gyrus                                 | 1  | -0.02 |
| Caudate Nucleus Neurofibrillary Tangles  | 1 | Occipital Cortex Neurofibrillary Tangles              | 1  | -0.02 |
| Caudate Nucleus Neurofibrillary Tangles  | 1 | Parietal Cortex Neurofibrillary Tangles               | 1  | -0.02 |
| Caudate Nucleus Neurofibrillary Tangles  | 1 | Brain Mass                                            | 46 | 0.01  |
| Cingulate Cortex Neurofibrillary Tangles | 2 | Loss of Neurons Amygdala                              | 2  | 0.52  |
| Cingulate Cortex Neurofibrillary Tangles | 2 | Temporal Cortex Neurofibrillary Tangles               | 7  | 0.44  |
| Cingulate Cortex Neurofibrillary Tangles | 2 | Insular Cortex Neurofibrillary Tangles                | 10 | 0.37  |
| Cingulate Cortex Neurofibrillary Tangles | 2 | Loss of Neurons Dentate Nucleus                       | 8  | 0.32  |
| Cingulate Cortex Neurofibrillary Tangles | 2 | FTLD in Final Diagnosis                               | 12 | 0.31  |
| Cingulate Cortex Neurofibrillary Tangles | 2 | Loss Purkinje Cells                                   | 39 | 0.30  |
| Cingulate Cortex Neurofibrillary Tangles | 2 | Substantia Nigra Neurofibrillary Tangles              | 6  | 0.30  |
| Cingulate Cortex Neurofibrillary Tangles | 2 | Denervation                                           | 31 | 0.24  |
| Cingulate Cortex Neurofibrillary Tangles | 2 | Amygdala Neurofibrillary Tangles                      | 20 | 0.23  |
| Cingulate Cortex Neurofibrillary Tangles | 2 | Age of Death                                          | 46 | 0.18  |
| Cingulate Cortex Neurofibrillary Tangles | 2 | Onset Age                                             | 46 | 0.18  |
| Cingulate Cortex Neurofibrillary Tangles | 2 | Hypothalamus Neurofibrillary Tangles                  | 10 | 0.18  |

|                                          |   |                                           |    |       |
|------------------------------------------|---|-------------------------------------------|----|-------|
| Cingulate Cortex Neurofibrillary Tangles | 2 | Diagnosis Age                             | 46 | 0.17  |
| Cingulate Cortex Neurofibrillary Tangles | 2 | Entorhinal Cortex Neurofibrillary Tangles | 28 | 0.16  |
| Cingulate Cortex Neurofibrillary Tangles | 2 | Gender (1 = m, 2 = f)                     | 46 | 0.16  |
| Cingulate Cortex Neurofibrillary Tangles | 2 | Loss of Neurons Anterior Horns            | 20 | 0.15  |
| Cingulate Cortex Neurofibrillary Tangles | 2 | Brain Mass                                | 46 | -0.15 |
| Cingulate Cortex Neurofibrillary Tangles | 2 | Nucleus Basalis Neurofibrillary Tangles   | 20 | 0.12  |
| Cingulate Cortex Neurofibrillary Tangles | 2 | Locus Ceruleus Neurofibrillary Tangles    | 14 | 0.12  |
| Cingulate Cortex Neurofibrillary Tangles | 2 | Ventral Nerve Roots Atrophy               | 30 | 0.11  |
| Cingulate Cortex Neurofibrillary Tangles | 2 | AD in Final Diagnosis                     | 10 | -0.10 |
| Cingulate Cortex Neurofibrillary Tangles | 2 | Disease Duration                          | 46 | -0.08 |
| Cingulate Cortex Neurofibrillary Tangles | 2 | Thalamus Neurofibrillary Tangles          | 7  | -0.07 |
| Cingulate Cortex Neurofibrillary Tangles | 2 | Loss of Neurons Substantia Nigra          | 6  | 0.07  |
| Cingulate Cortex Neurofibrillary Tangles | 2 | Hippocampus Neurofibrillary Tangles       | 17 | 0.07  |
| Cingulate Cortex Neurofibrillary Tangles | 2 | Loss of Neurons Locus Ceruleus            | 6  | -0.07 |
| Cingulate Cortex Neurofibrillary Tangles | 2 | Lewy Body Formation                       | 5  | -0.06 |
| Cingulate Cortex Neurofibrillary Tangles | 2 | Frontal Cortex Neurofibrillary Tangles    | 6  | -0.06 |
| Cingulate Cortex Neurofibrillary Tangles | 2 | Loss of Neurons Medulla                   | 15 | -0.06 |
| Cingulate Cortex Neurofibrillary Tangles | 2 | FTD in Final Diagnosis                    | 3  | -0.05 |
| Cingulate Cortex Neurofibrillary Tangles | 2 | Microinfarcts                             | 3  | -0.05 |
| Cingulate Cortex Neurofibrillary Tangles | 2 | Diaphragm Atrophy                         | 25 | 0.04  |
| Cingulate Cortex Neurofibrillary Tangles | 2 | Diagnostic Delay                          | 46 | -0.04 |
| Cingulate Cortex Neurofibrillary Tangles | 2 | Lewy Body Disease in Final Diagnosis      | 2  | -0.04 |
| Cingulate Cortex Neurofibrillary Tangles | 2 | Locus Ceruleus Pigmentary Incontinence    | 35 | 0.03  |
| Cingulate Cortex Neurofibrillary Tangles | 2 | Paraspinal Muscle Fiber Atrophy           | 26 | 0.03  |

|                                          |    |                                                       |    |       |
|------------------------------------------|----|-------------------------------------------------------|----|-------|
| Cingulate Cortex Neurofibrillary Tangles | 2  | Anterior Corticospinal Tract Degeneration             | 33 | 0.03  |
| Cingulate Cortex Neurofibrillary Tangles | 2  | Familial ALS                                          | 1  | -0.03 |
| Cingulate Cortex Neurofibrillary Tangles | 2  | Infarcts                                              | 1  | -0.03 |
| Cingulate Cortex Neurofibrillary Tangles | 2  | Occipital Cortex Neurofibrillary Tangles              | 1  | -0.03 |
| Cingulate Cortex Neurofibrillary Tangles | 2  | Parietal Cortex Neurofibrillary Tangles               | 1  | -0.03 |
| Cingulate Cortex Neurofibrillary Tangles | 2  | Dentate Nucleus of Cerebellum Neurofibrillary Tangles | 1  | -0.03 |
| Cingulate Cortex Neurofibrillary Tangles | 2  | Loss of Neurons Gyrus                                 | 1  | -0.03 |
| Cingulate Cortex Neurofibrillary Tangles | 2  | Loss of Neurons Spinal Cord                           | 11 | -0.02 |
| Cingulate Cortex Neurofibrillary Tangles | 2  | Tau Pathology/Tauopathy                               | 8  | 0.02  |
| Cingulate Cortex Neurofibrillary Tangles | 2  | Betz Cell Loss                                        | 35 | -0.02 |
| Cingulate Cortex Neurofibrillary Tangles | 2  | Substantia Nigra Pigmentary Incontinence              | 32 | -0.02 |
| Cingulate Cortex Neurofibrillary Tangles | 2  | Lateral Corticospinal Tract Degeneration              | 41 | -0.01 |
| Denervation                              | 31 | Tau Pathology/Tauopathy                               | 8  | 0.31  |
| Denervation                              | 31 | Disease Duration                                      | 46 | 0.26  |
| Denervation                              | 31 | Familial ALS                                          | 1  | 0.21  |
| Denervation                              | 31 | Loss of Neurons Medulla                               | 15 | -0.21 |
| Denervation                              | 31 | Brain Mass                                            | 46 | -0.18 |
| Denervation                              | 31 | FTD in Final Diagnosis                                | 3  | 0.16  |
| Denervation                              | 31 | Diagnostic Delay                                      | 46 | 0.16  |
| Denervation                              | 31 | Infarcts                                              | 1  | -0.15 |
| Denervation                              | 31 | Loss of Neurons Gyrus                                 | 1  | -0.15 |
| Denervation                              | 31 | Loss of Neurons Anterior Horns                        | 20 | 0.14  |
| Denervation                              | 31 | Gender (1 = m, 2 = f)                                 | 46 | 0.14  |
| Denervation                              | 31 | Loss of Neurons Spinal Cord                           | 11 | 0.13  |
| Denervation                              | 31 | Loss of Neurons Locus Ceruleus                        | 6  | -0.11 |
| Denervation                              | 31 | Loss of Neurons Dentate Nucleus                       | 8  | 0.07  |
| Denervation                              | 31 | Loss of Neurons Amygdala                              | 2  | 0.07  |
| Denervation                              | 31 | Lewy Body Disease in Final Diagnosis                  | 2  | 0.05  |
| Denervation                              | 31 | Onset Age                                             | 46 | -0.04 |
| Denervation                              | 31 | Diagnosis Age                                         | 46 | -0.02 |
| Denervation                              | 31 | AD in Final Diagnosis                                 | 10 | 0.02  |
| Denervation                              | 31 | FTLD in Final Diagnosis                               | 12 | -0.02 |
| Denervation                              | 31 | Age of Death                                          | 46 | 0.02  |
| Denervation                              | 31 | Loss of Neurons Substantia Nigra                      | 6  | -0.01 |
| Denervation                              | 31 | Microinfarcts                                         | 3  | 0.01  |

|                                                       |   |                                          |    |       |
|-------------------------------------------------------|---|------------------------------------------|----|-------|
| Dentate Nucleus of Cerebellum Neurofibrillary Tangles | 1 | Hypothalamus Neurofibrillary Tangles     | 10 | 0.41  |
| Dentate Nucleus of Cerebellum Neurofibrillary Tangles | 1 | Loss of Neurons Dentate Nucleus          | 8  | 0.35  |
| Dentate Nucleus of Cerebellum Neurofibrillary Tangles | 1 | Nucleus Basalis Neurofibrillary Tangles  | 20 | 0.27  |
| Dentate Nucleus of Cerebellum Neurofibrillary Tangles | 1 | Loss of Neurons Anterior Horns           | 20 | 0.27  |
| Dentate Nucleus of Cerebellum Neurofibrillary Tangles | 1 | Brain Mass                               | 46 | 0.27  |
| Dentate Nucleus of Cerebellum Neurofibrillary Tangles | 1 | Loss of Neurons Medulla                  | 15 | 0.27  |
| Dentate Nucleus of Cerebellum Neurofibrillary Tangles | 1 | Diagnostic Delay                         | 46 | 0.26  |
| Dentate Nucleus of Cerebellum Neurofibrillary Tangles | 1 | FTLD in Final Diagnosis                  | 12 | 0.25  |
| Dentate Nucleus of Cerebellum Neurofibrillary Tangles | 1 | Substantia Nigra Neurofibrillary Tangles | 6  | 0.23  |
| Dentate Nucleus of Cerebellum Neurofibrillary Tangles | 1 | Temporal Cortex Neurofibrillary Tangles  | 7  | 0.17  |
| Dentate Nucleus of Cerebellum Neurofibrillary Tangles | 1 | Disease Duration                         | 46 | 0.15  |
| Dentate Nucleus of Cerebellum Neurofibrillary Tangles | 1 | Diaphragm Atrophy                        | 25 | -0.15 |
| Dentate Nucleus of Cerebellum Neurofibrillary Tangles | 1 | Paraspinal Muscle Fiber Atrophy          | 26 | -0.15 |
| Dentate Nucleus of Cerebellum Neurofibrillary Tangles | 1 | Insular Cortex Neurofibrillary Tangles   | 10 | 0.13  |
| Dentate Nucleus of Cerebellum Neurofibrillary Tangles | 1 | Gender (1 = m, 2 = f)                    | 46 | -0.11 |
| Dentate Nucleus of Cerebellum Neurofibrillary Tangles | 1 | Hippocampus Neurofibrillary Tangles      | 17 | 0.10  |

|                                                       |   |                                        |    |       |
|-------------------------------------------------------|---|----------------------------------------|----|-------|
| Dentate Nucleus of Cerebellum Neurofibrillary Tangles | 1 | Locus Ceruleus Neurofibrillary Tangles | 14 | 0.09  |
| Dentate Nucleus of Cerebellum Neurofibrillary Tangles | 1 | Betz Cell Loss                         | 35 | -0.08 |
| Dentate Nucleus of Cerebellum Neurofibrillary Tangles | 1 | AD in Final Diagnosis                  | 10 | -0.08 |
| Dentate Nucleus of Cerebellum Neurofibrillary Tangles | 1 | Loss Purkinje Cells                    | 39 | -0.08 |
| Dentate Nucleus of Cerebellum Neurofibrillary Tangles | 1 | Loss of Neurons Spinal Cord            | 11 | -0.08 |
| Dentate Nucleus of Cerebellum Neurofibrillary Tangles | 1 | Tau Pathology/Tauopathy                | 8  | -0.07 |
| Dentate Nucleus of Cerebellum Neurofibrillary Tangles | 1 | Thalamus Neurofibrillary Tangles       | 7  | -0.06 |
| Dentate Nucleus of Cerebellum Neurofibrillary Tangles | 1 | Denervation                            | 31 | -0.06 |
| Dentate Nucleus of Cerebellum Neurofibrillary Tangles | 1 | Loss of Neurons Substantia Nigra       | 6  | -0.06 |
| Dentate Nucleus of Cerebellum Neurofibrillary Tangles | 1 | Loss of Neurons Locus Ceruleus         | 6  | -0.05 |
| Dentate Nucleus of Cerebellum Neurofibrillary Tangles | 1 | Lewy Body Formation                    | 5  | -0.05 |
| Dentate Nucleus of Cerebellum Neurofibrillary Tangles | 1 | Amygdala Neurofibrillary Tangles       | 20 | 0.05  |
| Dentate Nucleus of Cerebellum Neurofibrillary Tangles | 1 | Frontal Cortex Neurofibrillary Tangles | 6  | -0.05 |
| Dentate Nucleus of Cerebellum Neurofibrillary Tangles | 1 | FTD in Final Diagnosis                 | 3  | -0.04 |
| Dentate Nucleus of Cerebellum Neurofibrillary Tangles | 1 | Microinfarcts                          | 3  | -0.04 |
| Dentate Nucleus of Cerebellum Neurofibrillary Tangles | 1 | Age of Death                           | 46 | 0.03  |



|                                                       |    |                                           |    |       |
|-------------------------------------------------------|----|-------------------------------------------|----|-------|
| Dentate Nucleus of Cerebellum Neurofibrillary Tangles | 1  | Lewy Body Disease in Final Diagnosis      | 2  | -0.03 |
| Dentate Nucleus of Cerebellum Neurofibrillary Tangles | 1  | Loss of Neurons Amygdala                  | 2  | -0.03 |
| Dentate Nucleus of Cerebellum Neurofibrillary Tangles | 1  | Diagnosis Age                             | 46 | 0.03  |
| Dentate Nucleus of Cerebellum Neurofibrillary Tangles | 1  | Locus Ceruleus Pigmentary Incontinence    | 35 | 0.02  |
| Dentate Nucleus of Cerebellum Neurofibrillary Tangles | 1  | Anterior Corticospinal Tract Degeneration | 33 | 0.02  |
| Dentate Nucleus of Cerebellum Neurofibrillary Tangles | 1  | Familial ALS                              | 1  | -0.02 |
| Dentate Nucleus of Cerebellum Neurofibrillary Tangles | 1  | Infarcts                                  | 1  | -0.02 |
| Dentate Nucleus of Cerebellum Neurofibrillary Tangles | 1  | Loss of Neurons Gyrus                     | 1  | -0.02 |
| Dentate Nucleus of Cerebellum Neurofibrillary Tangles | 1  | Parietal Cortex Neurofibrillary Tangles   | 1  | -0.02 |
| Dentate Nucleus of Cerebellum Neurofibrillary Tangles | 1  | Lateral Corticospinal Tract Degeneration  | 41 | -0.01 |
| Dentate Nucleus of Cerebellum Neurofibrillary Tangles | 1  | Ventral Nerve Roots Atrophy               | 30 | 0.01  |
| Dentate Nucleus of Cerebellum Neurofibrillary Tangles | 1  | Entorhinal Cortex Neurofibrillary Tangles | 28 | -0.01 |
| Dentate Nucleus of Cerebellum Neurofibrillary Tangles | 1  | Onset Age                                 | 46 | 0.00  |
| Dentate Nucleus of Cerebellum Neurofibrillary Tangles | 1  | Substantia Nigra Pigmentary Incontinence  | 32 | 0.00  |
| Diagnosis Age                                         | 46 | Onset Age                                 | 46 | 0.99  |
| Diagnosis Age                                         | 46 | Age of Death                              | 46 | 0.99  |
| Diagnosis Age                                         | 46 | Gender (1 = m, 2 = f)                     | 46 | -0.01 |
| Diagnostic Delay                                      | 46 | Gender (1 = m, 2 = f)                     | 46 | -0.22 |
| Diagnostic Delay                                      | 46 | Onset Age                                 | 46 | -0.16 |
| Diagnostic Delay                                      | 46 | Age of Death                              | 46 | -0.04 |
| Diagnostic Delay                                      | 46 | Diagnosis Age                             | 46 | -0.04 |

|                                           |    |                                      |    |       |
|-------------------------------------------|----|--------------------------------------|----|-------|
| Diaphragm Atrophy                         | 25 | Denervation                          | 31 | 0.54  |
| Diaphragm Atrophy                         | 25 | Loss of Neurons Spinal Cord          | 11 | 0.35  |
| Diaphragm Atrophy                         | 25 | Tau Pathology/Tauopathy              | 8  | 0.27  |
| Diaphragm Atrophy                         | 25 | Ventral Nerve Roots Atrophy          | 30 | 0.24  |
| Diaphragm Atrophy                         | 25 | FTLD in Final Diagnosis              | 12 | -0.20 |
| Diaphragm Atrophy                         | 25 | FTD in Final Diagnosis               | 3  | 0.16  |
| Diaphragm Atrophy                         | 25 | Infarcts                             | 1  | -0.15 |
| Diaphragm Atrophy                         | 25 | Disease Duration                     | 46 | 0.14  |
| Diaphragm Atrophy                         | 25 | AD in Final Diagnosis                | 10 | 0.14  |
| Diaphragm Atrophy                         | 25 | Loss of Neurons Medulla              | 15 | -0.14 |
| Diaphragm Atrophy                         | 25 | Gender (1 = m, 2 = f)                | 46 | 0.13  |
| Diaphragm Atrophy                         | 25 | Microinfarcts                        | 3  | -0.12 |
| Diaphragm Atrophy                         | 25 | Loss of Neurons Amygdala             | 2  | 0.12  |
| Diaphragm Atrophy                         | 25 | Loss of Neurons Anterior Horns       | 20 | 0.10  |
| Diaphragm Atrophy                         | 25 | Loss of Neurons Substantia Nigra     | 6  | 0.10  |
| Diaphragm Atrophy                         | 25 | Familial ALS                         | 1  | 0.09  |
| Diaphragm Atrophy                         | 25 | Loss of Neurons Gyrus                | 1  | 0.09  |
| Diaphragm Atrophy                         | 25 | Loss of Neurons Dentate Nucleus      | 8  | 0.08  |
| Diaphragm Atrophy                         | 25 | Diagnosis Age                        | 46 | -0.07 |
| Diaphragm Atrophy                         | 25 | Onset Age                            | 46 | -0.07 |
| Diaphragm Atrophy                         | 25 | Brain Mass                           | 46 | 0.06  |
| Diaphragm Atrophy                         | 25 | Loss of Neurons Locus Ceruleus       | 6  | 0.06  |
| Diaphragm Atrophy                         | 25 | Lewy Body Disease in Final Diagnosis | 2  | -0.04 |
| Diaphragm Atrophy                         | 25 | Diagnostic Delay                     | 46 | -0.04 |
| Diaphragm Atrophy                         | 25 | Age of Death                         | 46 | -0.04 |
| Disease Duration                          | 46 | Diagnostic Delay                     | 46 | 0.58  |
| Disease Duration                          | 46 | Onset Age                            | 46 | -0.58 |
| Disease Duration                          | 46 | Diagnosis Age                        | 46 | -0.51 |
| Disease Duration                          | 46 | Age of Death                         | 46 | -0.40 |
| Disease Duration                          | 46 | Gender (1 = m, 2 = f)                | 46 | -0.11 |
| Entorhinal Cortex Neurofibrillary Tangles | 28 | Amygdala Neurofibrillary Tangles     | 20 | 0.67  |
| Entorhinal Cortex Neurofibrillary Tangles | 28 | Hippocampus Neurofibrillary Tangles  | 17 | 0.65  |
| Entorhinal Cortex Neurofibrillary Tangles | 28 | Onset Age                            | 46 | 0.42  |
| Entorhinal Cortex Neurofibrillary Tangles | 28 | Diagnosis Age                        | 46 | 0.41  |
| Entorhinal Cortex Neurofibrillary Tangles | 28 | Age of Death                         | 46 | 0.40  |
| Entorhinal Cortex Neurofibrillary Tangles | 28 | FTLD in Final Diagnosis              | 12 | 0.40  |
| Entorhinal Cortex Neurofibrillary Tangles | 28 | AD in Final Diagnosis                | 10 | 0.38  |
| Entorhinal Cortex Neurofibrillary Tangles | 28 | Loss Purkinje Cells                  | 39 | 0.38  |

|                                           |    |                                           |    |       |
|-------------------------------------------|----|-------------------------------------------|----|-------|
| Entorhinal Cortex Neurofibrillary Tangles | 28 | Disease Duration                          | 46 | -0.31 |
| Entorhinal Cortex Neurofibrillary Tangles | 28 | Locus Ceruleus Pigmentary Incontinence    | 35 | 0.30  |
| Entorhinal Cortex Neurofibrillary Tangles | 28 | Microinfarcts                             | 3  | 0.27  |
| Entorhinal Cortex Neurofibrillary Tangles | 28 | Ventral Nerve Roots Atrophy               | 30 | 0.26  |
| Entorhinal Cortex Neurofibrillary Tangles | 28 | Betz Cell Loss                            | 35 | 0.25  |
| Entorhinal Cortex Neurofibrillary Tangles | 28 | Infarcts                                  | 1  | 0.18  |
| Entorhinal Cortex Neurofibrillary Tangles | 28 | Gender (1 = m, 2 = f)                     | 46 | 0.17  |
| Entorhinal Cortex Neurofibrillary Tangles | 28 | Denervation                               | 31 | 0.15  |
| Entorhinal Cortex Neurofibrillary Tangles | 28 | Diagnostic Delay                          | 46 | -0.14 |
| Entorhinal Cortex Neurofibrillary Tangles | 28 | Loss of Neurons Locus Ceruleus            | 6  | -0.14 |
| Entorhinal Cortex Neurofibrillary Tangles | 28 | Anterior Corticospinal Tract Degeneration | 33 | 0.14  |
| Entorhinal Cortex Neurofibrillary Tangles | 28 | Familial ALS                              | 1  | 0.14  |
| Entorhinal Cortex Neurofibrillary Tangles | 28 | Loss of Neurons Gyrus                     | 1  | 0.14  |
| Entorhinal Cortex Neurofibrillary Tangles | 28 | Loss of Neurons Dentate Nucleus           | 8  | 0.12  |
| Entorhinal Cortex Neurofibrillary Tangles | 28 | Substantia Nigra Pigmentary Incontinence  | 32 | 0.11  |
| Entorhinal Cortex Neurofibrillary Tangles | 28 | Loss of Neurons Spinal Cord               | 11 | 0.11  |
| Entorhinal Cortex Neurofibrillary Tangles | 28 | Brain Mass                                | 46 | -0.10 |
| Entorhinal Cortex Neurofibrillary Tangles | 28 | Lewy Body Formation                       | 5  | 0.09  |
| Entorhinal Cortex Neurofibrillary Tangles | 28 | FTD in Final Diagnosis                    | 3  | -0.07 |
| Entorhinal Cortex Neurofibrillary Tangles | 28 | Paraspinal Muscle Fiber Atrophy           | 26 | -0.07 |
| Entorhinal Cortex Neurofibrillary Tangles | 28 | Loss of Neurons Anterior Horns            | 20 | 0.07  |
| Entorhinal Cortex Neurofibrillary Tangles | 28 | Lewy Body Disease in Final Diagnosis      | 2  | 0.06  |
| Entorhinal Cortex Neurofibrillary Tangles | 28 | Lateral Corticospinal Tract Degeneration  | 41 | 0.05  |
| Entorhinal Cortex Neurofibrillary Tangles | 28 | Loss of Neurons Substantia Nigra          | 6  | -0.03 |

|                                           |    |                                         |    |       |
|-------------------------------------------|----|-----------------------------------------|----|-------|
| Entorhinal Cortex Neurofibrillary Tangles | 28 | Tau Pathology/Tauopathy                 | 8  | -0.03 |
| Entorhinal Cortex Neurofibrillary Tangles | 28 | Loss of Neurons Amygdala                | 2  | -0.03 |
| Entorhinal Cortex Neurofibrillary Tangles | 28 | Diaphragm Atrophy                       | 25 | 0.03  |
| Entorhinal Cortex Neurofibrillary Tangles | 28 | Loss of Neurons Medulla                 | 15 | -0.02 |
| Familial ALS                              | 1  | Disease Duration                        | 46 | -0.20 |
| Familial ALS                              | 1  | Gender (1 = m, 2 = f)                   | 46 | 0.19  |
| Familial ALS                              | 1  | Brain Mass                              | 46 | -0.16 |
| Familial ALS                              | 1  | Diagnostic Delay                        | 46 | -0.12 |
| Familial ALS                              | 1  | Onset Age                               | 46 | 0.11  |
| Familial ALS                              | 1  | Diagnosis Age                           | 46 | 0.09  |
| Familial ALS                              | 1  | FTLD in Final Diagnosis                 | 12 | -0.09 |
| Familial ALS                              | 1  | AD in Final Diagnosis                   | 10 | -0.08 |
| Familial ALS                              | 1  | Age of Death                            | 46 | 0.07  |
| Familial ALS                              | 1  | Tau Pathology/Tauopathy                 | 8  | -0.07 |
| Familial ALS                              | 1  | Microinfarcts                           | 3  | -0.04 |
| Familial ALS                              | 1  | FTD in Final Diagnosis                  | 3  | -0.04 |
| Familial ALS                              | 1  | Lewy Body Disease in Final Diagnosis    | 2  | -0.03 |
| Familial ALS                              | 1  | Infarcts                                | 1  | -0.02 |
| Frontal Cortex Neurofibrillary Tangles    | 6  | Loss of Neurons Amygdala                | 2  | 0.37  |
| Frontal Cortex Neurofibrillary Tangles    | 6  | Loss of Neurons Spinal Cord             | 11 | 0.30  |
| Frontal Cortex Neurofibrillary Tangles    | 6  | Lewy Body Disease in Final Diagnosis    | 2  | 0.30  |
| Frontal Cortex Neurofibrillary Tangles    | 6  | Tau Pathology/Tauopathy                 | 8  | 0.28  |
| Frontal Cortex Neurofibrillary Tangles    | 6  | Diaphragm Atrophy                       | 25 | 0.27  |
| Frontal Cortex Neurofibrillary Tangles    | 6  | Locus Ceruleus Neurofibrillary Tangles  | 14 | 0.27  |
| Frontal Cortex Neurofibrillary Tangles    | 6  | Locus Ceruleus Pigmentary Incontinence  | 35 | 0.27  |
| Frontal Cortex Neurofibrillary Tangles    | 6  | Nucleus Basalis Neurofibrillary Tangles | 20 | 0.22  |
| Frontal Cortex Neurofibrillary Tangles    | 6  | Paraspinal Muscle Fiber Atrophy         | 26 | 0.21  |
| Frontal Cortex Neurofibrillary Tangles    | 6  | Gender (1 = m, 2 = f)                   | 46 | -0.20 |
| Frontal Cortex Neurofibrillary Tangles    | 6  | Brain Mass                              | 46 | 0.20  |
| Frontal Cortex Neurofibrillary Tangles    | 6  | Diagnosis Age                           | 46 | -0.19 |

|                                        |   |                                           |    |       |
|----------------------------------------|---|-------------------------------------------|----|-------|
| Frontal Cortex Neurofibrillary Tangles | 6 | Lewy Body Formation                       | 5  | 0.18  |
| Frontal Cortex Neurofibrillary Tangles | 6 | Onset Age                                 | 46 | -0.18 |
| Frontal Cortex Neurofibrillary Tangles | 6 | Age of Death                              | 46 | -0.18 |
| Frontal Cortex Neurofibrillary Tangles | 6 | Hippocampus Neurofibrillary Tangles       | 17 | -0.17 |
| Frontal Cortex Neurofibrillary Tangles | 6 | Denervation                               | 31 | 0.15  |
| Frontal Cortex Neurofibrillary Tangles | 6 | Loss of Neurons Anterior Horns            | 20 | -0.14 |
| Frontal Cortex Neurofibrillary Tangles | 6 | FTLD in Final Diagnosis                   | 12 | -0.14 |
| Frontal Cortex Neurofibrillary Tangles | 6 | Loss of Neurons Dentate Nucleus           | 8  | 0.14  |
| Frontal Cortex Neurofibrillary Tangles | 6 | Loss of Neurons Substantia Nigra          | 6  | -0.12 |
| Frontal Cortex Neurofibrillary Tangles | 6 | Loss of Neurons Locus Ceruleus            | 6  | -0.12 |
| Frontal Cortex Neurofibrillary Tangles | 6 | FTD in Final Diagnosis                    | 3  | -0.09 |
| Frontal Cortex Neurofibrillary Tangles | 6 | AD in Final Diagnosis                     | 10 | -0.08 |
| Frontal Cortex Neurofibrillary Tangles | 6 | Lateral Corticospinal Tract Degeneration  | 41 | -0.08 |
| Frontal Cortex Neurofibrillary Tangles | 6 | Disease Duration                          | 46 | 0.08  |
| Frontal Cortex Neurofibrillary Tangles | 6 | Substantia Nigra Neurofibrillary Tangles  | 6  | 0.08  |
| Frontal Cortex Neurofibrillary Tangles | 6 | Diagnostic Delay                          | 46 | -0.07 |
| Frontal Cortex Neurofibrillary Tangles | 6 | Substantia Nigra Pigmentary Incontinence  | 32 | -0.07 |
| Frontal Cortex Neurofibrillary Tangles | 6 | Entorhinal Cortex Neurofibrillary Tangles | 28 | -0.06 |
| Frontal Cortex Neurofibrillary Tangles | 6 | Infarcts                                  | 1  | -0.05 |
| Frontal Cortex Neurofibrillary Tangles | 6 | Familial ALS                              | 1  | -0.05 |
| Frontal Cortex Neurofibrillary Tangles | 6 | Loss of Neurons Gyrus                     | 1  | -0.05 |
| Frontal Cortex Neurofibrillary Tangles | 6 | Betz Cell Loss                            | 35 | -0.05 |
| Frontal Cortex Neurofibrillary Tangles | 6 | Loss of Neurons Medulla                   | 15 | 0.03  |
| Frontal Cortex Neurofibrillary Tangles | 6 | Microinfarcts                             | 3  | 0.02  |

|                                        |    |                                           |    |       |
|----------------------------------------|----|-------------------------------------------|----|-------|
| Frontal Cortex Neurofibrillary Tangles | 6  | Ventral Nerve Roots Atrophy               | 30 | 0.02  |
| Frontal Cortex Neurofibrillary Tangles | 6  | Amygdala Neurofibrillary Tangles          | 20 | -0.01 |
| Frontal Cortex Neurofibrillary Tangles | 6  | Anterior Corticospinal Tract Degeneration | 33 | -0.01 |
| Frontal Cortex Neurofibrillary Tangles | 6  | Loss Purkinje Cells                       | 39 | 0.00  |
| FTD in Final Diagnosis                 | 3  | Diagnostic Delay                          | 46 | 0.31  |
| FTD in Final Diagnosis                 | 3  | Brain Mass                                | 46 | 0.28  |
| FTD in Final Diagnosis                 | 3  | Gender (1 = m, 2 = f)                     | 46 | -0.20 |
| FTD in Final Diagnosis                 | 3  | AD in Final Diagnosis                     | 10 | -0.14 |
| FTD in Final Diagnosis                 | 3  | Disease Duration                          | 46 | 0.08  |
| FTD in Final Diagnosis                 | 3  | Onset Age                                 | 46 | -0.08 |
| FTD in Final Diagnosis                 | 3  | Age of Death                              | 46 | -0.07 |
| FTD in Final Diagnosis                 | 3  | Diagnosis Age                             | 46 | -0.04 |
| FTLD in Final Diagnosis                | 12 | Age of Death                              | 46 | 0.30  |
| FTLD in Final Diagnosis                | 12 | Diagnosis Age                             | 46 | 0.30  |
| FTLD in Final Diagnosis                | 12 | Onset Age                                 | 46 | 0.27  |
| FTLD in Final Diagnosis                | 12 | Diagnostic Delay                          | 46 | 0.20  |
| FTLD in Final Diagnosis                | 12 | FTD in Final Diagnosis                    | 3  | -0.16 |
| FTLD in Final Diagnosis                | 12 | Brain Mass                                | 46 | -0.10 |
| FTLD in Final Diagnosis                | 12 | AD in Final Diagnosis                     | 10 | 0.05  |
| FTLD in Final Diagnosis                | 12 | Gender (1 = m, 2 = f)                     | 46 | -0.04 |
| FTLD in Final Diagnosis                | 12 | Disease Duration                          | 46 | -0.01 |
| General Spinal Cord Atrophy            | 4  | Basal Ganglia Neurofibrillary Tangles     | 1  | 0.40  |
| General Spinal Cord Atrophy            | 4  | Neocortex Neurofibrillary Tangles         | 2  | 0.29  |
| General Spinal Cord Atrophy            | 4  | Age of Death                              | 46 | -0.23 |
| General Spinal Cord Atrophy            | 4  | Gender (1 = m, 2 = f)                     | 46 | -0.22 |
| General Spinal Cord Atrophy            | 4  | Diagnosis Age                             | 46 | -0.19 |
| General Spinal Cord Atrophy            | 4  | TDP-43                                    | 37 | -0.18 |
| General Spinal Cord Atrophy            | 4  | FTD in Final Diagnosis                    | 3  | 0.18  |
| General Spinal Cord Atrophy            | 4  | Substantia Nigra Neurofibrillary Tangles  | 6  | 0.18  |
| General Spinal Cord Atrophy            | 4  | Onset Age                                 | 46 | -0.18 |
| General Spinal Cord Atrophy            | 4  | Ventral Nerve Roots Atrophy               | 30 | -0.17 |
| General Spinal Cord Atrophy            | 4  | Lateral Corticospinal Tract Degeneration  | 41 | -0.17 |

|                             |   |                                             |    |       |
|-----------------------------|---|---------------------------------------------|----|-------|
| General Spinal Cord Atrophy | 4 | AD in Final Diagnosis                       | 10 | -0.15 |
| General Spinal Cord Atrophy | 4 | Loss of Neurons Spinal Cord                 | 11 | -0.15 |
| General Spinal Cord Atrophy | 4 | Hippocampus Neurofibrillary Tangles         | 17 | 0.15  |
| General Spinal Cord Atrophy | 4 | Brain Mass                                  | 46 | 0.15  |
| General Spinal Cord Atrophy | 4 | Disease Duration                            | 46 | -0.14 |
| General Spinal Cord Atrophy | 4 | Insular Cortex Neurofibrillary Tangles      | 10 | -0.13 |
| General Spinal Cord Atrophy | 4 | Betz Cell Loss                              | 35 | -0.13 |
| General Spinal Cord Atrophy | 4 | Denervation                                 | 31 | -0.13 |
| General Spinal Cord Atrophy | 4 | Loss of Neurons Dentate Nucleus             | 8  | -0.13 |
| General Spinal Cord Atrophy | 4 | Brain Atrophy                               | 9  | -0.13 |
| General Spinal Cord Atrophy | 4 | Loss Purkinje Cells                         | 39 | -0.11 |
| General Spinal Cord Atrophy | 4 | Temporal Cortex Neurofibrillary Tangles     | 7  | -0.10 |
| General Spinal Cord Atrophy | 4 | Ventricular Dilatation                      | 6  | -0.10 |
| General Spinal Cord Atrophy | 4 | Lewy Body Disease in Final Diagnosis        | 2  | 0.10  |
| General Spinal Cord Atrophy | 4 | Frontal Cortex Neurofibrillary Tangles      | 6  | -0.09 |
| General Spinal Cord Atrophy | 4 | Diagnostic Delay                            | 46 | -0.09 |
| General Spinal Cord Atrophy | 4 | Diaphragm Atrophy                           | 25 | -0.09 |
| General Spinal Cord Atrophy | 4 | Anterior Corticospinal Tract Degeneration   | 33 | -0.08 |
| General Spinal Cord Atrophy | 4 | Microinfarcts                               | 3  | -0.08 |
| General Spinal Cord Atrophy | 4 | Paraspinal Muscle Fiber Atrophy             | 26 | -0.07 |
| General Spinal Cord Atrophy | 4 | Substantia Nigra Pigmentary Incontinence    | 32 | 0.07  |
| General Spinal Cord Atrophy | 4 | Loss of Neurons Amygdala                    | 2  | -0.06 |
| General Spinal Cord Atrophy | 4 | Anterior Horn Cells Neurofibrillary Tangles | 2  | -0.06 |
| General Spinal Cord Atrophy | 4 | Amygdala Neurofibrillary Tangles            | 20 | -0.06 |

|                                     |    |                                                       |    |       |
|-------------------------------------|----|-------------------------------------------------------|----|-------|
| General Spinal Cord Atrophy         | 4  | Entorhinal Cortex Neurofibrillary Tangles             | 28 | 0.05  |
| General Spinal Cord Atrophy         | 4  | Cingulate Cortex Neurofibrillary Tangles              | 2  | -0.05 |
| General Spinal Cord Atrophy         | 4  | Nucleus Basalis Neurofibrillary Tangles               | 20 | -0.05 |
| General Spinal Cord Atrophy         | 4  | FTLD in Final Diagnosis                               | 12 | 0.05  |
| General Spinal Cord Atrophy         | 4  | Loss of Neurons Medulla                               | 15 | 0.05  |
| General Spinal Cord Atrophy         | 4  | Locus Ceruleus Pigmentary Incontinence                | 35 | 0.04  |
| General Spinal Cord Atrophy         | 4  | Familial ALS                                          | 1  | -0.04 |
| General Spinal Cord Atrophy         | 4  | Infarcts                                              | 1  | -0.04 |
| General Spinal Cord Atrophy         | 4  | Parietal Cortex Neurofibrillary Tangles               | 1  | -0.04 |
| General Spinal Cord Atrophy         | 4  | Caudate Nucleus Neurofibrillary Tangles               | 1  | -0.04 |
| General Spinal Cord Atrophy         | 4  | Loss of Neurons Gyrus                                 | 1  | -0.04 |
| General Spinal Cord Atrophy         | 4  | Occipital Cortex Neurofibrillary Tangles              | 1  | -0.04 |
| General Spinal Cord Atrophy         | 4  | Putamen Neurofibrillary Tangles                       | 1  | -0.04 |
| General Spinal Cord Atrophy         | 4  | Dentate Nucleus of Cerebellum Neurofibrillary Tangles | 1  | -0.04 |
| General Spinal Cord Atrophy         | 4  | Tau Pathology/Tauopathy                               | 8  | 0.04  |
| General Spinal Cord Atrophy         | 4  | Locus Ceruleus Neurofibrillary Tangles                | 14 | 0.03  |
| General Spinal Cord Atrophy         | 4  | Lewy Body Formation                                   | 5  | 0.03  |
| General Spinal Cord Atrophy         | 4  | Hypothalamus Neurofibrillary Tangles                  | 10 | -0.02 |
| General Spinal Cord Atrophy         | 4  | Loss of Neurons Locus Ceruleus                        | 6  | 0.02  |
| General Spinal Cord Atrophy         | 4  | Thalamus Neurofibrillary Tangles                      | 7  | 0.02  |
| General Spinal Cord Atrophy         | 4  | Loss of Neurons Anterior Horns                        | 20 | 0.02  |
| General Spinal Cord Atrophy         | 4  | Loss of Neurons Substantia Nigra                      | 6  | 0.00  |
| General Spinal Cord Atrophy         | 4  | Atherosclerosis                                       | 16 | 0.00  |
| Hippocampus Neurofibrillary Tangles | 17 | AD in Final Diagnosis                                 | 10 | 0.57  |



|                                     |    |                                           |    |       |
|-------------------------------------|----|-------------------------------------------|----|-------|
| Hippocampus Neurofibrillary Tangles | 17 | Locus Ceruleus Pigmentary Incontinence    | 35 | 0.37  |
| Hippocampus Neurofibrillary Tangles | 17 | FTLD in Final Diagnosis                   | 12 | 0.33  |
| Hippocampus Neurofibrillary Tangles | 17 | Ventral Nerve Roots Atrophy               | 30 | 0.33  |
| Hippocampus Neurofibrillary Tangles | 17 | Onset Age                                 | 46 | 0.33  |
| Hippocampus Neurofibrillary Tangles | 17 | Diagnosis Age                             | 46 | 0.31  |
| Hippocampus Neurofibrillary Tangles | 17 | Age of Death                              | 46 | 0.31  |
| Hippocampus Neurofibrillary Tangles | 17 | Loss Purkinje Cells                       | 39 | 0.26  |
| Hippocampus Neurofibrillary Tangles | 17 | Disease Duration                          | 46 | -0.24 |
| Hippocampus Neurofibrillary Tangles | 17 | Tau Pathology/Tauopathy                   | 8  | -0.23 |
| Hippocampus Neurofibrillary Tangles | 17 | Loss of Neurons Medulla                   | 15 | 0.21  |
| Hippocampus Neurofibrillary Tangles | 17 | Loss of Neurons Dentate Nucleus           | 8  | 0.18  |
| Hippocampus Neurofibrillary Tangles | 17 | Diagnostic Delay                          | 46 | -0.17 |
| Hippocampus Neurofibrillary Tangles | 17 | Betz Cell Loss                            | 35 | 0.16  |
| Hippocampus Neurofibrillary Tangles | 17 | Loss of Neurons Spinal Cord               | 11 | 0.16  |
| Hippocampus Neurofibrillary Tangles | 17 | Lewy Body Disease in Final Diagnosis      | 2  | -0.14 |
| Hippocampus Neurofibrillary Tangles | 17 | Brain Mass                                | 46 | -0.14 |
| Hippocampus Neurofibrillary Tangles | 17 | Loss of Neurons Locus Ceruleus            | 6  | -0.13 |
| Hippocampus Neurofibrillary Tangles | 17 | Anterior Corticospinal Tract Degeneration | 33 | 0.13  |
| Hippocampus Neurofibrillary Tangles | 17 | Diaphragm Atrophy                         | 25 | -0.12 |
| Hippocampus Neurofibrillary Tangles | 17 | Familial ALS                              | 1  | -0.10 |
| Hippocampus Neurofibrillary Tangles | 17 | Infarcts                                  | 1  | 0.10  |
| Hippocampus Neurofibrillary Tangles | 17 | Loss of Neurons Gyrus                     | 1  | -0.10 |
| Hippocampus Neurofibrillary Tangles | 17 | Substantia Nigra Pigmentary Incontinence  | 32 | -0.09 |
| Hippocampus Neurofibrillary Tangles | 17 | Gender (1 = m, 2 = f)                     | 46 | 0.09  |

|                                      |    |                                           |    |       |
|--------------------------------------|----|-------------------------------------------|----|-------|
| Hippocampus Neurofibrillary Tangles  | 17 | Paraspinal Muscle Fiber Atrophy           | 26 | -0.09 |
| Hippocampus Neurofibrillary Tangles  | 17 | Lewy Body Formation                       | 5  | 0.07  |
| Hippocampus Neurofibrillary Tangles  | 17 | Loss of Neurons Anterior Horns            | 20 | -0.06 |
| Hippocampus Neurofibrillary Tangles  | 17 | Loss of Neurons Substantia Nigra          | 6  | -0.06 |
| Hippocampus Neurofibrillary Tangles  | 17 | Microinfarcts                             | 3  | -0.06 |
| Hippocampus Neurofibrillary Tangles  | 17 | FTD in Final Diagnosis                    | 3  | -0.06 |
| Hippocampus Neurofibrillary Tangles  | 17 | Lateral Corticospinal Tract Degeneration  | 41 | 0.04  |
| Hippocampus Neurofibrillary Tangles  | 17 | Denervation                               | 31 | -0.04 |
| Hippocampus Neurofibrillary Tangles  | 17 | Loss of Neurons Amygdala                  | 2  | -0.03 |
| Hypothalamus Neurofibrillary Tangles | 10 | Nucleus Basalis Neurofibrillary Tangles   | 20 | 0.71  |
| Hypothalamus Neurofibrillary Tangles | 10 | Thalamus Neurofibrillary Tangles          | 7  | 0.61  |
| Hypothalamus Neurofibrillary Tangles | 10 | Substantia Nigra Neurofibrillary Tangles  | 6  | 0.60  |
| Hypothalamus Neurofibrillary Tangles | 10 | Locus Ceruleus Neurofibrillary Tangles    | 14 | 0.56  |
| Hypothalamus Neurofibrillary Tangles | 10 | Amygdala Neurofibrillary Tangles          | 20 | 0.54  |
| Hypothalamus Neurofibrillary Tangles | 10 | Entorhinal Cortex Neurofibrillary Tangles | 28 | 0.46  |
| Hypothalamus Neurofibrillary Tangles | 10 | Insular Cortex Neurofibrillary Tangles    | 10 | 0.45  |
| Hypothalamus Neurofibrillary Tangles | 10 | Hippocampus Neurofibrillary Tangles       | 17 | 0.34  |
| Hypothalamus Neurofibrillary Tangles | 10 | FTLD in Final Diagnosis                   | 12 | 0.30  |
| Hypothalamus Neurofibrillary Tangles | 10 | Diagnosis Age                             | 46 | 0.24  |
| Hypothalamus Neurofibrillary Tangles | 10 | Age of Death                              | 46 | 0.23  |
| Hypothalamus Neurofibrillary Tangles | 10 | Onset Age                                 | 46 | 0.22  |
| Hypothalamus Neurofibrillary Tangles | 10 | Ventral Nerve Roots Atrophy               | 30 | 0.22  |
| Hypothalamus Neurofibrillary Tangles | 10 | Locus Ceruleus Pigmentary Incontinence    | 35 | 0.19  |
| Hypothalamus Neurofibrillary Tangles | 10 | Lewy Body Disease in Final Diagnosis      | 2  | 0.19  |

|                                      |    |                                           |    |       |
|--------------------------------------|----|-------------------------------------------|----|-------|
| Hypothalamus Neurofibrillary Tangles | 10 | Brain Mass                                | 46 | 0.19  |
| Hypothalamus Neurofibrillary Tangles | 10 | Loss of Neurons Substantia Nigra          | 6  | -0.19 |
| Hypothalamus Neurofibrillary Tangles | 10 | Loss of Neurons Locus Ceruleus            | 6  | -0.18 |
| Hypothalamus Neurofibrillary Tangles | 10 | Gender (1 = m, 2 = f)                     | 46 | -0.17 |
| Hypothalamus Neurofibrillary Tangles | 10 | AD in Final Diagnosis                     | 10 | 0.15  |
| Hypothalamus Neurofibrillary Tangles | 10 | Loss of Neurons Medulla                   | 15 | -0.15 |
| Hypothalamus Neurofibrillary Tangles | 10 | Diagnostic Delay                          | 46 | 0.14  |
| Hypothalamus Neurofibrillary Tangles | 10 | Tau Pathology/Tauopathy                   | 8  | 0.12  |
| Hypothalamus Neurofibrillary Tangles | 10 | Loss of Neurons Dentate Nucleus           | 8  | 0.09  |
| Hypothalamus Neurofibrillary Tangles | 10 | Familial ALS                              | 1  | -0.07 |
| Hypothalamus Neurofibrillary Tangles | 10 | Parietal Cortex Neurofibrillary Tangles   | 1  | -0.07 |
| Hypothalamus Neurofibrillary Tangles | 10 | Loss of Neurons Gyrus                     | 1  | -0.07 |
| Hypothalamus Neurofibrillary Tangles | 10 | Loss of Neurons Spinal Cord               | 11 | 0.07  |
| Hypothalamus Neurofibrillary Tangles | 10 | Temporal Cortex Neurofibrillary Tangles   | 7  | 0.07  |
| Hypothalamus Neurofibrillary Tangles | 10 | Lewy Body Formation                       | 5  | 0.07  |
| Hypothalamus Neurofibrillary Tangles | 10 | Infarcts                                  | 1  | 0.06  |
| Hypothalamus Neurofibrillary Tangles | 10 | Diaphragm Atrophy                         | 25 | -0.06 |
| Hypothalamus Neurofibrillary Tangles | 10 | Disease Duration                          | 46 | -0.06 |
| Hypothalamus Neurofibrillary Tangles | 10 | Betz Cell Loss                            | 35 | -0.06 |
| Hypothalamus Neurofibrillary Tangles | 10 | Loss of Neurons Amygdala                  | 2  | 0.05  |
| Hypothalamus Neurofibrillary Tangles | 10 | Microinfarcts                             | 3  | -0.05 |
| Hypothalamus Neurofibrillary Tangles | 10 | Frontal Cortex Neurofibrillary Tangles    | 6  | 0.05  |
| Hypothalamus Neurofibrillary Tangles | 10 | Lateral Corticospinal Tract Degeneration  | 41 | -0.04 |
| Hypothalamus Neurofibrillary Tangles | 10 | Anterior Corticospinal Tract Degeneration | 33 | -0.04 |

|                                        |    |                                           |    |       |
|----------------------------------------|----|-------------------------------------------|----|-------|
| Hypothalamus Neurofibrillary Tangles   | 10 | Loss of Neurons Anterior Horns            | 20 | 0.03  |
| Hypothalamus Neurofibrillary Tangles   | 10 | FTD in Final Diagnosis                    | 3  | 0.03  |
| Hypothalamus Neurofibrillary Tangles   | 10 | Loss Purkinje Cells                       | 39 | 0.02  |
| Hypothalamus Neurofibrillary Tangles   | 10 | Substantia Nigra Pigmentary Incontinence  | 32 | -0.02 |
| Hypothalamus Neurofibrillary Tangles   | 10 | Denervation                               | 31 | -0.01 |
| Hypothalamus Neurofibrillary Tangles   | 10 | Paraspinal Muscle Fiber Atrophy           | 26 | 0.00  |
| Infarcts                               | 1  | FTLD in Final Diagnosis                   | 12 | 0.25  |
| Infarcts                               | 1  | Onset Age                                 | 46 | 0.20  |
| Infarcts                               | 1  | Diagnosis Age                             | 46 | 0.20  |
| Infarcts                               | 1  | Age of Death                              | 46 | 0.19  |
| Infarcts                               | 1  | Disease Duration                          | 46 | -0.13 |
| Infarcts                               | 1  | Gender (1 = m, 2 = f)                     | 46 | -0.11 |
| Infarcts                               | 1  | AD in Final Diagnosis                     | 10 | -0.08 |
| Infarcts                               | 1  | Brain Mass                                | 46 | -0.04 |
| Infarcts                               | 1  | Diagnostic Delay                          | 46 | -0.04 |
| Infarcts                               | 1  | FTD in Final Diagnosis                    | 3  | -0.04 |
| Infarcts                               | 1  | Lewy Body Disease in Final Diagnosis      | 2  | -0.03 |
| Insular Cortex Neurofibrillary Tangles | 10 | Temporal Cortex Neurofibrillary Tangles   | 7  | 0.49  |
| Insular Cortex Neurofibrillary Tangles | 10 | Entorhinal Cortex Neurofibrillary Tangles | 28 | 0.46  |
| Insular Cortex Neurofibrillary Tangles | 10 | Amygdala Neurofibrillary Tangles          | 20 | 0.46  |
| Insular Cortex Neurofibrillary Tangles | 10 | Hippocampus Neurofibrillary Tangles       | 17 | 0.44  |
| Insular Cortex Neurofibrillary Tangles | 10 | Nucleus Basalis Neurofibrillary Tangles   | 20 | 0.42  |
| Insular Cortex Neurofibrillary Tangles | 10 | Anterior Corticospinal Tract Degeneration | 33 | 0.41  |
| Insular Cortex Neurofibrillary Tangles | 10 | AD in Final Diagnosis                     | 10 | 0.40  |
| Insular Cortex Neurofibrillary Tangles | 10 | Lewy Body Formation                       | 5  | 0.37  |
| Insular Cortex Neurofibrillary Tangles | 10 | Lateral Corticospinal Tract Degeneration  | 41 | 0.36  |
| Insular Cortex Neurofibrillary Tangles | 10 | Ventral Nerve Roots Atrophy               | 30 | 0.36  |
| Insular Cortex Neurofibrillary Tangles | 10 | Betz Cell Loss                            | 35 | 0.32  |
| Insular Cortex Neurofibrillary Tangles | 10 | Substantia Nigra Neurofibrillary Tangles  | 6  | 0.29  |

|                                        |    |                                          |    |       |
|----------------------------------------|----|------------------------------------------|----|-------|
| Insular Cortex Neurofibrillary Tangles | 10 | Age of Death                             | 46 | 0.28  |
| Insular Cortex Neurofibrillary Tangles | 10 | Onset Age                                | 46 | 0.27  |
| Insular Cortex Neurofibrillary Tangles | 10 | Diagnosis Age                            | 46 | 0.26  |
| Insular Cortex Neurofibrillary Tangles | 10 | Locus Ceruleus Neurofibrillary Tangles   | 14 | 0.24  |
| Insular Cortex Neurofibrillary Tangles | 10 | Loss Purkinje Cells                      | 39 | 0.20  |
| Insular Cortex Neurofibrillary Tangles | 10 | FTLD in Final Diagnosis                  | 12 | 0.20  |
| Insular Cortex Neurofibrillary Tangles | 10 | Lewy Body Disease in Final Diagnosis     | 2  | 0.19  |
| Insular Cortex Neurofibrillary Tangles | 10 | Loss of Neurons Locus Ceruleus           | 6  | -0.17 |
| Insular Cortex Neurofibrillary Tangles | 10 | Loss of Neurons Amygdala                 | 2  | 0.17  |
| Insular Cortex Neurofibrillary Tangles | 10 | Locus Ceruleus Pigmentary Incontinence   | 35 | 0.14  |
| Insular Cortex Neurofibrillary Tangles | 10 | Brain Mass                               | 46 | -0.14 |
| Insular Cortex Neurofibrillary Tangles | 10 | Loss of Neurons Dentate Nucleus          | 8  | 0.12  |
| Insular Cortex Neurofibrillary Tangles | 10 | FTD in Final Diagnosis                   | 3  | -0.12 |
| Insular Cortex Neurofibrillary Tangles | 10 | Microinfarcts                            | 3  | -0.12 |
| Insular Cortex Neurofibrillary Tangles | 10 | Substantia Nigra Pigmentary Incontinence | 32 | -0.12 |
| Insular Cortex Neurofibrillary Tangles | 10 | Frontal Cortex Neurofibrillary Tangles   | 6  | 0.11  |
| Insular Cortex Neurofibrillary Tangles | 10 | Diagnostic Delay                         | 46 | -0.10 |
| Insular Cortex Neurofibrillary Tangles | 10 | Disease Duration                         | 46 | -0.10 |
| Insular Cortex Neurofibrillary Tangles | 10 | Denervation                              | 31 | 0.09  |
| Insular Cortex Neurofibrillary Tangles | 10 | Loss of Neurons Substantia Nigra         | 6  | -0.07 |
| Insular Cortex Neurofibrillary Tangles | 10 | Paraspinal Muscle Fiber Atrophy          | 26 | 0.07  |
| Insular Cortex Neurofibrillary Tangles | 10 | Familial ALS                             | 1  | -0.07 |
| Insular Cortex Neurofibrillary Tangles | 10 | Infarcts                                 | 1  | -0.07 |
| Insular Cortex Neurofibrillary Tangles | 10 | Parietal Cortex Neurofibrillary Tangles  | 1  | -0.07 |

|                                          |    |                                        |    |       |
|------------------------------------------|----|----------------------------------------|----|-------|
| Insular Cortex Neurofibrillary Tangles   | 10 | Loss of Neurons Gyrus                  | 1  | -0.07 |
| Insular Cortex Neurofibrillary Tangles   | 10 | Diaphragm Atrophy                      | 25 | 0.04  |
| Insular Cortex Neurofibrillary Tangles   | 10 | Loss of Neurons Anterior Horns         | 20 | -0.03 |
| Insular Cortex Neurofibrillary Tangles   | 10 | Tau Pathology/Tauopathy                | 8  | -0.03 |
| Insular Cortex Neurofibrillary Tangles   | 10 | Gender (1 = m, 2 = f)                  | 46 | -0.03 |
| Insular Cortex Neurofibrillary Tangles   | 10 | Loss of Neurons Spinal Cord            | 11 | 0.02  |
| Insular Cortex Neurofibrillary Tangles   | 10 | Loss of Neurons Medulla                | 15 | -0.01 |
| Lateral Corticospinal Tract Degeneration | 41 | Betz Cell Loss                         | 35 | 0.37  |
| Lateral Corticospinal Tract Degeneration | 41 | AD in Final Diagnosis                  | 10 | 0.29  |
| Lateral Corticospinal Tract Degeneration | 41 | FTD in Final Diagnosis                 | 3  | -0.27 |
| Lateral Corticospinal Tract Degeneration | 41 | FTLD in Final Diagnosis                | 12 | -0.27 |
| Lateral Corticospinal Tract Degeneration | 41 | Familial ALS                           | 1  | -0.26 |
| Lateral Corticospinal Tract Degeneration | 41 | Ventral Nerve Roots Atrophy            | 30 | 0.26  |
| Lateral Corticospinal Tract Degeneration | 41 | Lewy Body Formation                    | 5  | 0.26  |
| Lateral Corticospinal Tract Degeneration | 41 | Loss of Neurons Substantia Nigra       | 6  | 0.23  |
| Lateral Corticospinal Tract Degeneration | 41 | Tau Pathology/Tauopathy                | 8  | 0.19  |
| Lateral Corticospinal Tract Degeneration | 41 | Locus Ceruleus Pigmentary Incontinence | 35 | 0.19  |
| Lateral Corticospinal Tract Degeneration | 41 | Loss of Neurons Locus Ceruleus         | 6  | 0.18  |
| Lateral Corticospinal Tract Degeneration | 41 | Lewy Body Disease in Final Diagnosis   | 2  | 0.16  |
| Lateral Corticospinal Tract Degeneration | 41 | Diagnostic Delay                       | 46 | -0.16 |
| Lateral Corticospinal Tract Degeneration | 41 | Paraspinal Muscle Fiber Atrophy        | 26 | 0.15  |
| Lateral Corticospinal Tract Degeneration | 41 | Loss Purkinje Cells                    | 39 | 0.14  |
| Lateral Corticospinal Tract Degeneration | 41 | Brain Mass                             | 46 | -0.14 |
| Lateral Corticospinal Tract Degeneration | 41 | Disease Duration                       | 46 | 0.13  |

|                                          |    |                                          |    |       |
|------------------------------------------|----|------------------------------------------|----|-------|
| Lateral Corticospinal Tract Degeneration | 41 | Loss of Neurons Anterior Horns           | 20 | -0.13 |
| Lateral Corticospinal Tract Degeneration | 41 | Denervation                              | 31 | 0.10  |
| Lateral Corticospinal Tract Degeneration | 41 | Diagnosis Age                            | 46 | -0.10 |
| Lateral Corticospinal Tract Degeneration | 41 | Loss of Neurons Spinal Cord              | 11 | -0.09 |
| Lateral Corticospinal Tract Degeneration | 41 | Onset Age                                | 46 | -0.08 |
| Lateral Corticospinal Tract Degeneration | 41 | Loss of Neurons Dentate Nucleus          | 8  | 0.07  |
| Lateral Corticospinal Tract Degeneration | 41 | Age of Death                             | 46 | -0.05 |
| Lateral Corticospinal Tract Degeneration | 41 | Substantia Nigra Pigmentary Incontinence | 32 | 0.04  |
| Lateral Corticospinal Tract Degeneration | 41 | Gender (1 = m, 2 = f)                    | 46 | -0.03 |
| Lateral Corticospinal Tract Degeneration | 41 | Microinfarcts                            | 3  | -0.02 |
| Lateral Corticospinal Tract Degeneration | 41 | Loss of Neurons Amygdala                 | 2  | -0.02 |
| Lateral Corticospinal Tract Degeneration | 41 | Loss of Neurons Medulla                  | 15 | 0.01  |
| Lateral Corticospinal Tract Degeneration | 41 | Infarcts                                 | 1  | -0.01 |
| Lateral Corticospinal Tract Degeneration | 41 | Loss of Neurons Gyrus                    | 1  | -0.01 |
| Lateral Corticospinal Tract Degeneration | 41 | Diaphragm Atrophy                        | 25 | 0.00  |
| Lewy Body Disease in Final Diagnosis     | 2  | Brain Mass                               | 46 | 0.20  |
| Lewy Body Disease in Final Diagnosis     | 2  | Gender (1 = m, 2 = f)                    | 46 | -0.16 |
| Lewy Body Disease in Final Diagnosis     | 2  | Disease Duration                         | 46 | -0.13 |
| Lewy Body Disease in Final Diagnosis     | 2  | FTLD in Final Diagnosis                  | 12 | -0.13 |
| Lewy Body Disease in Final Diagnosis     | 2  | Onset Age                                | 46 | 0.12  |
| Lewy Body Disease in Final Diagnosis     | 2  | AD in Final Diagnosis                    | 10 | -0.11 |
| Lewy Body Disease in Final Diagnosis     | 2  | Diagnosis Age                            | 46 | 0.11  |
| Lewy Body Disease in Final Diagnosis     | 2  | Diagnostic Delay                         | 46 | -0.11 |
| Lewy Body Disease in Final Diagnosis     | 2  | Age of Death                             | 46 | 0.10  |

|                                      |    |                                          |    |       |
|--------------------------------------|----|------------------------------------------|----|-------|
| Lewy Body Disease in Final Diagnosis | 2  | FTD in Final Diagnosis                   | 3  | -0.06 |
| Lewy Body Formation                  | 5  | Lewy Body Disease in Final Diagnosis     | 2  | 0.74  |
| Lewy Body Formation                  | 5  | Loss of Neurons Substantia Nigra         | 6  | 0.26  |
| Lewy Body Formation                  | 5  | Loss of Neurons Anterior Horns           | 20 | -0.26 |
| Lewy Body Formation                  | 5  | Gender (1 = m, 2 = f)                    | 46 | -0.25 |
| Lewy Body Formation                  | 5  | Loss of Neurons Locus Ceruleus           | 6  | 0.21  |
| Lewy Body Formation                  | 5  | Diagnosis Age                            | 46 | 0.17  |
| Lewy Body Formation                  | 5  | Onset Age                                | 46 | 0.16  |
| Lewy Body Formation                  | 5  | Age of Death                             | 46 | 0.16  |
| Lewy Body Formation                  | 5  | Loss of Neurons Dentate Nucleus          | 8  | -0.15 |
| Lewy Body Formation                  | 5  | Disease Duration                         | 46 | -0.12 |
| Lewy Body Formation                  | 5  | Brain Mass                               | 46 | 0.10  |
| Lewy Body Formation                  | 5  | Microinfarcts                            | 3  | -0.09 |
| Lewy Body Formation                  | 5  | Loss of Neurons Medulla                  | 15 | -0.08 |
| Lewy Body Formation                  | 5  | FTD in Final Diagnosis                   | 3  | 0.08  |
| Lewy Body Formation                  | 5  | Loss Purkinje Cells                      | 39 | -0.07 |
| Lewy Body Formation                  | 5  | Loss of Neurons Amygdala                 | 2  | -0.07 |
| Lewy Body Formation                  | 5  | Diaphragm Atrophy                        | 25 | -0.07 |
| Lewy Body Formation                  | 5  | Tau Pathology/Tauopathy                  | 8  | 0.07  |
| Lewy Body Formation                  | 5  | Loss of Neurons Spinal Cord              | 11 | -0.05 |
| Lewy Body Formation                  | 5  | Familial ALS                             | 1  | -0.05 |
| Lewy Body Formation                  | 5  | Infarcts                                 | 1  | -0.05 |
| Lewy Body Formation                  | 5  | Loss of Neurons Gyrus                    | 1  | -0.05 |
| Lewy Body Formation                  | 5  | Denervation                              | 31 | 0.05  |
| Lewy Body Formation                  | 5  | AD in Final Diagnosis                    | 10 | 0.03  |
| Lewy Body Formation                  | 5  | Paraspinal Muscle Fiber Atrophy          | 26 | -0.02 |
| Lewy Body Formation                  | 5  | FTLD in Final Diagnosis                  | 12 | -0.01 |
| Lewy Body Formation                  | 5  | Diagnostic Delay                         | 46 | 0.01  |
| Lewy Body Formation                  | 5  | Ventral Nerve Roots Atrophy              | 30 | 0.00  |
| Limb                                 | 30 | Cingulate Cortex Neurofibrillary Tangles | 2  | -0.35 |
| Limb                                 | 30 | Substantia Nigra Pigmentary Incontinence | 32 | -0.28 |
| Limb                                 | 30 | FTLD in Final Diagnosis                  | 12 | -0.26 |
| Limb                                 | 30 | Loss of Neurons Substantia Nigra         | 6  | -0.25 |
| Limb                                 | 30 | Nucleus Basalis Neurofibrillary Tangles  | 20 | -0.25 |
| Limb                                 | 30 | Age of Death                             | 46 | -0.23 |
| Limb                                 | 30 | Onset Age                                | 46 | -0.21 |
| Limb                                 | 30 | Diaphragm Atrophy                        | 25 | 0.21  |
| Limb                                 | 30 | Diagnosis Age                            | 46 | -0.20 |
| Limb                                 | 30 | Frontal Cortex Neurofibrillary Tangles   | 6  | 0.19  |
| Limb                                 | 30 | Loss of Neurons Locus Ceruleus           | 6  | -0.18 |
| Limb                                 | 30 | Ventricular Dilation                     | 6  | -0.17 |
| Limb                                 | 30 | Atherosclerosis                          | 16 | -0.17 |



|      |    |                                                       |    |       |
|------|----|-------------------------------------------------------|----|-------|
| Limb | 30 | NFT (any location)                                    | 36 | -0.16 |
| Limb | 30 | Entorhinal Cortex Neurofibrillary Tangles             | 28 | -0.15 |
| Limb | 30 | General Spinal Cord Atrophy                           | 4  | -0.15 |
| Limb | 30 | Basal Ganglia Neurofibrillary Tangles                 | 1  | -0.15 |
| Limb | 30 | Caudate Nucleus Neurofibrillary Tangles               | 1  | -0.15 |
| Limb | 30 | Infarcts                                              | 1  | -0.15 |
| Limb | 30 | Putamen Neurofibrillary Tangles                       | 1  | -0.15 |
| Limb | 30 | Loss Purkinje Cells                                   | 39 | -0.15 |
| Limb | 30 | Brain Mass                                            | 46 | 0.14  |
| Limb | 30 | Anterior Horn Cells Neurofibrillary Tangles           | 2  | 0.14  |
| Limb | 30 | Hippocampus Neurofibrillary Tangles                   | 17 | -0.14 |
| Limb | 30 | Brain Atrophy                                         | 9  | -0.14 |
| Limb | 30 | Insular Cortex Neurofibrillary Tangles                | 10 | -0.13 |
| Limb | 30 | Substantia Nigra Neurofibrillary Tangles              | 6  | -0.12 |
| Limb | 30 | Brain Neuron Loss                                     | 38 | -0.12 |
| Limb | 30 | Lewy Body Disease in Final Diagnosis                  | 2  | -0.12 |
| Limb | 30 | Loss of Neurons Dentate Nucleus                       | 8  | -0.12 |
| Limb | 30 | FTD in Final Diagnosis                                | 3  | -0.11 |
| Limb | 30 | Microinfarcts                                         | 3  | -0.11 |
| Limb | 30 | Familial ALS                                          | 1  | 0.11  |
| Limb | 30 | Occipital Cortex Neurofibrillary Tangles              | 1  | 0.11  |
| Limb | 30 | Dentate Nucleus of Cerebellum Neurofibrillary Tangles | 1  | 0.11  |
| Limb | 30 | Loss of Neurons Gyrus                                 | 1  | 0.11  |
| Limb | 30 | Parietal Cortex Neurofibrillary Tangles               | 1  | 0.11  |
| Limb | 30 | TDP-43                                                | 37 | -0.10 |
| Limb | 30 | Locus Ceruleus Pigmentary Incontinence                | 35 | 0.10  |
| Limb | 30 | Diagnostic Delay                                      | 46 | 0.10  |
| Limb | 30 | Locus Ceruleus Neurofibrillary Tangles                | 14 | -0.10 |
| Limb | 30 | Thalamus Neurofibrillary Tangles                      | 7  | -0.09 |
| Limb | 30 | Hypothalamus Neurofibrillary Tangles                  | 10 | -0.08 |
| Limb | 30 | Tau Pathology/Tauopathy                               | 8  | 0.08  |
| Limb | 30 | Gender (1 = m, 2 = f)                                 | 46 | 0.08  |
| Limb | 30 | Loss of Neurons Amygdala                              | 2  | -0.07 |
| Limb | 30 | Denervation                                           | 31 | 0.06  |
| Limb | 30 | Loss of Neurons Spinal Cord                           | 11 | 0.05  |
| Limb | 30 | Loss of Neurons Medulla                               | 15 | -0.05 |

|                                        |    |                                           |    |       |
|----------------------------------------|----|-------------------------------------------|----|-------|
| Limb                                   | 30 | Neocortex Neurofibrillary Tangles         | 2  | -0.05 |
| Limb                                   | 30 | Anterior Corticospinal Tract Degeneration | 33 | -0.04 |
| Limb                                   | 30 | Lateral Corticospinal Tract Degeneration  | 41 | 0.04  |
| Limb                                   | 30 | Amygdala Neurofibrillary Tangles          | 20 | -0.04 |
| Limb                                   | 30 | Temporal Cortex Neurofibrillary Tangles   | 7  | -0.04 |
| Limb                                   | 30 | Ventral Root Atrophy                      | 30 | 0.04  |
| Limb                                   | 30 | Loss of Neurons Anterior Horns            | 20 | 0.03  |
| Limb                                   | 30 | AD in Final Diagnosis                     | 10 | -0.03 |
| Limb                                   | 30 | Paraspinal Muscle Fiber Atrophy           | 26 | 0.03  |
| Limb                                   | 30 | Disease Duration                          | 46 | 0.02  |
| Limb                                   | 30 | Ventral Nerve Roots Atrophy               | 30 | 0.02  |
| Limb                                   | 30 | Lewy Body Formation                       | 5  | 0.02  |
| Limb                                   | 30 | Betz Cell Loss                            | 35 | -0.01 |
| Locus Ceruleus Neurofibrillary Tangles | 14 | Nucleus Basalis Neurofibrillary Tangles   | 20 | 0.61  |
| Locus Ceruleus Neurofibrillary Tangles | 14 | Amygdala Neurofibrillary Tangles          | 20 | 0.45  |
| Locus Ceruleus Neurofibrillary Tangles | 14 | Entorhinal Cortex Neurofibrillary Tangles | 28 | 0.42  |
| Locus Ceruleus Neurofibrillary Tangles | 14 | Substantia Nigra Neurofibrillary Tangles  | 6  | 0.40  |
| Locus Ceruleus Neurofibrillary Tangles | 14 | Familial ALS                              | 1  | 0.27  |
| Locus Ceruleus Neurofibrillary Tangles | 14 | Diaphragm Atrophy                         | 25 | 0.25  |
| Locus Ceruleus Neurofibrillary Tangles | 14 | Loss of Neurons Dentate Nucleus           | 8  | 0.24  |
| Locus Ceruleus Neurofibrillary Tangles | 14 | Denervation                               | 31 | 0.22  |
| Locus Ceruleus Neurofibrillary Tangles | 14 | Brain Mass                                | 46 | 0.22  |
| Locus Ceruleus Neurofibrillary Tangles | 14 | Tau Pathology/Tauopathy                   | 8  | 0.21  |
| Locus Ceruleus Neurofibrillary Tangles | 14 | Paraspinal Muscle Fiber Atrophy           | 26 | 0.19  |
| Locus Ceruleus Neurofibrillary Tangles | 14 | Anterior Corticospinal Tract Degeneration | 33 | -0.18 |
| Locus Ceruleus Neurofibrillary Tangles | 14 | Lateral Corticospinal Tract Degeneration  | 41 | -0.17 |
| Locus Ceruleus Neurofibrillary Tangles | 14 | Loss of Neurons Locus Ceruleus            | 6  | -0.17 |
| Locus Ceruleus Neurofibrillary Tangles | 14 | Microinfarcts                             | 3  | -0.16 |
| Locus Ceruleus Neurofibrillary Tangles | 14 | Loss of Neurons Substantia Nigra          | 6  | -0.14 |

|                                        |    |                                          |    |       |
|----------------------------------------|----|------------------------------------------|----|-------|
| Locus Ceruleus Neurofibrillary Tangles | 14 | Lewy Body Disease in Final Diagnosis     | 2  | 0.13  |
| Locus Ceruleus Neurofibrillary Tangles | 14 | FTD in Final Diagnosis                   | 3  | 0.12  |
| Locus Ceruleus Neurofibrillary Tangles | 14 | Loss of Neurons Spinal Cord              | 11 | 0.11  |
| Locus Ceruleus Neurofibrillary Tangles | 14 | Loss of Neurons Medulla                  | 15 | -0.10 |
| Locus Ceruleus Neurofibrillary Tangles | 14 | Loss of Neurons Gyrus                    | 1  | -0.09 |
| Locus Ceruleus Neurofibrillary Tangles | 14 | Infarcts                                 | 1  | -0.09 |
| Locus Ceruleus Neurofibrillary Tangles | 14 | Age of Death                             | 46 | -0.08 |
| Locus Ceruleus Neurofibrillary Tangles | 14 | Hippocampus Neurofibrillary Tangles      | 17 | 0.08  |
| Locus Ceruleus Neurofibrillary Tangles | 14 | Onset Age                                | 46 | -0.07 |
| Locus Ceruleus Neurofibrillary Tangles | 14 | Diagnosis Age                            | 46 | -0.07 |
| Locus Ceruleus Neurofibrillary Tangles | 14 | Loss Purkinje Cells                      | 39 | 0.06  |
| Locus Ceruleus Neurofibrillary Tangles | 14 | Gender (1 = m, 2 = f)                    | 46 | -0.06 |
| Locus Ceruleus Neurofibrillary Tangles | 14 | Diagnostic Delay                         | 46 | 0.05  |
| Locus Ceruleus Neurofibrillary Tangles | 14 | Locus Ceruleus Pigmentary Incontinence   | 35 | 0.04  |
| Locus Ceruleus Neurofibrillary Tangles | 14 | Ventral Nerve Roots Atrophy              | 30 | -0.04 |
| Locus Ceruleus Neurofibrillary Tangles | 14 | Betz Cell Loss                           | 35 | 0.03  |
| Locus Ceruleus Neurofibrillary Tangles | 14 | AD in Final Diagnosis                    | 10 | 0.02  |
| Locus Ceruleus Neurofibrillary Tangles | 14 | FTLD in Final Diagnosis                  | 12 | 0.02  |
| Locus Ceruleus Neurofibrillary Tangles | 14 | Substantia Nigra Pigmentary Incontinence | 32 | -0.01 |
| Locus Ceruleus Neurofibrillary Tangles | 14 | Loss of Neurons Amygdala                 | 2  | 0.01  |
| Locus Ceruleus Neurofibrillary Tangles | 14 | Disease Duration                         | 46 | -0.01 |
| Locus Ceruleus Neurofibrillary Tangles | 14 | Loss of Neurons Anterior Horns           | 20 | 0.00  |
| Locus Ceruleus Neurofibrillary Tangles | 14 | Lewy Body Formation                      | 5  | 0.00  |
| Locus Ceruleus Pigmentary Incontinence | 35 | Loss Purkinje Cells                      | 39 | 0.42  |

|                                        |    |                                          |    |       |
|----------------------------------------|----|------------------------------------------|----|-------|
| Locus Ceruleus Pigmentary Incontinence | 35 | Loss of Neurons Spinal Cord              | 11 | 0.41  |
| Locus Ceruleus Pigmentary Incontinence | 35 | Loss of Neurons Amygdala                 | 2  | 0.39  |
| Locus Ceruleus Pigmentary Incontinence | 35 | Ventral Nerve Roots Atrophy              | 30 | 0.34  |
| Locus Ceruleus Pigmentary Incontinence | 35 | Tau Pathology/Tauopathy                  | 8  | 0.24  |
| Locus Ceruleus Pigmentary Incontinence | 35 | AD in Final Diagnosis                    | 10 | 0.23  |
| Locus Ceruleus Pigmentary Incontinence | 35 | Diaphragm Atrophy                        | 25 | 0.23  |
| Locus Ceruleus Pigmentary Incontinence | 35 | Paraspinal Muscle Fiber Atrophy          | 26 | 0.22  |
| Locus Ceruleus Pigmentary Incontinence | 35 | Substantia Nigra Pigmentary Incontinence | 32 | 0.22  |
| Locus Ceruleus Pigmentary Incontinence | 35 | FTD in Final Diagnosis                   | 3  | -0.21 |
| Locus Ceruleus Pigmentary Incontinence | 35 | Loss of Neurons Dentate Nucleus          | 8  | 0.18  |
| Locus Ceruleus Pigmentary Incontinence | 35 | Denervation                              | 31 | 0.17  |
| Locus Ceruleus Pigmentary Incontinence | 35 | Betz Cell Loss                           | 35 | 0.14  |
| Locus Ceruleus Pigmentary Incontinence | 35 | Brain Mass                               | 46 | 0.10  |
| Locus Ceruleus Pigmentary Incontinence | 35 | Loss of Neurons Locus Ceruleus           | 6  | 0.09  |
| Locus Ceruleus Pigmentary Incontinence | 35 | Age of Death                             | 46 | 0.09  |
| Locus Ceruleus Pigmentary Incontinence | 35 | Disease Duration                         | 46 | 0.08  |
| Locus Ceruleus Pigmentary Incontinence | 35 | Loss of Neurons Medulla                  | 15 | 0.08  |
| Locus Ceruleus Pigmentary Incontinence | 35 | Lewy Body Formation                      | 5  | -0.07 |
| Locus Ceruleus Pigmentary Incontinence | 35 | Onset Age                                | 46 | 0.06  |
| Locus Ceruleus Pigmentary Incontinence | 35 | Diagnosis Age                            | 46 | 0.05  |
| Locus Ceruleus Pigmentary Incontinence | 35 | Diagnostic Delay                         | 46 | -0.05 |
| Locus Ceruleus Pigmentary Incontinence | 35 | Microinfarcts                            | 3  | 0.04  |
| Locus Ceruleus Pigmentary Incontinence | 35 | Loss of Neurons Anterior Horns           | 20 | -0.04 |
| Locus Ceruleus Pigmentary Incontinence | 35 | Lewy Body Disease in Final Diagnosis     | 2  | 0.03  |

|                                        |    |                                      |    |       |
|----------------------------------------|----|--------------------------------------|----|-------|
| Locus Ceruleus Pigmentary Incontinence | 35 | Familial ALS                         | 1  | 0.02  |
| Locus Ceruleus Pigmentary Incontinence | 35 | Loss of Neurons Gyrus                | 1  | 0.02  |
| Locus Ceruleus Pigmentary Incontinence | 35 | Infarcts                             | 1  | 0.02  |
| Locus Ceruleus Pigmentary Incontinence | 35 | FTLD in Final Diagnosis              | 12 | 0.02  |
| Locus Ceruleus Pigmentary Incontinence | 35 | Loss of Neurons Substantia Nigra     | 6  | -0.01 |
| Locus Ceruleus Pigmentary Incontinence | 35 | Gender (1 = m, 2 = f)                | 46 | -0.01 |
| Loss of Neurons Amygdala               | 2  | Tau Pathology/Tauopathy              | 8  | 0.23  |
| Loss of Neurons Amygdala               | 2  | Loss of Neurons Dentate Nucleus      | 8  | 0.14  |
| Loss of Neurons Amygdala               | 2  | Loss of Neurons Medulla              | 15 | -0.14 |
| Loss of Neurons Amygdala               | 2  | Loss of Neurons Spinal Cord          | 11 | 0.11  |
| Loss of Neurons Amygdala               | 2  | AD in Final Diagnosis                | 10 | -0.11 |
| Loss of Neurons Amygdala               | 2  | Disease Duration                     | 46 | -0.09 |
| Loss of Neurons Amygdala               | 2  | Loss of Neurons Substantia Nigra     | 6  | -0.08 |
| Loss of Neurons Amygdala               | 2  | Diagnostic Delay                     | 46 | -0.08 |
| Loss of Neurons Amygdala               | 2  | Loss of Neurons Locus Ceruleus       | 6  | -0.08 |
| Loss of Neurons Amygdala               | 2  | FTLD in Final Diagnosis              | 12 | 0.07  |
| Loss of Neurons Amygdala               | 2  | FTD in Final Diagnosis               | 3  | -0.06 |
| Loss of Neurons Amygdala               | 2  | Microinfarcts                        | 3  | -0.06 |
| Loss of Neurons Amygdala               | 2  | Lewy Body Disease in Final Diagnosis | 2  | -0.04 |
| Loss of Neurons Amygdala               | 2  | Brain Mass                           | 46 | 0.04  |
| Loss of Neurons Amygdala               | 2  | Onset Age                            | 46 | 0.03  |
| Loss of Neurons Amygdala               | 2  | Familial ALS                         | 1  | -0.03 |
| Loss of Neurons Amygdala               | 2  | Infarcts                             | 1  | -0.03 |
| Loss of Neurons Amygdala               | 2  | Diagnosis Age                        | 46 | 0.02  |
| Loss of Neurons Amygdala               | 2  | Gender (1 = m, 2 = f)                | 46 | 0.01  |
| Loss of Neurons Amygdala               | 2  | Age of Death                         | 46 | 0.01  |

|                                 |    |                                      |    |       |
|---------------------------------|----|--------------------------------------|----|-------|
| Amygdala                        |    |                                      |    |       |
| Loss of Neurons Amygdala        | 2  | Loss of Neurons Anterior Horns       | 20 | 0.00  |
| Loss of Neurons Anterior Horns  | 20 | Brain Mass                           | 46 | -0.30 |
| Loss of Neurons Anterior Horns  | 20 | Age of Death                         | 46 | 0.30  |
| Loss of Neurons Anterior Horns  | 20 | Onset Age                            | 46 | 0.30  |
| Loss of Neurons Anterior Horns  | 20 | Diagnosis Age                        | 46 | 0.29  |
| Loss of Neurons Anterior Horns  | 20 | Infarcts                             | 1  | 0.19  |
| Loss of Neurons Anterior Horns  | 20 | Familial ALS                         | 1  | 0.19  |
| Loss of Neurons Anterior Horns  | 20 | Lewy Body Disease in Final Diagnosis | 2  | -0.18 |
| Loss of Neurons Anterior Horns  | 20 | Microinfarcts                        | 3  | 0.16  |
| Loss of Neurons Anterior Horns  | 20 | Loss of Neurons Substantia Nigra     | 6  | -0.15 |
| Loss of Neurons Anterior Horns  | 20 | Disease Duration                     | 46 | -0.14 |
| Loss of Neurons Anterior Horns  | 20 | FTLD in Final Diagnosis              | 12 | 0.14  |
| Loss of Neurons Anterior Horns  | 20 | Gender (1 = m, 2 = f)                | 46 | 0.13  |
| Loss of Neurons Anterior Horns  | 20 | AD in Final Diagnosis                | 10 | -0.10 |
| Loss of Neurons Anterior Horns  | 20 | Diagnostic Delay                     | 46 | -0.09 |
| Loss of Neurons Anterior Horns  | 20 | FTD in Final Diagnosis               | 3  | -0.08 |
| Loss of Neurons Anterior Horns  | 20 | Tau Pathology/Tauopathy              | 8  | -0.02 |
| Loss of Neurons Anterior Horns  | 20 | Loss of Neurons Medulla              | 15 | 0.00  |
| Loss of Neurons Dentate Nucleus | 8  | Diagnosis Age                        | 46 | -0.36 |
| Loss of Neurons Dentate Nucleus | 8  | Onset Age                            | 46 | -0.35 |
| Loss of Neurons Dentate Nucleus | 8  | Loss of Neurons Medulla              | 15 | 0.34  |
| Loss of Neurons Dentate Nucleus | 8  | Age of Death                         | 46 | -0.32 |
| Loss of Neurons Dentate Nucleus | 8  | Disease Duration                     | 46 | 0.30  |

|                                 |   |                                      |    |       |
|---------------------------------|---|--------------------------------------|----|-------|
| Loss of Neurons Dentate Nucleus | 8 | Loss of Neurons Locus Ceruleus       | 6  | 0.24  |
| Loss of Neurons Dentate Nucleus | 8 | Tau Pathology/Tauopathy              | 8  | -0.20 |
| Loss of Neurons Dentate Nucleus | 8 | Gender (1 = m, 2 = f)                | 46 | 0.16  |
| Loss of Neurons Dentate Nucleus | 8 | Brain Mass                           | 46 | 0.14  |
| Loss of Neurons Dentate Nucleus | 8 | FTD in Final Diagnosis               | 3  | -0.12 |
| Loss of Neurons Dentate Nucleus | 8 | Microinfarcts                        | 3  | -0.12 |
| Loss of Neurons Dentate Nucleus | 8 | FTLD in Final Diagnosis              | 12 | 0.10  |
| Loss of Neurons Dentate Nucleus | 8 | Lewy Body Disease in Final Diagnosis | 2  | -0.09 |
| Loss of Neurons Dentate Nucleus | 8 | Loss of Neurons Anterior Horns       | 20 | -0.08 |
| Loss of Neurons Dentate Nucleus | 8 | Loss of Neurons Substantia Nigra     | 6  | 0.07  |
| Loss of Neurons Dentate Nucleus | 8 | Familial ALS                         | 1  | -0.07 |
| Loss of Neurons Dentate Nucleus | 8 | Infarcts                             | 1  | -0.07 |
| Loss of Neurons Dentate Nucleus | 8 | AD in Final Diagnosis                | 10 | -0.04 |
| Loss of Neurons Dentate Nucleus | 8 | Diagnostic Delay                     | 46 | -0.03 |
| Loss of Neurons Gyrus           | 1 | Loss of Neurons Locus Ceruleus       | 6  | 0.24  |
| Loss of Neurons Gyrus           | 1 | Gender (1 = m, 2 = f)                | 46 | 0.19  |
| Loss of Neurons Gyrus           | 1 | Loss of Neurons Anterior Horns       | 20 | 0.11  |
| Loss of Neurons Gyrus           | 1 | Loss of Neurons Medulla              | 15 | -0.10 |
| Loss of Neurons Gyrus           | 1 | FTLD in Final Diagnosis              | 12 | -0.09 |
| Loss of Neurons Gyrus           | 1 | Disease Duration                     | 46 | -0.08 |
| Loss of Neurons Gyrus           | 1 | AD in Final Diagnosis                | 10 | -0.08 |
| Loss of Neurons Gyrus           | 1 | Loss of Neurons Spinal Cord          | 11 | -0.08 |
| Loss of Neurons Gyrus           | 1 | Tau Pathology/Tauopathy              | 8  | -0.07 |
| Loss of Neurons Gyrus           | 1 | Loss of Neurons Dentate Nucleus      | 8  | -0.07 |
| Loss of Neurons Gyrus           | 1 | Loss of Neurons Substantia Nigra     | 6  | -0.06 |
| Loss of Neurons Gyrus           | 1 | Diagnostic Delay                     | 46 | -0.05 |
| Loss of Neurons Gyrus           | 1 | Brain Mass                           | 46 | -0.05 |
| Loss of Neurons Gyrus           | 1 | Onset Age                            | 46 | 0.05  |
| Loss of Neurons Gyrus           | 1 | Diagnosis Age                        | 46 | 0.05  |
| Loss of Neurons Gyrus           | 1 | FTD in Final Diagnosis               | 3  | -0.04 |
| Loss of Neurons Gyrus           | 1 | Microinfarcts                        | 3  | -0.04 |
| Loss of Neurons Gyrus           | 1 | Age of Death                         | 46 | 0.04  |
| Loss of Neurons Gyrus           | 1 | Lewy Body Disease in Final Diagnosis | 2  | -0.03 |

|                                |    |                                      |    |       |
|--------------------------------|----|--------------------------------------|----|-------|
| Loss of Neurons Gyrus          | 1  | Loss of Neurons Amygdala             | 2  | -0.03 |
| Loss of Neurons Gyrus          | 1  | Familial ALS                         | 1  | -0.02 |
| Loss of Neurons Gyrus          | 1  | Infarcts                             | 1  | -0.02 |
| Loss of Neurons Locus Ceruleus | 6  | Lewy Body Disease in Final Diagnosis | 2  | 0.34  |
| Loss of Neurons Locus Ceruleus | 6  | Loss of Neurons Substantia Nigra     | 6  | 0.26  |
| Loss of Neurons Locus Ceruleus | 6  | FTLD in Final Diagnosis              | 12 | -0.22 |
| Loss of Neurons Locus Ceruleus | 6  | Diagnostic Delay                     | 46 | -0.20 |
| Loss of Neurons Locus Ceruleus | 6  | Diagnosis Age                        | 46 | -0.19 |
| Loss of Neurons Locus Ceruleus | 6  | Onset Age                            | 46 | -0.16 |
| Loss of Neurons Locus Ceruleus | 6  | Age of Death                         | 46 | -0.15 |
| Loss of Neurons Locus Ceruleus | 6  | Loss of Neurons Anterior Horns       | 20 | -0.12 |
| Loss of Neurons Locus Ceruleus | 6  | Disease Duration                     | 46 | 0.12  |
| Loss of Neurons Locus Ceruleus | 6  | FTD in Final Diagnosis               | 3  | -0.10 |
| Loss of Neurons Locus Ceruleus | 6  | Microinfarcts                        | 3  | -0.10 |
| Loss of Neurons Locus Ceruleus | 6  | Brain Mass                           | 46 | 0.08  |
| Loss of Neurons Locus Ceruleus | 6  | Infarcts                             | 1  | -0.05 |
| Loss of Neurons Locus Ceruleus | 6  | Familial ALS                         | 1  | -0.05 |
| Loss of Neurons Locus Ceruleus | 6  | Tau Pathology/Tauopathy              | 8  | -0.05 |
| Loss of Neurons Locus Ceruleus | 6  | Loss of Neurons Medulla              | 15 | 0.04  |
| Loss of Neurons Locus Ceruleus | 6  | Gender (1 = m, 2 = f)                | 46 | 0.03  |
| Loss of Neurons Locus Ceruleus | 6  | AD in Final Diagnosis                | 10 | 0.02  |
| Loss of Neurons Medulla        | 15 | FTLD in Final Diagnosis              | 12 | 0.22  |
| Loss of Neurons Medulla        | 15 | FTD in Final Diagnosis               | 3  | -0.18 |
| Loss of Neurons Medulla        | 15 | Disease Duration                     | 46 | 0.17  |
| Loss of Neurons Medulla        | 15 | Loss of Neurons Substantia Nigra     | 6  | 0.17  |
| Loss of Neurons Medulla        | 15 | Lewy Body Disease in Final Diagnosis | 2  | -0.14 |
| Loss of Neurons Medulla        | 15 | Familial ALS                         | 1  | -0.10 |
| Loss of Neurons Medulla        | 15 | Infarcts                             | 1  | -0.10 |
| Loss of Neurons Medulla        | 15 | Brain Mass                           | 46 | 0.07  |



|                             |    |                                      |    |       |
|-----------------------------|----|--------------------------------------|----|-------|
| Loss of Neurons Medulla     | 15 | Gender (1 = m, 2 = f)                | 46 | -0.06 |
| Loss of Neurons Medulla     | 15 | Onset Age                            | 46 | -0.06 |
| Loss of Neurons Medulla     | 15 | Diagnosis Age                        | 46 | -0.06 |
| Loss of Neurons Medulla     | 15 | Microinfarcts                        | 3  | 0.04  |
| Loss of Neurons Medulla     | 15 | Tau Pathology/Tauopathy              | 8  | 0.03  |
| Loss of Neurons Medulla     | 15 | Age of Death                         | 46 | -0.02 |
| Loss of Neurons Medulla     | 15 | Diagnostic Delay                     | 46 | 0.02  |
| Loss of Neurons Medulla     | 15 | AD in Final Diagnosis                | 10 | 0.00  |
| Loss of Neurons Spinal Cord | 11 | Loss of Neurons Anterior Horns       | 20 | -0.36 |
| Loss of Neurons Spinal Cord | 11 | Disease Duration                     | 46 | 0.32  |
| Loss of Neurons Spinal Cord | 11 | Diagnostic Delay                     | 46 | 0.29  |
| Loss of Neurons Spinal Cord | 11 | AD in Final Diagnosis                | 10 | 0.25  |
| Loss of Neurons Spinal Cord | 11 | Loss of Neurons Dentate Nucleus      | 8  | 0.18  |
| Loss of Neurons Spinal Cord | 11 | Brain Mass                           | 46 | 0.18  |
| Loss of Neurons Spinal Cord | 11 | Loss of Neurons Substantia Nigra     | 6  | 0.16  |
| Loss of Neurons Spinal Cord | 11 | Gender (1 = m, 2 = f)                | 46 | 0.16  |
| Loss of Neurons Spinal Cord | 11 | FTLD in Final Diagnosis              | 12 | 0.13  |
| Loss of Neurons Spinal Cord | 11 | FTD in Final Diagnosis               | 3  | 0.12  |
| Loss of Neurons Spinal Cord | 11 | Lewy Body Disease in Final Diagnosis | 2  | -0.11 |
| Loss of Neurons Spinal Cord | 11 | Loss of Neurons Medulla              | 15 | 0.09  |
| Loss of Neurons Spinal Cord | 11 | Familial ALS                         | 1  | -0.08 |
| Loss of Neurons Spinal Cord | 11 | Infarcts                             | 1  | -0.08 |
| Loss of Neurons Spinal Cord | 11 | Onset Age                            | 46 | -0.07 |
| Loss of Neurons Spinal Cord | 11 | Loss of Neurons Locus Ceruleus       | 6  | 0.05  |
| Loss of Neurons Spinal Cord | 11 | Tau Pathology/Tauopathy              | 8  | -0.04 |
| Loss of Neurons Spinal Cord | 11 | Diagnosis Age                        | 46 | -0.04 |
| Loss of Neurons Spinal Cord | 11 | Microinfarcts                        | 3  | 0.02  |
| Loss of Neurons Spinal Cord | 11 | Age of Death                         | 46 | -0.01 |

|                                  |    |                                      |    |       |
|----------------------------------|----|--------------------------------------|----|-------|
| Loss of Neurons Substantia Nigra | 6  | Lewy Body Disease in Final Diagnosis | 2  | 0.29  |
| Loss of Neurons Substantia Nigra | 6  | Brain Mass                           | 46 | 0.20  |
| Loss of Neurons Substantia Nigra | 6  | Tau Pathology/Tauopathy              | 8  | 0.16  |
| Loss of Neurons Substantia Nigra | 6  | FTLD in Final Diagnosis              | 12 | 0.12  |
| Loss of Neurons Substantia Nigra | 6  | AD in Final Diagnosis                | 10 | 0.11  |
| Loss of Neurons Substantia Nigra | 6  | FTD in Final Diagnosis               | 3  | -0.10 |
| Loss of Neurons Substantia Nigra | 6  | Microinfarcts                        | 3  | -0.10 |
| Loss of Neurons Substantia Nigra | 6  | Age of Death                         | 46 | 0.10  |
| Loss of Neurons Substantia Nigra | 6  | Onset Age                            | 46 | 0.08  |
| Loss of Neurons Substantia Nigra | 6  | Diagnosis Age                        | 46 | 0.08  |
| Loss of Neurons Substantia Nigra | 6  | Infarcts                             | 1  | -0.06 |
| Loss of Neurons Substantia Nigra | 6  | Familial ALS                         | 1  | -0.06 |
| Loss of Neurons Substantia Nigra | 6  | Disease Duration                     | 46 | 0.04  |
| Loss of Neurons Substantia Nigra | 6  | Diagnostic Delay                     | 46 | -0.04 |
| Loss of Neurons Substantia Nigra | 6  | Gender (1 = m, 2 = f)                | 46 | -0.03 |
| Loss Purkinje Cells              | 39 | FTD in Final Diagnosis               | 3  | -0.35 |
| Loss Purkinje Cells              | 39 | Ventral Nerve Roots Atrophy          | 30 | 0.30  |
| Loss Purkinje Cells              | 39 | FTLD in Final Diagnosis              | 12 | 0.29  |
| Loss Purkinje Cells              | 39 | Loss of Neurons Dentate Nucleus      | 8  | 0.28  |
| Loss Purkinje Cells              | 39 | Loss of Neurons Medulla              | 15 | 0.26  |
| Loss Purkinje Cells              | 39 | Gender (1 = m, 2 = f)                | 46 | 0.25  |
| Loss Purkinje Cells              | 39 | Loss of Neurons Amygdala             | 2  | 0.24  |
| Loss Purkinje Cells              | 39 | Brain Mass                           | 46 | -0.24 |
| Loss Purkinje Cells              | 39 | Loss of Neurons Anterior Horns       | 20 | 0.21  |
| Loss Purkinje Cells              | 39 | Diagnostic Delay                     | 46 | -0.17 |
| Loss Purkinje Cells              | 39 | Loss of Neurons Substantia Nigra     | 6  | 0.14  |
| Loss Purkinje Cells              | 39 | Age of Death                         | 46 | 0.12  |
| Loss Purkinje Cells              | 39 | Onset Age                            | 46 | 0.11  |
| Loss Purkinje Cells              | 39 | Familial ALS                         | 1  | 0.10  |
| Loss Purkinje Cells              | 39 | Paraspinal Muscle Fiber Atrophy      | 26 | -0.10 |
| Loss Purkinje Cells              | 39 | Diagnosis Age                        | 46 | 0.09  |
| Loss Purkinje Cells              | 39 | Infarcts                             | 1  | -0.08 |
| Loss Purkinje Cells              | 39 | Loss of Neurons Gyrus                | 1  | -0.08 |

|                     |    |                                             |    |       |
|---------------------|----|---------------------------------------------|----|-------|
| Loss Purkinje Cells | 39 | Denervation                                 | 31 | 0.07  |
| Loss Purkinje Cells | 39 | Loss of Neurons Locus Ceruleus              | 6  | 0.07  |
| Loss Purkinje Cells | 39 | Diaphragm Atrophy                           | 25 | -0.07 |
| Loss Purkinje Cells | 39 | Loss of Neurons Spinal Cord                 | 11 | 0.05  |
| Loss Purkinje Cells | 39 | AD in Final Diagnosis                       | 10 | 0.04  |
| Loss Purkinje Cells | 39 | Disease Duration                            | 46 | -0.04 |
| Loss Purkinje Cells | 39 | Tau Pathology/Tauopathy                     | 8  | -0.03 |
| Loss Purkinje Cells | 39 | Microinfarcts                               | 3  | -0.03 |
| Loss Purkinje Cells | 39 | Lewy Body Disease in Final Diagnosis        | 2  | 0.02  |
| Lower Limb          | 13 | Limb                                        | 30 | 0.57  |
| Lower Limb          | 13 | Substantia Nigra Pigmentary Incontinence    | 32 | -0.28 |
| Lower Limb          | 13 | Cingulate Cortex Neurofibrillary Tangles    | 2  | -0.24 |
| Lower Limb          | 13 | Loss of Neurons Substantia Nigra            | 6  | -0.23 |
| Lower Limb          | 13 | Loss of Neurons Gyrus                       | 1  | 0.22  |
| Lower Limb          | 13 | Loss of Neurons Locus Ceruleus              | 6  | -0.21 |
| Lower Limb          | 13 | Thalamus Neurofibrillary Tangles            | 7  | 0.20  |
| Lower Limb          | 13 | Brain Neuron Loss                           | 38 | -0.19 |
| Lower Limb          | 13 | Locus Ceruleus Neurofibrillary Tangles      | 14 | -0.19 |
| Lower Limb          | 13 | Anterior Horn Cells Neurofibrillary Tangles | 2  | 0.18  |
| Lower Limb          | 13 | Loss of Neurons Amygdala                    | 2  | -0.15 |
| Lower Limb          | 13 | Nucleus Basalis Neurofibrillary Tangles     | 20 | -0.15 |
| Lower Limb          | 13 | Lewy Body Formation                         | 5  | 0.15  |
| Lower Limb          | 13 | Loss of Neurons Anterior Horns              | 20 | -0.14 |
| Lower Limb          | 13 | Brain Atrophy                               | 9  | -0.14 |
| Lower Limb          | 13 | Gender (1 = m, 2 = f)                       | 46 | 0.14  |
| Lower Limb          | 13 | Diagnostic Delay                            | 46 | 0.14  |
| Lower Limb          | 13 | Denervation                                 | 31 | -0.14 |
| Lower Limb          | 13 | Atherosclerosis                             | 16 | -0.13 |
| Lower Limb          | 13 | FTLD in Final Diagnosis                     | 12 | -0.12 |
| Lower Limb          | 13 | Age of Death                                | 46 | -0.12 |
| Lower Limb          | 13 | Hippocampus Neurofibrillary Tangles         | 17 | 0.12  |
| Lower Limb          | 13 | Paraspinal Muscle Fiber Atrophy             | 26 | -0.11 |
| Lower Limb          | 13 | Lateral Corticospinal Tract Degeneration    | 41 | -0.11 |
| Lower Limb          | 13 | Loss of Neurons Dentate Nucleus             | 8  | -0.11 |
| Lower Limb          | 13 | Disease Duration                            | 46 | -0.10 |
| Lower Limb          | 13 | Bulbar                                      | 12 | -0.10 |
| Lower Limb          | 13 | Brain Mass                                  | 46 | 0.09  |
| Lower Limb          | 13 | Loss Purkinje Cells                         | 39 | -0.09 |
| Lower Limb          | 13 | Loss of Neurons Medulla                     | 15 | 0.09  |
| Lower Limb          | 13 | Ventricular Dilation                        | 6  | -0.09 |
| Lower Limb          | 13 | Entorhinal Cortex Neurofibrillary           | 28 | 0.09  |

|               |    |                                                       |    |       |
|---------------|----|-------------------------------------------------------|----|-------|
|               |    | Tangles                                               |    |       |
| Lower Limb    | 13 | Onset Age                                             | 46 | -0.09 |
| Lower Limb    | 13 | Neocortex Neurofibrillary Tangles                     | 2  | -0.08 |
| Lower Limb    | 13 | Diaphragm Atrophy                                     | 25 | -0.08 |
| Lower Limb    | 13 | Diagnosis Age                                         | 46 | -0.07 |
| Lower Limb    | 13 | Microinfarcts                                         | 3  | 0.07  |
| Lower Limb    | 13 | FTD in Final Diagnosis                                | 3  | 0.07  |
| Lower Limb    | 13 | Insular Cortex Neurofibrillary Tangles                | 10 | 0.06  |
| Lower Limb    | 13 | Tau Pathology/Tauopathy                               | 8  | -0.06 |
| Lower Limb    | 13 | Betz Cell Loss                                        | 35 | 0.06  |
| Lower Limb    | 13 | Amygdala Neurofibrillary Tangles                      | 20 | 0.05  |
| Lower Limb    | 13 | Basal Ganglia Neurofibrillary Tangles                 | 1  | -0.05 |
| Lower Limb    | 13 | Familial ALS                                          | 1  | -0.05 |
| Lower Limb    | 13 | Infarcts                                              | 1  | -0.05 |
| Lower Limb    | 13 | Occipital Cortex Neurofibrillary Tangles              | 1  | -0.05 |
| Lower Limb    | 13 | Parietal Cortex Neurofibrillary Tangles               | 1  | -0.05 |
| Lower Limb    | 13 | Caudate Nucleus Neurofibrillary Tangles               | 1  | -0.05 |
| Lower Limb    | 13 | Putamen Neurofibrillary Tangles                       | 1  | -0.05 |
| Lower Limb    | 13 | Dentate Nucleus of Cerebellum Neurofibrillary Tangles | 1  | -0.05 |
| Lower Limb    | 13 | Ventral Root Atrophy                                  | 30 | -0.05 |
| Lower Limb    | 13 | AD in Final Diagnosis                                 | 10 | -0.04 |
| Lower Limb    | 13 | General Spinal Cord Atrophy                           | 4  | 0.04  |
| Lower Limb    | 13 | Temporal Cortex Neurofibrillary Tangles               | 7  | -0.04 |
| Lower Limb    | 13 | Hypothalamus Neurofibrillary Tangles                  | 10 | -0.03 |
| Lower Limb    | 13 | Substantia Nigra Neurofibrillary Tangles              | 6  | -0.03 |
| Lower Limb    | 13 | Locus Ceruleus Pigmentary Incontinence                | 35 | 0.03  |
| Lower Limb    | 13 | Anterior Corticospinal Tract Degeneration             | 33 | -0.03 |
| Lower Limb    | 13 | Lewy Body Disease in Final Diagnosis                  | 2  | 0.02  |
| Lower Limb    | 13 | TDP-43                                                | 37 | -0.02 |
| Lower Limb    | 13 | Ventral Nerve Roots Atrophy                           | 30 | -0.01 |
| Lower Limb    | 13 | Loss of Neurons Spinal Cord                           | 11 | 0.01  |
| Lower Limb    | 13 | NFT (any location)                                    | 36 | -0.01 |
| Lower Limb    | 13 | Frontal Cortex Neurofibrillary Tangles                | 6  | 0.01  |
| Microinfarcts | 3  | Infarcts                                              | 1  | 0.56  |
| Microinfarcts | 3  | Age of Death                                          | 46 | 0.29  |
| Microinfarcts | 3  | Diagnosis Age                                         | 46 | 0.27  |
| Microinfarcts | 3  | Onset Age                                             | 46 | 0.27  |

|                                   |   |                                           |    |       |
|-----------------------------------|---|-------------------------------------------|----|-------|
| Microinfarcts                     | 3 | FTLD in Final Diagnosis                   | 12 | 0.24  |
| Microinfarcts                     | 3 | AD in Final Diagnosis                     | 10 | -0.14 |
| Microinfarcts                     | 3 | FTD in Final Diagnosis                    | 3  | -0.07 |
| Microinfarcts                     | 3 | Brain Mass                                | 46 | -0.06 |
| Microinfarcts                     | 3 | Disease Duration                          | 46 | -0.06 |
| Microinfarcts                     | 3 | Lewy Body Disease in Final Diagnosis      | 2  | -0.06 |
| Microinfarcts                     | 3 | Diagnostic Delay                          | 46 | -0.02 |
| Microinfarcts                     | 3 | Gender (1 = m, 2 = f)                     | 46 | -0.02 |
| Neocortex Neurofibrillary Tangles | 2 | Basal Ganglia Neurofibrillary Tangles     | 1  | 0.78  |
| Neocortex Neurofibrillary Tangles | 2 | Occipital Cortex Neurofibrillary Tangles  | 1  | 0.61  |
| Neocortex Neurofibrillary Tangles | 2 | Locus Ceruleus Neurofibrillary Tangles    | 14 | 0.51  |
| Neocortex Neurofibrillary Tangles | 2 | Tau Pathology/Tauopathy                   | 8  | 0.46  |
| Neocortex Neurofibrillary Tangles | 2 | Substantia Nigra Neurofibrillary Tangles  | 6  | 0.45  |
| Neocortex Neurofibrillary Tangles | 2 | FTD in Final Diagnosis                    | 3  | 0.42  |
| Neocortex Neurofibrillary Tangles | 2 | Diaphragm Atrophy                         | 25 | 0.31  |
| Neocortex Neurofibrillary Tangles | 2 | Anterior Corticospinal Tract Degeneration | 33 | -0.28 |
| Neocortex Neurofibrillary Tangles | 2 | Paraspinal Muscle Fiber Atrophy           | 26 | 0.28  |
| Neocortex Neurofibrillary Tangles | 2 | Nucleus Basalis Neurofibrillary Tangles   | 20 | 0.25  |
| Neocortex Neurofibrillary Tangles | 2 | Hypothalamus Neurofibrillary Tangles      | 10 | 0.24  |
| Neocortex Neurofibrillary Tangles | 2 | Amygdala Neurofibrillary Tangles          | 20 | 0.24  |
| Neocortex Neurofibrillary Tangles | 2 | Loss of Neurons Anterior Horns            | 20 | 0.21  |
| Neocortex Neurofibrillary Tangles | 2 | Brain Mass                                | 46 | 0.21  |
| Neocortex Neurofibrillary Tangles | 2 | Thalamus Neurofibrillary Tangles          | 7  | 0.16  |
| Neocortex Neurofibrillary Tangles | 2 | Gender (1 = m, 2 = f)                     | 46 | -0.16 |
| Neocortex Neurofibrillary Tangles | 2 | Age of Death                              | 46 | -0.14 |
| Neocortex Neurofibrillary Tangles | 2 | Loss of Neurons Medulla                   | 15 | -0.14 |
| Neocortex Neurofibrillary Tangles | 2 | Entorhinal Cortex Neurofibrillary Tangles | 28 | 0.14  |

|                                   |   |                                          |    |       |
|-----------------------------------|---|------------------------------------------|----|-------|
| Neocortex Neurofibrillary Tangles | 2 | Denervation                              | 31 | 0.13  |
| Neocortex Neurofibrillary Tangles | 2 | FTLD in Final Diagnosis                  | 12 | -0.13 |
| Neocortex Neurofibrillary Tangles | 2 | Disease Duration                         | 46 | -0.12 |
| Neocortex Neurofibrillary Tangles | 2 | Betz Cell Loss                           | 35 | 0.11  |
| Neocortex Neurofibrillary Tangles | 2 | AD in Final Diagnosis                    | 10 | -0.11 |
| Neocortex Neurofibrillary Tangles | 2 | Loss of Neurons Spinal Cord              | 11 | -0.11 |
| Neocortex Neurofibrillary Tangles | 2 | Diagnosis Age                            | 46 | -0.11 |
| Neocortex Neurofibrillary Tangles | 2 | Lateral Corticospinal Tract Degeneration | 41 | -0.11 |
| Neocortex Neurofibrillary Tangles | 2 | Onset Age                                | 46 | -0.10 |
| Neocortex Neurofibrillary Tangles | 2 | Insular Cortex Neurofibrillary Tangles   | 10 | -0.10 |
| Neocortex Neurofibrillary Tangles | 2 | Loss of Neurons Dentate Nucleus          | 8  | -0.09 |
| Neocortex Neurofibrillary Tangles | 2 | Loss of Neurons Substantia Nigra         | 6  | -0.08 |
| Neocortex Neurofibrillary Tangles | 2 | Loss of Neurons Locus Ceruleus           | 6  | -0.08 |
| Neocortex Neurofibrillary Tangles | 2 | Temporal Cortex Neurofibrillary Tangles  | 7  | -0.08 |
| Neocortex Neurofibrillary Tangles | 2 | Lewy Body Formation                      | 5  | -0.07 |
| Neocortex Neurofibrillary Tangles | 2 | Frontal Cortex Neurofibrillary Tangles   | 6  | -0.07 |
| Neocortex Neurofibrillary Tangles | 2 | Microinfarcts                            | 3  | -0.06 |
| Neocortex Neurofibrillary Tangles | 2 | Diagnostic Delay                         | 46 | -0.05 |
| Neocortex Neurofibrillary Tangles | 2 | Lewy Body Disease in Final Diagnosis     | 2  | -0.05 |
| Neocortex Neurofibrillary Tangles | 2 | Loss of Neurons Amygdala                 | 2  | -0.04 |
| Neocortex Neurofibrillary Tangles | 2 | Cingulate Cortex Neurofibrillary Tangles | 2  | -0.04 |
| Neocortex Neurofibrillary Tangles | 2 | Locus Ceruleus Pigmentary Incontinence   | 35 | 0.03  |
| Neocortex Neurofibrillary Tangles | 2 | Familial ALS                             | 1  | -0.03 |
| Neocortex Neurofibrillary Tangles | 2 | Infarcts                                 | 1  | -0.03 |

|                                   |    |                                                       |    |       |
|-----------------------------------|----|-------------------------------------------------------|----|-------|
| Neocortex Neurofibrillary Tangles | 2  | Parietal Cortex Neurofibrillary Tangles               | 1  | -0.03 |
| Neocortex Neurofibrillary Tangles | 2  | Dentate Nucleus of Cerebellum Neurofibrillary Tangles | 1  | -0.03 |
| Neocortex Neurofibrillary Tangles | 2  | Loss of Neurons Gyrus                                 | 1  | -0.03 |
| Neocortex Neurofibrillary Tangles | 2  | Hippocampus Neurofibrillary Tangles                   | 17 | 0.02  |
| Neocortex Neurofibrillary Tangles | 2  | Ventral Nerve Roots Atrophy                           | 30 | -0.02 |
| Neocortex Neurofibrillary Tangles | 2  | Substantia Nigra Pigmentary Incontinence              | 32 | 0.00  |
| Neocortex Neurofibrillary Tangles | 2  | Loss Purkinje Cells                                   | 39 | 0.00  |
| NFT (any location)                | 36 | Hypothalamus Neurofibrillary Tangles                  | 10 | 0.79  |
| NFT (any location)                | 36 | Amygdala Neurofibrillary Tangles                      | 20 | 0.77  |
| NFT (any location)                | 36 | Nucleus Basalis Neurofibrillary Tangles               | 20 | 0.75  |
| NFT (any location)                | 36 | Entorhinal Cortex Neurofibrillary Tangles             | 28 | 0.72  |
| NFT (any location)                | 36 | Substantia Nigra Neurofibrillary Tangles              | 6  | 0.70  |
| NFT (any location)                | 36 | Locus Ceruleus Neurofibrillary Tangles                | 14 | 0.68  |
| NFT (any location)                | 36 | Insular Cortex Neurofibrillary Tangles                | 10 | 0.64  |
| NFT (any location)                | 36 | Thalamus Neurofibrillary Tangles                      | 7  | 0.62  |
| NFT (any location)                | 36 | Hippocampus Neurofibrillary Tangles                   | 17 | 0.58  |
| NFT (any location)                | 36 | Temporal Cortex Neurofibrillary Tangles               | 7  | 0.41  |
| NFT (any location)                | 36 | AD in Final Diagnosis                                 | 10 | 0.35  |
| NFT (any location)                | 36 | Basal Ganglia Neurofibrillary Tangles                 | 1  | 0.35  |
| NFT (any location)                | 36 | Caudate Nucleus Neurofibrillary Tangles               | 1  | 0.35  |
| NFT (any location)                | 36 | Putamen Neurofibrillary Tangles                       | 1  | 0.35  |
| NFT (any location)                | 36 | Neocortex Neurofibrillary Tangles                     | 2  | 0.34  |
| NFT (any location)                | 36 | FTLD in Final Diagnosis                               | 12 | 0.32  |
| NFT (any location)                | 36 | Locus Ceruleus Pigmentary Incontinence                | 35 | 0.31  |
| NFT (any location)                | 36 | TDP-43                                                | 37 | 0.30  |
| NFT (any location)                | 36 | Cingulate Cortex Neurofibrillary Tangles              | 2  | 0.30  |
| NFT (any location)                | 36 | Brain Atrophy                                         | 9  | 0.29  |
| NFT (any location)                | 36 | Ventral Nerve Roots Atrophy                           | 30 | 0.27  |
| NFT (any location)                | 36 | Atherosclerosis                                       | 16 | 0.26  |
| NFT (any location)                | 36 | Onset Age                                             | 46 | 0.26  |
| NFT (any location)                | 36 | Age of Death                                          | 46 | 0.26  |

|                                         |    |                                                       |    |       |
|-----------------------------------------|----|-------------------------------------------------------|----|-------|
| NFT (any location)                      | 36 | Diagnosis Age                                         | 46 | 0.26  |
| NFT (any location)                      | 36 | Loss of Neurons Locus Ceruleus                        | 6  | -0.25 |
| NFT (any location)                      | 36 | Loss of Neurons Dentate Nucleus                       | 8  | 0.22  |
| NFT (any location)                      | 36 | Loss Purkinje Cells                                   | 39 | 0.22  |
| NFT (any location)                      | 36 | Ventricular Dilatation                                | 6  | 0.21  |
| NFT (any location)                      | 36 | Loss of Neurons Spinal Cord                           | 11 | 0.20  |
| NFT (any location)                      | 36 | Frontal Cortex Neurofibrillary Tangles                | 6  | 0.20  |
| NFT (any location)                      | 36 | Dentate Nucleus of Cerebellum Neurofibrillary Tangles | 1  | 0.19  |
| NFT (any location)                      | 36 | Denervation                                           | 31 | 0.17  |
| NFT (any location)                      | 36 | Diaphragm Atrophy                                     | 25 | 0.16  |
| NFT (any location)                      | 36 | Paraspinal Muscle Fiber Atrophy                       | 26 | 0.15  |
| NFT (any location)                      | 36 | Tau Pathology/Tauopathy                               | 8  | 0.15  |
| NFT (any location)                      | 36 | Disease Duration                                      | 46 | -0.14 |
| NFT (any location)                      | 36 | Loss of Neurons Substantia Nigra                      | 6  | -0.13 |
| NFT (any location)                      | 36 | Betz Cell Loss                                        | 35 | 0.13  |
| NFT (any location)                      | 36 | Lewy Body Formation                                   | 5  | 0.13  |
| NFT (any location)                      | 36 | Loss of Neurons Amygdala                              | 2  | 0.11  |
| NFT (any location)                      | 36 | Lewy Body Disease in Final Diagnosis                  | 2  | 0.11  |
| NFT (any location)                      | 36 | Occipital Cortex Neurofibrillary Tangles              | 1  | 0.10  |
| NFT (any location)                      | 36 | Loss of Neurons Gyrus                                 | 1  | -0.09 |
| NFT (any location)                      | 36 | Parietal Cortex Neurofibrillary Tangles               | 1  | -0.09 |
| NFT (any location)                      | 36 | Anterior Horn Cells Neurofibrillary Tangles           | 2  | -0.07 |
| NFT (any location)                      | 36 | Brain Mass                                            | 46 | 0.06  |
| NFT (any location)                      | 36 | Diagnostic Delay                                      | 46 | -0.06 |
| NFT (any location)                      | 36 | Substantia Nigra Pigmentary Incontinence              | 32 | -0.05 |
| NFT (any location)                      | 36 | FTD in Final Diagnosis                                | 3  | 0.04  |
| NFT (any location)                      | 36 | Loss of Neurons Anterior Horns                        | 20 | 0.04  |
| NFT (any location)                      | 36 | Gender (1 = m, 2 = f)                                 | 46 | -0.03 |
| NFT (any location)                      | 36 | Anterior Corticospinal Tract Degeneration             | 33 | 0.03  |
| NFT (any location)                      | 36 | Lateral Corticospinal Tract Degeneration              | 41 | -0.03 |
| NFT (any location)                      | 36 | Infarcts                                              | 1  | -0.02 |
| NFT (any location)                      | 36 | Familial ALS                                          | 1  | 0.02  |
| NFT (any location)                      | 36 | General Spinal Cord Atrophy                           | 4  | 0.01  |
| NFT (any location)                      | 36 | Ventral Root Atrophy                                  | 30 | -0.01 |
| NFT (any location)                      | 36 | Loss of Neurons Medulla                               | 15 | 0.01  |
| NFT (any location)                      | 36 | Microinfarcts                                         | 3  | 0.00  |
| Nucleus Basalis Neurofibrillary Tangles | 20 | Entorhinal Cortex Neurofibrillary Tangles             | 28 | 0.37  |
| Nucleus Basalis Neurofibrillary Tangles | 20 | Amygdala Neurofibrillary Tangles                      | 20 | 0.37  |



|                                         |    |                                          |    |       |
|-----------------------------------------|----|------------------------------------------|----|-------|
| Nucleus Basalis Neurofibrillary Tangles | 20 | Loss of Neurons Locus Ceruleus           | 6  | -0.27 |
| Nucleus Basalis Neurofibrillary Tangles | 20 | Tau Pathology/Tauopathy                  | 8  | 0.25  |
| Nucleus Basalis Neurofibrillary Tangles | 20 | Brain Mass                               | 46 | 0.24  |
| Nucleus Basalis Neurofibrillary Tangles | 20 | Loss of Neurons Spinal Cord              | 11 | 0.23  |
| Nucleus Basalis Neurofibrillary Tangles | 20 | Gender (1 = m, 2 = f)                    | 46 | -0.22 |
| Nucleus Basalis Neurofibrillary Tangles | 20 | FTLD in Final Diagnosis                  | 12 | 0.21  |
| Nucleus Basalis Neurofibrillary Tangles | 20 | Paraspinal Muscle Fiber Atrophy          | 26 | 0.19  |
| Nucleus Basalis Neurofibrillary Tangles | 20 | Hippocampus Neurofibrillary Tangles      | 17 | 0.16  |
| Nucleus Basalis Neurofibrillary Tangles | 20 | Ventral Nerve Roots Atrophy              | 30 | 0.16  |
| Nucleus Basalis Neurofibrillary Tangles | 20 | Diagnostic Delay                         | 46 | 0.15  |
| Nucleus Basalis Neurofibrillary Tangles | 20 | Loss of Neurons Dentate Nucleus          | 8  | 0.15  |
| Nucleus Basalis Neurofibrillary Tangles | 20 | Age of Death                             | 46 | 0.15  |
| Nucleus Basalis Neurofibrillary Tangles | 20 | Locus Ceruleus Pigmentary Incontinence   | 35 | 0.14  |
| Nucleus Basalis Neurofibrillary Tangles | 20 | Disease Duration                         | 46 | 0.13  |
| Nucleus Basalis Neurofibrillary Tangles | 20 | Microinfarcts                            | 3  | 0.13  |
| Nucleus Basalis Neurofibrillary Tangles | 20 | Loss of Neurons Medulla                  | 15 | 0.13  |
| Nucleus Basalis Neurofibrillary Tangles | 20 | Diagnosis Age                            | 46 | 0.12  |
| Nucleus Basalis Neurofibrillary Tangles | 20 | Familial ALS                             | 1  | -0.11 |
| Nucleus Basalis Neurofibrillary Tangles | 20 | Loss of Neurons Gyrus                    | 1  | -0.11 |
| Nucleus Basalis Neurofibrillary Tangles | 20 | Betz Cell Loss                           | 35 | 0.10  |
| Nucleus Basalis Neurofibrillary Tangles | 20 | Diaphragm Atrophy                        | 25 | 0.10  |
| Nucleus Basalis Neurofibrillary Tangles | 20 | Onset Age                                | 46 | 0.10  |
| Nucleus Basalis Neurofibrillary Tangles | 20 | AD in Final Diagnosis                    | 10 | 0.09  |
| Nucleus Basalis Neurofibrillary Tangles | 20 | Substantia Nigra Pigmentary Incontinence | 32 | 0.09  |

|                                          |    |                                           |    |       |
|------------------------------------------|----|-------------------------------------------|----|-------|
| Nucleus Basalis Neurofibrillary Tangles  | 20 | Lewy Body Disease in Final Diagnosis      | 2  | 0.08  |
| Nucleus Basalis Neurofibrillary Tangles  | 20 | Anterior Corticospinal Tract Degeneration | 33 | 0.08  |
| Nucleus Basalis Neurofibrillary Tangles  | 20 | Lewy Body Formation                       | 5  | -0.06 |
| Nucleus Basalis Neurofibrillary Tangles  | 20 | Loss of Neurons Substantia Nigra          | 6  | -0.06 |
| Nucleus Basalis Neurofibrillary Tangles  | 20 | Denervation                               | 31 | 0.05  |
| Nucleus Basalis Neurofibrillary Tangles  | 20 | Loss of Neurons Anterior Horns            | 20 | -0.05 |
| Nucleus Basalis Neurofibrillary Tangles  | 20 | Loss of Neurons Amygdala                  | 2  | -0.03 |
| Nucleus Basalis Neurofibrillary Tangles  | 20 | FTD in Final Diagnosis                    | 3  | 0.03  |
| Nucleus Basalis Neurofibrillary Tangles  | 20 | Loss Purkinje Cells                       | 39 | 0.02  |
| Nucleus Basalis Neurofibrillary Tangles  | 20 | Lateral Corticospinal Tract Degeneration  | 41 | 0.01  |
| Nucleus Basalis Neurofibrillary Tangles  | 20 | Infarcts                                  | 1  | 0.00  |
| Occipital Cortex Neurofibrillary Tangles | 1  | Locus Ceruleus Neurofibrillary Tangles    | 14 | 0.33  |
| Occipital Cortex Neurofibrillary Tangles | 1  | Tau Pathology/Tauopathy                   | 8  | 0.32  |
| Occipital Cortex Neurofibrillary Tangles | 1  | Ventral Nerve Roots Atrophy               | 30 | 0.21  |
| Occipital Cortex Neurofibrillary Tangles | 1  | Anterior Corticospinal Tract Degeneration | 33 | -0.20 |
| Occipital Cortex Neurofibrillary Tangles | 1  | Loss of Neurons Anterior Horns            | 20 | 0.19  |
| Occipital Cortex Neurofibrillary Tangles | 1  | Lateral Corticospinal Tract Degeneration  | 41 | 0.16  |
| Occipital Cortex Neurofibrillary Tangles | 1  | Hypothalamus Neurofibrillary Tangles      | 10 | 0.13  |
| Occipital Cortex Neurofibrillary Tangles | 1  | Gender (1 = m, 2 = f)                     | 46 | -0.11 |
| Occipital Cortex Neurofibrillary Tangles | 1  | Disease Duration                          | 46 | -0.10 |
| Occipital Cortex Neurofibrillary Tangles | 1  | Loss Purkinje Cells                       | 39 | 0.10  |
| Occipital Cortex Neurofibrillary Tangles | 1  | Hippocampus Neurofibrillary Tangles       | 17 | -0.10 |
| Occipital Cortex Neurofibrillary Tangles | 1  | Loss of Neurons Medulla                   | 15 | -0.10 |
| Occipital Cortex Neurofibrillary Tangles | 1  | FTLD in Final Diagnosis                   | 12 | -0.09 |

|                                          |   |                                          |    |       |
|------------------------------------------|---|------------------------------------------|----|-------|
| Occipital Cortex Neurofibrillary Tangles | 1 | Diaphragm Atrophy                        | 25 | 0.09  |
| Occipital Cortex Neurofibrillary Tangles | 1 | Diagnostic Delay                         | 46 | -0.09 |
| Occipital Cortex Neurofibrillary Tangles | 1 | AD in Final Diagnosis                    | 10 | -0.08 |
| Occipital Cortex Neurofibrillary Tangles | 1 | Loss of Neurons Spinal Cord              | 11 | -0.08 |
| Occipital Cortex Neurofibrillary Tangles | 1 | Paraspinal Muscle Fiber Atrophy          | 26 | 0.07  |
| Occipital Cortex Neurofibrillary Tangles | 1 | Insular Cortex Neurofibrillary Tangles   | 10 | -0.07 |
| Occipital Cortex Neurofibrillary Tangles | 1 | Loss of Neurons Dentate Nucleus          | 8  | -0.07 |
| Occipital Cortex Neurofibrillary Tangles | 1 | Age of Death                             | 46 | -0.06 |
| Occipital Cortex Neurofibrillary Tangles | 1 | Thalamus Neurofibrillary Tangles         | 7  | -0.06 |
| Occipital Cortex Neurofibrillary Tangles | 1 | Brain Mass                               | 46 | 0.06  |
| Occipital Cortex Neurofibrillary Tangles | 1 | Denervation                              | 31 | -0.06 |
| Occipital Cortex Neurofibrillary Tangles | 1 | Loss of Neurons Substantia Nigra         | 6  | -0.06 |
| Occipital Cortex Neurofibrillary Tangles | 1 | Loss of Neurons Locus Ceruleus           | 6  | -0.05 |
| Occipital Cortex Neurofibrillary Tangles | 1 | Temporal Cortex Neurofibrillary Tangles  | 7  | -0.05 |
| Occipital Cortex Neurofibrillary Tangles | 1 | Nucleus Basalis Neurofibrillary Tangles  | 20 | 0.05  |
| Occipital Cortex Neurofibrillary Tangles | 1 | Substantia Nigra Neurofibrillary Tangles | 6  | -0.05 |
| Occipital Cortex Neurofibrillary Tangles | 1 | Lewy Body Formation                      | 5  | -0.05 |
| Occipital Cortex Neurofibrillary Tangles | 1 | Amygdala Neurofibrillary Tangles         | 20 | 0.05  |
| Occipital Cortex Neurofibrillary Tangles | 1 | Frontal Cortex Neurofibrillary Tangles   | 6  | -0.05 |
| Occipital Cortex Neurofibrillary Tangles | 1 | Diagnosis Age                            | 46 | -0.04 |
| Occipital Cortex Neurofibrillary Tangles | 1 | FTD in Final Diagnosis                   | 3  | -0.04 |
| Occipital Cortex Neurofibrillary Tangles | 1 | Microinfarcts                            | 3  | -0.04 |
| Occipital Cortex Neurofibrillary Tangles | 1 | Lewy Body Disease in Final Diagnosis     | 2  | -0.03 |
| Occipital Cortex Neurofibrillary Tangles | 1 | Onset Age                                | 46 | -0.03 |

|                                          |    |                                                       |    |       |
|------------------------------------------|----|-------------------------------------------------------|----|-------|
| Occipital Cortex Neurofibrillary Tangles | 1  | Loss of Neurons Amygdala                              | 2  | -0.03 |
| Occipital Cortex Neurofibrillary Tangles | 1  | Locus Ceruleus Pigmentary Incontinence                | 35 | 0.02  |
| Occipital Cortex Neurofibrillary Tangles | 1  | Dentate Nucleus of Cerebellum Neurofibrillary Tangles | 1  | -0.02 |
| Occipital Cortex Neurofibrillary Tangles | 1  | Familial ALS                                          | 1  | -0.02 |
| Occipital Cortex Neurofibrillary Tangles | 1  | Infarcts                                              | 1  | -0.02 |
| Occipital Cortex Neurofibrillary Tangles | 1  | Loss of Neurons Gyrus                                 | 1  | -0.02 |
| Occipital Cortex Neurofibrillary Tangles | 1  | Parietal Cortex Neurofibrillary Tangles               | 1  | -0.02 |
| Occipital Cortex Neurofibrillary Tangles | 1  | Entorhinal Cortex Neurofibrillary Tangles             | 28 | -0.01 |
| Occipital Cortex Neurofibrillary Tangles | 1  | Betz Cell Loss                                        | 35 | -0.01 |
| Occipital Cortex Neurofibrillary Tangles | 1  | Substantia Nigra Pigmentary Incontinence              | 32 | 0.00  |
| Onset Age                                | 46 | Age of Death                                          | 46 | 0.98  |
| Onset Age                                | 46 | Gender (1 = m, 2 = f)                                 | 46 | 0.02  |
| Paraspinal Muscle Fiber Atrophy          | 26 | Diaphragm Atrophy                                     | 25 | 0.84  |
| Paraspinal Muscle Fiber Atrophy          | 26 | Denervation                                           | 31 | 0.49  |
| Paraspinal Muscle Fiber Atrophy          | 26 | Loss of Neurons Spinal Cord                           | 11 | 0.39  |
| Paraspinal Muscle Fiber Atrophy          | 26 | Disease Duration                                      | 46 | 0.27  |
| Paraspinal Muscle Fiber Atrophy          | 26 | FTLD in Final Diagnosis                               | 12 | -0.23 |
| Paraspinal Muscle Fiber Atrophy          | 26 | Tau Pathology/Tauopathy                               | 8  | 0.22  |
| Paraspinal Muscle Fiber Atrophy          | 26 | Ventral Nerve Roots Atrophy                           | 30 | 0.21  |
| Paraspinal Muscle Fiber Atrophy          | 26 | Gender (1 = m, 2 = f)                                 | 46 | 0.20  |
| Paraspinal Muscle Fiber Atrophy          | 26 | Loss of Neurons Medulla                               | 15 | -0.17 |
| Paraspinal Muscle Fiber Atrophy          | 26 | Familial ALS                                          | 1  | -0.15 |
| Paraspinal Muscle Fiber Atrophy          | 26 | Infarcts                                              | 1  | -0.15 |
| Paraspinal Muscle Fiber Atrophy          | 26 | AD in Final Diagnosis                                 | 10 | 0.14  |
| Paraspinal Muscle Fiber Atrophy          | 26 | Diagnosis Age                                         | 46 | -0.14 |

|                                         |    |                                           |    |       |
|-----------------------------------------|----|-------------------------------------------|----|-------|
| Paraspinal Muscle Fiber Atrophy         | 26 | Onset Age                                 | 46 | -0.13 |
| Paraspinal Muscle Fiber Atrophy         | 26 | Microinfarcts                             | 3  | -0.13 |
| Paraspinal Muscle Fiber Atrophy         | 26 | FTD in Final Diagnosis                    | 3  | 0.13  |
| Paraspinal Muscle Fiber Atrophy         | 26 | Loss of Neurons Substantia Nigra          | 6  | 0.13  |
| Paraspinal Muscle Fiber Atrophy         | 26 | Loss of Neurons Amygdala                  | 2  | 0.10  |
| Paraspinal Muscle Fiber Atrophy         | 26 | Loss of Neurons Locus Ceruleus            | 6  | 0.10  |
| Paraspinal Muscle Fiber Atrophy         | 26 | Age of Death                              | 46 | -0.08 |
| Paraspinal Muscle Fiber Atrophy         | 26 | Loss of Neurons Gyrus                     | 1  | 0.07  |
| Paraspinal Muscle Fiber Atrophy         | 26 | Loss of Neurons Anterior Horns            | 20 | -0.06 |
| Paraspinal Muscle Fiber Atrophy         | 26 | Loss of Neurons Dentate Nucleus           | 8  | 0.05  |
| Paraspinal Muscle Fiber Atrophy         | 26 | Lewy Body Disease in Final Diagnosis      | 2  | 0.02  |
| Paraspinal Muscle Fiber Atrophy         | 26 | Diagnostic Delay                          | 46 | 0.00  |
| Paraspinal Muscle Fiber Atrophy         | 26 | Brain Mass                                | 46 | 0.00  |
| Parietal Cortex Neurofibrillary Tangles | 1  | Tau Pathology/Tauopathy                   | 8  | 0.32  |
| Parietal Cortex Neurofibrillary Tangles | 1  | Diaphragm Atrophy                         | 25 | 0.32  |
| Parietal Cortex Neurofibrillary Tangles | 1  | Paraspinal Muscle Fiber Atrophy           | 26 | 0.29  |
| Parietal Cortex Neurofibrillary Tangles | 1  | Loss of Neurons Substantia Nigra          | 6  | 0.29  |
| Parietal Cortex Neurofibrillary Tangles | 1  | AD in Final Diagnosis                     | 10 | 0.28  |
| Parietal Cortex Neurofibrillary Tangles | 1  | Loss of Neurons Anterior Horns            | 20 | 0.27  |
| Parietal Cortex Neurofibrillary Tangles | 1  | Loss of Neurons Locus Ceruleus            | 6  | 0.24  |
| Parietal Cortex Neurofibrillary Tangles | 1  | Denervation                               | 31 | 0.21  |
| Parietal Cortex Neurofibrillary Tangles | 1  | Ventral Nerve Roots Atrophy               | 30 | 0.21  |
| Parietal Cortex Neurofibrillary Tangles | 1  | Disease Duration                          | 46 | 0.18  |
| Parietal Cortex Neurofibrillary Tangles | 1  | Anterior Corticospinal Tract Degeneration | 33 | 0.17  |

|                                         |   |                                           |    |       |
|-----------------------------------------|---|-------------------------------------------|----|-------|
| Parietal Cortex Neurofibrillary Tangles | 1 | Lateral Corticospinal Tract Degeneration  | 41 | 0.16  |
| Parietal Cortex Neurofibrillary Tangles | 1 | Entorhinal Cortex Neurofibrillary Tangles | 28 | -0.15 |
| Parietal Cortex Neurofibrillary Tangles | 1 | Loss of Neurons Medulla                   | 15 | 0.15  |
| Parietal Cortex Neurofibrillary Tangles | 1 | Gender (1 = m, 2 = f)                     | 46 | -0.11 |
| Parietal Cortex Neurofibrillary Tangles | 1 | Amygdala Neurofibrillary Tangles          | 20 | -0.11 |
| Parietal Cortex Neurofibrillary Tangles | 1 | Nucleus Basalis Neurofibrillary Tangles   | 20 | -0.11 |
| Parietal Cortex Neurofibrillary Tangles | 1 | Hippocampus Neurofibrillary Tangles       | 17 | -0.10 |
| Parietal Cortex Neurofibrillary Tangles | 1 | Locus Ceruleus Neurofibrillary Tangles    | 14 | -0.09 |
| Parietal Cortex Neurofibrillary Tangles | 1 | FTLD in Final Diagnosis                   | 12 | -0.09 |
| Parietal Cortex Neurofibrillary Tangles | 1 | Loss Purkinje Cells                       | 39 | -0.08 |
| Parietal Cortex Neurofibrillary Tangles | 1 | Loss of Neurons Spinal Cord               | 11 | -0.08 |
| Parietal Cortex Neurofibrillary Tangles | 1 | Betz Cell Loss                            | 35 | 0.07  |
| Parietal Cortex Neurofibrillary Tangles | 1 | Diagnostic Delay                          | 46 | -0.07 |
| Parietal Cortex Neurofibrillary Tangles | 1 | Loss of Neurons Dentate Nucleus           | 8  | -0.07 |
| Parietal Cortex Neurofibrillary Tangles | 1 | Age of Death                              | 46 | 0.06  |
| Parietal Cortex Neurofibrillary Tangles | 1 | Temporal Cortex Neurofibrillary Tangles   | 7  | -0.05 |
| Parietal Cortex Neurofibrillary Tangles | 1 | Substantia Nigra Neurofibrillary Tangles  | 6  | -0.05 |
| Parietal Cortex Neurofibrillary Tangles | 1 | Lewy Body Formation                       | 5  | -0.05 |
| Parietal Cortex Neurofibrillary Tangles | 1 | Frontal Cortex Neurofibrillary Tangles    | 6  | -0.05 |
| Parietal Cortex Neurofibrillary Tangles | 1 | FTD in Final Diagnosis                    | 3  | -0.04 |
| Parietal Cortex Neurofibrillary Tangles | 1 | Microinfarcts                             | 3  | -0.04 |
| Parietal Cortex Neurofibrillary Tangles | 1 | Brain Mass                                | 46 | -0.04 |
| Parietal Cortex Neurofibrillary Tangles | 1 | Lewy Body Disease in Final Diagnosis      | 2  | -0.03 |
| Parietal Cortex Neurofibrillary Tangles | 1 | Loss of Neurons Amygdala                  | 2  | -0.03 |

|                                         |   |                                           |    |       |
|-----------------------------------------|---|-------------------------------------------|----|-------|
| Parietal Cortex Neurofibrillary Tangles | 1 | Locus Ceruleus Pigmentary Incontinence    | 35 | 0.02  |
| Parietal Cortex Neurofibrillary Tangles | 1 | Infarcts                                  | 1  | -0.02 |
| Parietal Cortex Neurofibrillary Tangles | 1 | Familial ALS                              | 1  | -0.02 |
| Parietal Cortex Neurofibrillary Tangles | 1 | Loss of Neurons Gyrus                     | 1  | -0.02 |
| Parietal Cortex Neurofibrillary Tangles | 1 | Onset Age                                 | 46 | 0.01  |
| Parietal Cortex Neurofibrillary Tangles | 1 | Substantia Nigra Pigmentary Incontinence  | 32 | 0.00  |
| Parietal Cortex Neurofibrillary Tangles | 1 | Diagnosis Age                             | 46 | 0.00  |
| Putamen Neurofibrillary Tangles         | 1 | Thalamus Neurofibrillary Tangles          | 7  | 0.49  |
| Putamen Neurofibrillary Tangles         | 1 | Hypothalamus Neurofibrillary Tangles      | 10 | 0.41  |
| Putamen Neurofibrillary Tangles         | 1 | Hippocampus Neurofibrillary Tangles       | 17 | 0.37  |
| Putamen Neurofibrillary Tangles         | 1 | Amygdala Neurofibrillary Tangles          | 20 | 0.32  |
| Putamen Neurofibrillary Tangles         | 1 | AD in Final Diagnosis                     | 10 | 0.28  |
| Putamen Neurofibrillary Tangles         | 1 | Nucleus Basalis Neurofibrillary Tangles   | 20 | 0.27  |
| Putamen Neurofibrillary Tangles         | 1 | FTLD in Final Diagnosis                   | 12 | 0.25  |
| Putamen Neurofibrillary Tangles         | 1 | Entorhinal Cortex Neurofibrillary Tangles | 28 | 0.23  |
| Putamen Neurofibrillary Tangles         | 1 | Substantia Nigra Neurofibrillary Tangles  | 6  | 0.23  |
| Putamen Neurofibrillary Tangles         | 1 | Onset Age                                 | 46 | 0.23  |
| Putamen Neurofibrillary Tangles         | 1 | Diagnosis Age                             | 46 | 0.22  |
| Putamen Neurofibrillary Tangles         | 1 | Age of Death                              | 46 | 0.21  |
| Putamen Neurofibrillary Tangles         | 1 | Ventral Nerve Roots Atrophy               | 30 | 0.21  |
| Putamen Neurofibrillary Tangles         | 1 | Anterior Corticospinal Tract Degeneration | 33 | -0.20 |
| Putamen Neurofibrillary Tangles         | 1 | Disease Duration                          | 46 | -0.18 |
| Putamen Neurofibrillary Tangles         | 1 | Lateral Corticospinal Tract Degeneration  | 41 | -0.18 |
| Putamen Neurofibrillary Tangles         | 1 | Betz Cell Loss                            | 35 | -0.16 |

|                                 |   |                                          |    |       |
|---------------------------------|---|------------------------------------------|----|-------|
| Putamen Neurofibrillary Tangles | 1 | Diaphragm Atrophy                        | 25 | -0.15 |
| Putamen Neurofibrillary Tangles | 1 | Paraspinal Muscle Fiber Atrophy          | 26 | -0.15 |
| Putamen Neurofibrillary Tangles | 1 | Substantia Nigra Pigmentary Incontinence | 32 | -0.15 |
| Putamen Neurofibrillary Tangles | 1 | Loss of Neurons Anterior Horns           | 20 | -0.12 |
| Putamen Neurofibrillary Tangles | 1 | Diagnostic Delay                         | 46 | -0.11 |
| Putamen Neurofibrillary Tangles | 1 | Gender (1 = m, 2 = f)                    | 46 | -0.11 |
| Putamen Neurofibrillary Tangles | 1 | Loss of Neurons Medulla                  | 15 | -0.10 |
| Putamen Neurofibrillary Tangles | 1 | Loss of Neurons Spinal Cord              | 11 | 0.10  |
| Putamen Neurofibrillary Tangles | 1 | Locus Ceruleus Neurofibrillary Tangles   | 14 | 0.09  |
| Putamen Neurofibrillary Tangles | 1 | Loss Purkinje Cells                      | 39 | -0.08 |
| Putamen Neurofibrillary Tangles | 1 | Insular Cortex Neurofibrillary Tangles   | 10 | -0.07 |
| Putamen Neurofibrillary Tangles | 1 | Tau Pathology/Tauopathy                  | 8  | -0.07 |
| Putamen Neurofibrillary Tangles | 1 | Loss of Neurons Dentate Nucleus          | 8  | -0.07 |
| Putamen Neurofibrillary Tangles | 1 | Denervation                              | 31 | -0.06 |
| Putamen Neurofibrillary Tangles | 1 | Loss of Neurons Substantia Nigra         | 6  | -0.06 |
| Putamen Neurofibrillary Tangles | 1 | Loss of Neurons Locus Ceruleus           | 6  | -0.05 |
| Putamen Neurofibrillary Tangles | 1 | Temporal Cortex Neurofibrillary Tangles  | 7  | -0.05 |
| Putamen Neurofibrillary Tangles | 1 | Lewy Body Formation                      | 5  | -0.05 |
| Putamen Neurofibrillary Tangles | 1 | Frontal Cortex Neurofibrillary Tangles   | 6  | -0.05 |
| Putamen Neurofibrillary Tangles | 1 | FTD in Final Diagnosis                   | 3  | -0.04 |
| Putamen Neurofibrillary Tangles | 1 | Microinfarcts                            | 3  | -0.04 |
| Putamen Neurofibrillary Tangles | 1 | Lewy Body Disease in Final Diagnosis     | 2  | -0.03 |
| Putamen Neurofibrillary Tangles | 1 | Neocortex Neurofibrillary Tangles        | 2  | -0.03 |
| Putamen Neurofibrillary Tangles | 1 | Loss of Neurons Amygdala                 | 2  | -0.03 |



|                                 |    |                                                       |    |       |
|---------------------------------|----|-------------------------------------------------------|----|-------|
| Putamen Neurofibrillary Tangles | 1  | Cingulate Cortex Neurofibrillary Tangles              | 2  | -0.03 |
| Putamen Neurofibrillary Tangles | 1  | Locus Ceruleus Pigmentary Incontinence                | 35 | 0.02  |
| Putamen Neurofibrillary Tangles | 1  | Basal Ganglia Neurofibrillary Tangles                 | 1  | -0.02 |
| Putamen Neurofibrillary Tangles | 1  | Dentate Nucleus of Cerebellum Neurofibrillary Tangles | 1  | -0.02 |
| Putamen Neurofibrillary Tangles | 1  | Familial ALS                                          | 1  | -0.02 |
| Putamen Neurofibrillary Tangles | 1  | Infarcts                                              | 1  | -0.02 |
| Putamen Neurofibrillary Tangles | 1  | Loss of Neurons Gyrus                                 | 1  | -0.02 |
| Putamen Neurofibrillary Tangles | 1  | Occipital Cortex Neurofibrillary Tangles              | 1  | -0.02 |
| Putamen Neurofibrillary Tangles | 1  | Parietal Cortex Neurofibrillary Tangles               | 1  | -0.02 |
| Putamen Neurofibrillary Tangles | 1  | Brain Mass                                            | 46 | 0.01  |
| Rilutek                         | 29 | Lower Limb                                            | 13 | 0.53  |
| Rilutek                         | 29 | Upper limb                                            | 17 | 0.39  |
| Rilutek                         | 29 | Limb                                                  | 30 | 0.39  |
| Rilutek                         | 29 | Cingulate Cortex Neurofibrillary Tangles              | 2  | -0.30 |
| Rilutek                         | 29 | Disease Duration                                      | 46 | -0.30 |
| Rilutek                         | 29 | Ventral Root Atrophy                                  | 30 | 0.29  |
| Rilutek                         | 29 | AD in Final Diagnosis                                 | 10 | 0.27  |
| Rilutek                         | 29 | Locus Ceruleus Pigmentary Incontinence                | 35 | 0.26  |
| Rilutek                         | 29 | Bulbar                                                | 12 | 0.25  |
| Rilutek                         | 29 | Loss of Neurons Locus Ceruleus                        | 6  | -0.24 |
| Rilutek                         | 29 | Hippocampus Neurofibrillary Tangles                   | 17 | 0.22  |
| Rilutek                         | 29 | Frontal Cortex Neurofibrillary Tangles                | 6  | 0.21  |
| Rilutek                         | 29 | Amygdala Neurofibrillary Tangles                      | 20 | 0.20  |
| Rilutek                         | 29 | Loss of Neurons Substantia Nigra                      | 6  | -0.20 |
| Rilutek                         | 29 | Thalamus Neurofibrillary Tangles                      | 7  | 0.19  |
| Rilutek                         | 29 | Entorhinal Cortex Neurofibrillary Tangles             | 28 | 0.17  |
| Rilutek                         | 29 | Diaphragm Atrophy                                     | 25 | 0.17  |
| Rilutek                         | 29 | Diagnostic Delay                                      | 46 | -0.16 |
| Rilutek                         | 29 | Neocortex Neurofibrillary Tangles                     | 2  | 0.16  |
| Rilutek                         | 29 | Substantia Nigra Pigmentary Incontinence              | 32 | -0.16 |
| Rilutek                         | 29 | Anterior Horn Cells Neurofibrillary Tangles           | 2  | 0.15  |
| Rilutek                         | 29 | General Spinal Cord Atrophy                           | 4  | 0.14  |

|         |    |                                                       |    |       |
|---------|----|-------------------------------------------------------|----|-------|
| Rilutek | 29 | Lateral Corticospinal Tract Degeneration              | 41 | -0.13 |
| Rilutek | 29 | NFT (any location)                                    | 36 | 0.13  |
| Rilutek | 29 | Dentate Nucleus of Cerebellum Neurofibrillary Tangles | 1  | -0.13 |
| Rilutek | 29 | Familial ALS                                          | 1  | -0.13 |
| Rilutek | 29 | Infarcts                                              | 1  | -0.13 |
| Rilutek | 29 | Denervation                                           | 31 | -0.12 |
| Rilutek | 29 | Lewy Body Formation                                   | 5  | -0.12 |
| Rilutek | 29 | Basal Ganglia Neurofibrillary Tangles                 | 1  | 0.11  |
| Rilutek | 29 | Caudate Nucleus Neurofibrillary Tangles               | 1  | 0.11  |
| Rilutek | 29 | Loss of Neurons Gyrus                                 | 1  | 0.11  |
| Rilutek | 29 | Occipital Cortex Neurofibrillary Tangles              | 1  | 0.11  |
| Rilutek | 29 | Parietal Cortex Neurofibrillary Tangles               | 1  | 0.11  |
| Rilutek | 29 | Putamen Neurofibrillary Tangles                       | 1  | 0.11  |
| Rilutek | 29 | Loss of Neurons Dentate Nucleus                       | 8  | -0.10 |
| Rilutek | 29 | Lewy Body Disease in Final Diagnosis                  | 2  | -0.10 |
| Rilutek | 29 | Loss of Neurons Spinal Cord                           | 11 | 0.09  |
| Rilutek | 29 | Ventral Nerve Roots Atrophy                           | 30 | 0.09  |
| Rilutek | 29 | Anterior Corticospinal Tract Degeneration             | 33 | -0.09 |
| Rilutek | 29 | Loss of Neurons Anterior Horns                        | 20 | 0.09  |
| Rilutek | 29 | Substantia Nigra Neurofibrillary Tangles              | 6  | 0.07  |
| Rilutek | 29 | Gender (1 = m, 2 = f)                                 | 46 | 0.07  |
| Rilutek | 29 | Tau Pathology/Tauopathy                               | 8  | 0.07  |
| Rilutek | 29 | Loss of Neurons Medulla                               | 15 | 0.07  |
| Rilutek | 29 | Hypothalamus Neurofibrillary Tangles                  | 10 | -0.07 |
| Rilutek | 29 | Paraspinal Muscle Fiber Atrophy                       | 26 | 0.06  |
| Rilutek | 29 | Brain Mass                                            | 46 | 0.06  |
| Rilutek | 29 | Loss Purkinje Cells                                   | 39 | 0.06  |
| Rilutek | 29 | FTD in Final Diagnosis                                | 3  | 0.06  |
| Rilutek | 29 | Microinfarcts                                         | 3  | 0.06  |
| Rilutek | 29 | Insular Cortex Neurofibrillary Tangles                | 10 | -0.06 |
| Rilutek | 29 | Ventricular Dilation                                  | 6  | 0.05  |
| Rilutek | 29 | Locus Ceruleus Neurofibrillary Tangles                | 14 | -0.05 |
| Rilutek | 29 | Betz Cell Loss                                        | 35 | 0.05  |
| Rilutek | 29 | Nucleus Basalis Neurofibrillary Tangles               | 20 | -0.05 |
| Rilutek | 29 | Loss of Neurons Amygdala                              | 2  | -0.04 |
| Rilutek | 29 | Brain Atrophy                                         | 9  | 0.04  |
| Rilutek | 29 | Age of Death                                          | 46 | -0.04 |

|                                          |    |                                           |    |       |
|------------------------------------------|----|-------------------------------------------|----|-------|
| Rilutek                                  | 29 | Temporal Cortex Neurofibrillary Tangles   | 7  | 0.03  |
| Rilutek                                  | 29 | Onset Age                                 | 46 | 0.03  |
| Rilutek                                  | 29 | FTLD in Final Diagnosis                   | 12 | -0.03 |
| Rilutek                                  | 29 | Brain Neuron Loss                         | 38 | -0.03 |
| Rilutek                                  | 29 | Atherosclerosis                           | 16 | 0.02  |
| Rilutek                                  | 29 | Diagnosis Age                             | 46 | 0.01  |
| Rilutek                                  | 29 | TDP-43                                    | 37 | 0.00  |
| Substantia Nigra Neurofibrillary Tangles | 6  | Nucleus Basalis Neurofibrillary Tangles   | 20 | 0.57  |
| Substantia Nigra Neurofibrillary Tangles | 6  | Amygdala Neurofibrillary Tangles          | 20 | 0.46  |
| Substantia Nigra Neurofibrillary Tangles | 6  | Hippocampus Neurofibrillary Tangles       | 17 | 0.37  |
| Substantia Nigra Neurofibrillary Tangles | 6  | Paraspinal Muscle Fiber Atrophy           | 26 | 0.35  |
| Substantia Nigra Neurofibrillary Tangles | 6  | FTD in Final Diagnosis                    | 3  | 0.30  |
| Substantia Nigra Neurofibrillary Tangles | 6  | Locus Ceruleus Pigmentary Incontinence    | 35 | 0.29  |
| Substantia Nigra Neurofibrillary Tangles | 6  | Entorhinal Cortex Neurofibrillary Tangles | 28 | 0.28  |
| Substantia Nigra Neurofibrillary Tangles | 6  | Diaphragm Atrophy                         | 25 | 0.27  |
| Substantia Nigra Neurofibrillary Tangles | 6  | Loss of Neurons Spinal Cord               | 11 | 0.23  |
| Substantia Nigra Neurofibrillary Tangles | 6  | Loss of Neurons Dentate Nucleus           | 8  | 0.23  |
| Substantia Nigra Neurofibrillary Tangles | 6  | Lateral Corticospinal Tract Degeneration  | 41 | -0.21 |
| Substantia Nigra Neurofibrillary Tangles | 6  | Brain Mass                                | 46 | 0.19  |
| Substantia Nigra Neurofibrillary Tangles | 6  | Denervation                               | 31 | 0.14  |
| Substantia Nigra Neurofibrillary Tangles | 6  | Loss of Neurons Amygdala                  | 2  | 0.14  |
| Substantia Nigra Neurofibrillary Tangles | 6  | Loss of Neurons Substantia Nigra          | 6  | -0.14 |
| Substantia Nigra Neurofibrillary Tangles | 6  | Substantia Nigra Pigmentary Incontinence  | 32 | -0.13 |
| Substantia Nigra Neurofibrillary Tangles | 6  | Loss of Neurons Locus Ceruleus            | 6  | -0.13 |
| Substantia Nigra Neurofibrillary Tangles | 6  | Anterior Corticospinal Tract Degeneration | 33 | -0.13 |
| Substantia Nigra Neurofibrillary Tangles | 6  | Lewy Body Formation                       | 5  | -0.12 |
| Substantia Nigra Neurofibrillary Tangles | 6  | AD in Final Diagnosis                     | 10 | 0.11  |

|                                          |    |                                      |    |       |
|------------------------------------------|----|--------------------------------------|----|-------|
| Substantia Nigra Neurofibrillary Tangles | 6  | FTLD in Final Diagnosis              | 12 | 0.10  |
| Substantia Nigra Neurofibrillary Tangles | 6  | Age of Death                         | 46 | 0.10  |
| Substantia Nigra Neurofibrillary Tangles | 6  | Betz Cell Loss                       | 35 | -0.10 |
| Substantia Nigra Neurofibrillary Tangles | 6  | Microinfarcts                        | 3  | -0.10 |
| Substantia Nigra Neurofibrillary Tangles | 6  | Tau Pathology/Tauopathy              | 8  | 0.09  |
| Substantia Nigra Neurofibrillary Tangles | 6  | Onset Age                            | 46 | 0.09  |
| Substantia Nigra Neurofibrillary Tangles | 6  | Diagnosis Age                        | 46 | 0.09  |
| Substantia Nigra Neurofibrillary Tangles | 6  | Loss of Neurons Anterior Horns       | 20 | 0.08  |
| Substantia Nigra Neurofibrillary Tangles | 6  | Lewy Body Disease in Final Diagnosis | 2  | -0.08 |
| Substantia Nigra Neurofibrillary Tangles | 6  | Familial ALS                         | 1  | -0.05 |
| Substantia Nigra Neurofibrillary Tangles | 6  | Infarcts                             | 1  | -0.05 |
| Substantia Nigra Neurofibrillary Tangles | 6  | Loss of Neurons Gyrus                | 1  | -0.05 |
| Substantia Nigra Neurofibrillary Tangles | 6  | Loss Purkinje Cells                  | 39 | 0.05  |
| Substantia Nigra Neurofibrillary Tangles | 6  | Ventral Nerve Roots Atrophy          | 30 | 0.04  |
| Substantia Nigra Neurofibrillary Tangles | 6  | Loss of Neurons Medulla              | 15 | -0.03 |
| Substantia Nigra Neurofibrillary Tangles | 6  | Diagnostic Delay                     | 46 | -0.02 |
| Substantia Nigra Neurofibrillary Tangles | 6  | Gender (1 = m, 2 = f)                | 46 | 0.01  |
| Substantia Nigra Neurofibrillary Tangles | 6  | Disease Duration                     | 46 | -0.01 |
| Substantia Nigra Pigmentary Incontinence | 32 | Loss of Neurons Substantia Nigra     | 6  | 0.62  |
| Substantia Nigra Pigmentary Incontinence | 32 | Loss Purkinje Cells                  | 39 | 0.38  |
| Substantia Nigra Pigmentary Incontinence | 32 | FTLD in Final Diagnosis              | 12 | 0.31  |
| Substantia Nigra Pigmentary Incontinence | 32 | Lewy Body Disease in Final Diagnosis | 2  | 0.22  |
| Substantia Nigra Pigmentary Incontinence | 32 | Loss of Neurons Spinal Cord          | 11 | 0.22  |
| Substantia Nigra Pigmentary Incontinence | 32 | Age of Death                         | 46 | 0.21  |

|                                          |    |                                 |    |       |
|------------------------------------------|----|---------------------------------|----|-------|
| Substantia Nigra Pigmentary Incontinence | 32 | Betz Cell Loss                  | 35 | 0.20  |
| Substantia Nigra Pigmentary Incontinence | 32 | Diagnostic Delay                | 46 | 0.19  |
| Substantia Nigra Pigmentary Incontinence | 32 | Diagnosis Age                   | 46 | 0.18  |
| Substantia Nigra Pigmentary Incontinence | 32 | FTD in Final Diagnosis          | 3  | -0.17 |
| Substantia Nigra Pigmentary Incontinence | 32 | Loss of Neurons Medulla         | 15 | 0.16  |
| Substantia Nigra Pigmentary Incontinence | 32 | Disease Duration                | 46 | 0.15  |
| Substantia Nigra Pigmentary Incontinence | 32 | Onset Age                       | 46 | 0.15  |
| Substantia Nigra Pigmentary Incontinence | 32 | Loss of Neurons Dentate Nucleus | 8  | -0.13 |
| Substantia Nigra Pigmentary Incontinence | 32 | Tau Pathology/Tauopathy         | 8  | 0.13  |
| Substantia Nigra Pigmentary Incontinence | 32 | Loss of Neurons Amygdala        | 2  | -0.08 |
| Substantia Nigra Pigmentary Incontinence | 32 | Paraspinal Muscle Fiber Atrophy | 26 | 0.05  |
| Substantia Nigra Pigmentary Incontinence | 32 | Lewy Body Formation             | 5  | 0.05  |
| Substantia Nigra Pigmentary Incontinence | 32 | Loss of Neurons Anterior Horns  | 20 | 0.04  |
| Substantia Nigra Pigmentary Incontinence | 32 | Loss of Neurons Locus Ceruleus  | 6  | 0.03  |
| Substantia Nigra Pigmentary Incontinence | 32 | Brain Mass                      | 46 | 0.03  |
| Substantia Nigra Pigmentary Incontinence | 32 | Ventral Nerve Roots Atrophy     | 30 | 0.03  |
| Substantia Nigra Pigmentary Incontinence | 32 | Diaphragm Atrophy               | 25 | 0.02  |
| Substantia Nigra Pigmentary Incontinence | 32 | Gender (1 = m, 2 = f)           | 46 | 0.02  |
| Substantia Nigra Pigmentary Incontinence | 32 | AD in Final Diagnosis           | 10 | 0.01  |
| Substantia Nigra Pigmentary Incontinence | 32 | Microinfarcts                   | 3  | 0.01  |
| Substantia Nigra Pigmentary Incontinence | 32 | Denervation                     | 31 | 0.00  |
| Substantia Nigra Pigmentary Incontinence | 32 | Familial ALS                    | 1  | 0.00  |
| Substantia Nigra Pigmentary Incontinence | 32 | Infarcts                        | 1  | 0.00  |
| Substantia Nigra Pigmentary Incontinence | 32 | Loss of Neurons Gyrus           | 1  | 0.00  |

|                         |    |                                                       |    |       |
|-------------------------|----|-------------------------------------------------------|----|-------|
| Tau Pathology/Tauopathy | 8  | Gender (1 = m, 2 = f)                                 | 46 | -0.35 |
| Tau Pathology/Tauopathy | 8  | Brain Mass                                            | 46 | 0.21  |
| Tau Pathology/Tauopathy | 8  | Lewy Body Disease in Final Diagnosis                  | 2  | 0.18  |
| Tau Pathology/Tauopathy | 8  | Onset Age                                             | 46 | -0.16 |
| Tau Pathology/Tauopathy | 8  | Diagnosis Age                                         | 46 | -0.16 |
| Tau Pathology/Tauopathy | 8  | Age of Death                                          | 46 | -0.15 |
| Tau Pathology/Tauopathy | 8  | FTLD in Final Diagnosis                               | 12 | -0.14 |
| Tau Pathology/Tauopathy | 8  | FTD in Final Diagnosis                                | 3  | 0.11  |
| Tau Pathology/Tauopathy | 8  | Microinfarcts                                         | 3  | 0.11  |
| Tau Pathology/Tauopathy | 8  | Disease Duration                                      | 46 | 0.11  |
| Tau Pathology/Tauopathy | 8  | AD in Final Diagnosis                                 | 10 | -0.10 |
| Tau Pathology/Tauopathy | 8  | Infarcts                                              | 1  | -0.07 |
| Tau Pathology/Tauopathy | 8  | Diagnostic Delay                                      | 46 | 0.03  |
| TDP-43                  | 37 | Loss Purkinje Cells                                   | 39 | 0.52  |
| TDP-43                  | 37 | FTLD in Final Diagnosis                               | 12 | 0.46  |
| TDP-43                  | 37 | Entorhinal Cortex Neurofibrillary Tangles             | 28 | 0.35  |
| TDP-43                  | 37 | Ventral Nerve Roots Atrophy                           | 30 | 0.35  |
| TDP-43                  | 37 | FTD in Final Diagnosis                                | 3  | -0.34 |
| TDP-43                  | 37 | Nucleus Basalis Neurofibrillary Tangles               | 20 | 0.31  |
| TDP-43                  | 37 | Betz Cell Loss                                        | 35 | 0.28  |
| TDP-43                  | 37 | Insular Cortex Neurofibrillary Tangles                | 10 | 0.28  |
| TDP-43                  | 37 | Loss of Neurons Dentate Nucleus                       | 8  | 0.26  |
| TDP-43                  | 37 | Frontal Cortex Neurofibrillary Tangles                | 6  | 0.25  |
| TDP-43                  | 37 | Hypothalamus Neurofibrillary Tangles                  | 10 | 0.25  |
| TDP-43                  | 37 | Familial ALS                                          | 1  | -0.24 |
| TDP-43                  | 37 | Temporal Cortex Neurofibrillary Tangles               | 7  | 0.24  |
| TDP-43                  | 37 | Cingulate Cortex Neurofibrillary Tangles              | 2  | 0.23  |
| TDP-43                  | 37 | Locus Ceruleus Pigmentary Incontinence                | 35 | 0.21  |
| TDP-43                  | 37 | Denervation                                           | 31 | 0.21  |
| TDP-43                  | 37 | Dentate Nucleus of Cerebellum Neurofibrillary Tangles | 1  | 0.20  |
| TDP-43                  | 37 | Microinfarcts                                         | 3  | 0.18  |
| TDP-43                  | 37 | Parietal Cortex Neurofibrillary Tangles               | 1  | -0.17 |
| TDP-43                  | 37 | Loss of Neurons Medulla                               | 15 | 0.17  |
| TDP-43                  | 37 | Loss of Neurons Amygdala                              | 2  | 0.16  |
| TDP-43                  | 37 | Thalamus Neurofibrillary Tangles                      | 7  | 0.15  |
| TDP-43                  | 37 | Substantia Nigra Pigmentary Incontinence              | 32 | 0.15  |
| TDP-43                  | 37 | Hippocampus Neurofibrillary Tangles                   | 17 | 0.14  |

|                                         |    |                                             |    |       |
|-----------------------------------------|----|---------------------------------------------|----|-------|
| TDP-43                                  | 37 | Neocortex Neurofibrillary Tangles           | 2  | -0.14 |
| TDP-43                                  | 37 | Anterior Corticospinal Tract Degeneration   | 33 | 0.13  |
| TDP-43                                  | 37 | Anterior Horn Cells Neurofibrillary Tangles | 2  | -0.13 |
| TDP-43                                  | 37 | AD in Final Diagnosis                       | 10 | -0.13 |
| TDP-43                                  | 37 | Locus Ceruleus Neurofibrillary Tangles      | 14 | 0.11  |
| TDP-43                                  | 37 | Amygdala Neurofibrillary Tangles            | 20 | 0.11  |
| TDP-43                                  | 37 | Age of Death                                | 46 | 0.10  |
| TDP-43                                  | 37 | Loss of Neurons Substantia Nigra            | 6  | -0.10 |
| TDP-43                                  | 37 | Loss of Neurons Anterior Horns              | 20 | 0.10  |
| TDP-43                                  | 37 | Basal Ganglia Neurofibrillary Tangles       | 1  | -0.10 |
| TDP-43                                  | 37 | Occipital Cortex Neurofibrillary Tangles    | 1  | -0.10 |
| TDP-43                                  | 37 | Loss of Neurons Spinal Cord                 | 11 | 0.09  |
| TDP-43                                  | 37 | Diagnosis Age                               | 46 | 0.09  |
| TDP-43                                  | 37 | Lewy Body Formation                         | 5  | -0.09 |
| TDP-43                                  | 37 | Substantia Nigra Neurofibrillary Tangles    | 6  | 0.09  |
| TDP-43                                  | 37 | Onset Age                                   | 46 | 0.08  |
| TDP-43                                  | 37 | Lewy Body Disease in Final Diagnosis        | 2  | 0.08  |
| TDP-43                                  | 37 | Disease Duration                            | 46 | 0.06  |
| TDP-43                                  | 37 | Diagnostic Delay                            | 46 | 0.06  |
| TDP-43                                  | 37 | Caudate Nucleus Neurofibrillary Tangles     | 1  | 0.05  |
| TDP-43                                  | 37 | Loss of Neurons Gyrus                       | 1  | 0.05  |
| TDP-43                                  | 37 | Putamen Neurofibrillary Tangles             | 1  | 0.05  |
| TDP-43                                  | 37 | Infarcts                                    | 1  | 0.05  |
| TDP-43                                  | 37 | Paraspinal Muscle Fiber Atrophy             | 26 | 0.05  |
| TDP-43                                  | 37 | Gender (1 = m, 2 = f)                       | 46 | 0.05  |
| TDP-43                                  | 37 | Brain Mass                                  | 46 | 0.04  |
| TDP-43                                  | 37 | Tau Pathology/Tauopathy                     | 8  | 0.02  |
| TDP-43                                  | 37 | Loss of Neurons Locus Ceruleus              | 6  | -0.02 |
| TDP-43                                  | 37 | Lateral Corticospinal Tract Degeneration    | 41 | -0.02 |
| TDP-43                                  | 37 | Diaphragm Atrophy                           | 25 | 0.01  |
| Temporal Cortex Neurofibrillary Tangles | 7  | Loss of Neurons Dentate Nucleus             | 8  | 0.39  |
| Temporal Cortex Neurofibrillary Tangles | 7  | FTLD in Final Diagnosis                     | 12 | 0.34  |
| Temporal Cortex Neurofibrillary Tangles | 7  | Frontal Cortex Neurofibrillary Tangles      | 6  | 0.32  |
| Temporal Cortex Neurofibrillary Tangles | 7  | Substantia Nigra Neurofibrillary Tangles    | 6  | 0.30  |
| Temporal Cortex Neurofibrillary Tangles | 7  | Loss of Neurons Medulla                     | 15 | 0.26  |

|                                         |   |                                           |    |       |
|-----------------------------------------|---|-------------------------------------------|----|-------|
| Temporal Cortex Neurofibrillary Tangles | 7 | Nucleus Basalis Neurofibrillary Tangles   | 20 | 0.26  |
| Temporal Cortex Neurofibrillary Tangles | 7 | Amygdala Neurofibrillary Tangles          | 20 | 0.25  |
| Temporal Cortex Neurofibrillary Tangles | 7 | Substantia Nigra Pigmentary Incontinence  | 32 | -0.23 |
| Temporal Cortex Neurofibrillary Tangles | 7 | Loss of Neurons Amygdala                  | 2  | 0.22  |
| Temporal Cortex Neurofibrillary Tangles | 7 | Hippocampus Neurofibrillary Tangles       | 17 | 0.22  |
| Temporal Cortex Neurofibrillary Tangles | 7 | Lewy Body Formation                       | 5  | 0.22  |
| Temporal Cortex Neurofibrillary Tangles | 7 | Loss Purkinje Cells                       | 39 | 0.20  |
| Temporal Cortex Neurofibrillary Tangles | 7 | Locus Ceruleus Neurofibrillary Tangles    | 14 | 0.19  |
| Temporal Cortex Neurofibrillary Tangles | 7 | Tau Pathology/Tauopathy                   | 8  | -0.17 |
| Temporal Cortex Neurofibrillary Tangles | 7 | Loss of Neurons Substantia Nigra          | 6  | -0.14 |
| Temporal Cortex Neurofibrillary Tangles | 7 | Loss of Neurons Locus Ceruleus            | 6  | -0.13 |
| Temporal Cortex Neurofibrillary Tangles | 7 | Entorhinal Cortex Neurofibrillary Tangles | 28 | 0.12  |
| Temporal Cortex Neurofibrillary Tangles | 7 | Loss of Neurons Anterior Horns            | 20 | 0.11  |
| Temporal Cortex Neurofibrillary Tangles | 7 | Loss of Neurons Spinal Cord               | 11 | 0.11  |
| Temporal Cortex Neurofibrillary Tangles | 7 | Brain Mass                                | 46 | -0.10 |
| Temporal Cortex Neurofibrillary Tangles | 7 | FTD in Final Diagnosis                    | 3  | -0.10 |
| Temporal Cortex Neurofibrillary Tangles | 7 | Diaphragm Atrophy                         | 25 | 0.09  |
| Temporal Cortex Neurofibrillary Tangles | 7 | Denervation                               | 31 | 0.08  |
| Temporal Cortex Neurofibrillary Tangles | 7 | Lewy Body Disease in Final Diagnosis      | 2  | -0.08 |
| Temporal Cortex Neurofibrillary Tangles | 7 | Lateral Corticospinal Tract Degeneration  | 41 | -0.06 |
| Temporal Cortex Neurofibrillary Tangles | 7 | Ventral Nerve Roots Atrophy               | 30 | 0.06  |
| Temporal Cortex Neurofibrillary Tangles | 7 | Age of Death                              | 46 | 0.06  |
| Temporal Cortex Neurofibrillary Tangles | 7 | Paraspinal Muscle Fiber Atrophy           | 26 | 0.06  |
| Temporal Cortex Neurofibrillary Tangles | 7 | Locus Ceruleus Pigmentary Incontinence    | 35 | 0.06  |



|                                         |   |                                           |    |       |
|-----------------------------------------|---|-------------------------------------------|----|-------|
| Temporal Cortex Neurofibrillary Tangles | 7 | Loss of Neurons Gyrus                     | 1  | -0.05 |
| Temporal Cortex Neurofibrillary Tangles | 7 | Familial ALS                              | 1  | -0.05 |
| Temporal Cortex Neurofibrillary Tangles | 7 | Infarcts                                  | 1  | -0.05 |
| Temporal Cortex Neurofibrillary Tangles | 7 | Disease Duration                          | 46 | 0.05  |
| Temporal Cortex Neurofibrillary Tangles | 7 | Onset Age                                 | 46 | 0.04  |
| Temporal Cortex Neurofibrillary Tangles | 7 | Diagnostic Delay                          | 46 | -0.04 |
| Temporal Cortex Neurofibrillary Tangles | 7 | Diagnosis Age                             | 46 | 0.04  |
| Temporal Cortex Neurofibrillary Tangles | 7 | Gender (1 = m, 2 = f)                     | 46 | -0.03 |
| Temporal Cortex Neurofibrillary Tangles | 7 | AD in Final Diagnosis                     | 10 | 0.02  |
| Temporal Cortex Neurofibrillary Tangles | 7 | Anterior Corticospinal Tract Degeneration | 33 | -0.02 |
| Temporal Cortex Neurofibrillary Tangles | 7 | Microinfarcts                             | 3  | -0.01 |
| Temporal Cortex Neurofibrillary Tangles | 7 | Betz Cell Loss                            | 35 | 0.00  |
| Thalamus Neurofibrillary Tangles        | 7 | Nucleus Basalis Neurofibrillary Tangles   | 20 | 0.62  |
| Thalamus Neurofibrillary Tangles        | 7 | Substantia Nigra Neurofibrillary Tangles  | 6  | 0.48  |
| Thalamus Neurofibrillary Tangles        | 7 | Entorhinal Cortex Neurofibrillary Tangles | 28 | 0.46  |
| Thalamus Neurofibrillary Tangles        | 7 | Amygdala Neurofibrillary Tangles          | 20 | 0.37  |
| Thalamus Neurofibrillary Tangles        | 7 | Insular Cortex Neurofibrillary Tangles    | 10 | 0.33  |
| Thalamus Neurofibrillary Tangles        | 7 | Tau Pathology/Tauopathy                   | 8  | 0.30  |
| Thalamus Neurofibrillary Tangles        | 7 | Locus Ceruleus Neurofibrillary Tangles    | 14 | 0.30  |
| Thalamus Neurofibrillary Tangles        | 7 | Hippocampus Neurofibrillary Tangles       | 17 | 0.29  |
| Thalamus Neurofibrillary Tangles        | 7 | Microinfarcts                             | 3  | 0.26  |
| Thalamus Neurofibrillary Tangles        | 7 | AD in Final Diagnosis                     | 10 | 0.26  |
| Thalamus Neurofibrillary Tangles        | 7 | Onset Age                                 | 46 | 0.26  |
| Thalamus Neurofibrillary Tangles        | 7 | Diagnosis Age                             | 46 | 0.25  |

|                                  |   |                                           |    |       |
|----------------------------------|---|-------------------------------------------|----|-------|
| Thalamus Neurofibrillary Tangles | 7 | Lewy Body Disease in Final Diagnosis      | 2  | 0.25  |
| Thalamus Neurofibrillary Tangles | 7 | Age of Death                              | 46 | 0.25  |
| Thalamus Neurofibrillary Tangles | 7 | Loss of Neurons Anterior Horns            | 20 | -0.21 |
| Thalamus Neurofibrillary Tangles | 7 | Locus Ceruleus Pigmentary Incontinence    | 35 | 0.19  |
| Thalamus Neurofibrillary Tangles | 7 | Loss of Neurons Dentate Nucleus           | 8  | -0.18 |
| Thalamus Neurofibrillary Tangles | 7 | Substantia Nigra Pigmentary Incontinence  | 32 | -0.16 |
| Thalamus Neurofibrillary Tangles | 7 | Ventral Nerve Roots Atrophy               | 30 | 0.16  |
| Thalamus Neurofibrillary Tangles | 7 | Disease Duration                          | 46 | -0.16 |
| Thalamus Neurofibrillary Tangles | 7 | Loss of Neurons Substantia Nigra          | 6  | -0.15 |
| Thalamus Neurofibrillary Tangles | 7 | Loss of Neurons Locus Ceruleus            | 6  | -0.15 |
| Thalamus Neurofibrillary Tangles | 7 | Brain Mass                                | 46 | 0.14  |
| Thalamus Neurofibrillary Tangles | 7 | Frontal Cortex Neurofibrillary Tangles    | 6  | 0.13  |
| Thalamus Neurofibrillary Tangles | 7 | Lewy Body Formation                       | 5  | 0.13  |
| Thalamus Neurofibrillary Tangles | 7 | Loss of Neurons Spinal Cord               | 11 | 0.13  |
| Thalamus Neurofibrillary Tangles | 7 | Temporal Cortex Neurofibrillary Tangles   | 7  | -0.12 |
| Thalamus Neurofibrillary Tangles | 7 | Gender (1 = m, 2 = f)                     | 46 | -0.12 |
| Thalamus Neurofibrillary Tangles | 7 | Loss Purkinje Cells                       | 39 | -0.10 |
| Thalamus Neurofibrillary Tangles | 7 | Loss of Neurons Medulla                   | 15 | -0.10 |
| Thalamus Neurofibrillary Tangles | 7 | Anterior Corticospinal Tract Degeneration | 33 | 0.09  |
| Thalamus Neurofibrillary Tangles | 7 | Loss of Neurons Amygdala                  | 2  | -0.08 |
| Thalamus Neurofibrillary Tangles | 7 | FTD in Final Diagnosis                    | 3  | 0.08  |
| Thalamus Neurofibrillary Tangles | 7 | Diagnostic Delay                          | 46 | -0.08 |
| Thalamus Neurofibrillary Tangles | 7 | Paraspinal Muscle Fiber Atrophy           | 26 | 0.07  |
| Thalamus Neurofibrillary Tangles | 7 | Denervation                               | 31 | 0.07  |

|                                  |    |                                                       |    |       |
|----------------------------------|----|-------------------------------------------------------|----|-------|
| Thalamus Neurofibrillary Tangles | 7  | Lateral Corticospinal Tract Degeneration              | 41 | 0.06  |
| Thalamus Neurofibrillary Tangles | 7  | Loss of Neurons Gyrus                                 | 1  | -0.06 |
| Thalamus Neurofibrillary Tangles | 7  | Familial ALS                                          | 1  | -0.06 |
| Thalamus Neurofibrillary Tangles | 7  | Parietal Cortex Neurofibrillary Tangles               | 1  | -0.06 |
| Thalamus Neurofibrillary Tangles | 7  | Infarcts                                              | 1  | -0.06 |
| Thalamus Neurofibrillary Tangles | 7  | Betz Cell Loss                                        | 35 | 0.02  |
| Thalamus Neurofibrillary Tangles | 7  | FTLD in Final Diagnosis                               | 12 | 0.00  |
| Thalamus Neurofibrillary Tangles | 7  | Diaphragm Atrophy                                     | 25 | 0.00  |
| Upper limb                       | 17 | Limb                                                  | 30 | 0.64  |
| Upper limb                       | 17 | Frontal Cortex Neurofibrillary Tangles                | 6  | 0.33  |
| Upper limb                       | 17 | Loss of Neurons Substantia Nigra                      | 6  | -0.27 |
| Upper limb                       | 17 | Diaphragm Atrophy                                     | 25 | 0.26  |
| Upper limb                       | 17 | Cingulate Cortex Neurofibrillary Tangles              | 2  | -0.25 |
| Upper limb                       | 17 | Loss of Neurons Anterior Horns                        | 20 | 0.24  |
| Upper limb                       | 17 | Ventral Root Atrophy                                  | 30 | 0.22  |
| Upper limb                       | 17 | Dentate Nucleus of Cerebellum Neurofibrillary Tangles | 1  | 0.19  |
| Upper limb                       | 17 | Familial ALS                                          | 1  | 0.19  |
| Upper limb                       | 17 | Occipital Cortex Neurofibrillary Tangles              | 1  | 0.19  |
| Upper limb                       | 17 | Parietal Cortex Neurofibrillary Tangles               | 1  | 0.19  |
| Upper limb                       | 17 | Brain Mass                                            | 46 | 0.18  |
| Upper limb                       | 17 | Hippocampus Neurofibrillary Tangles                   | 17 | -0.18 |
| Upper limb                       | 17 | Locus Ceruleus Neurofibrillary Tangles                | 14 | 0.17  |
| Upper limb                       | 17 | General Spinal Cord Atrophy                           | 4  | -0.17 |
| Upper limb                       | 17 | Locus Ceruleus Pigmentary Incontinence                | 35 | 0.16  |
| Upper limb                       | 17 | Bulbar                                                | 12 | -0.15 |
| Upper limb                       | 17 | Insular Cortex Neurofibrillary Tangles                | 10 | -0.15 |
| Upper limb                       | 17 | FTD in Final Diagnosis                                | 3  | -0.13 |
| Upper limb                       | 17 | Microinfarcts                                         | 3  | -0.13 |
| Upper limb                       | 17 | Lewy Body Formation                                   | 5  | -0.13 |
| Upper limb                       | 17 | Thalamus Neurofibrillary Tangles                      | 7  | -0.12 |
| Upper limb                       | 17 | Lateral Corticospinal Tract Degeneration              | 41 | -0.11 |

|            |    |                                             |    |       |
|------------|----|---------------------------------------------|----|-------|
| Upper limb | 17 | TDP-43                                      | 37 | 0.11  |
| Upper limb | 17 | Loss of Neurons Spinal Cord                 | 11 | 0.11  |
| Upper limb | 17 | Denervation                                 | 31 | 0.11  |
| Upper limb | 17 | Lower Limb                                  | 13 | 0.10  |
| Upper limb | 17 | Ventral Nerve Roots Atrophy                 | 30 | 0.10  |
| Upper limb | 17 | Anterior Corticospinal Tract Degeneration   | 33 | -0.09 |
| Upper limb | 17 | Nucleus Basalis Neurofibrillary Tangles     | 20 | -0.09 |
| Upper limb | 17 | Amygdala Neurofibrillary Tangles            | 20 | 0.09  |
| Upper limb | 17 | Entorhinal Cortex Neurofibrillary Tangles   | 28 | -0.09 |
| Upper limb | 17 | Age of Death                                | 46 | -0.09 |
| Upper limb | 17 | Disease Duration                            | 46 | -0.08 |
| Upper limb | 17 | Brain Neuron Loss                           | 38 | 0.08  |
| Upper limb | 17 | Substantia Nigra Neurofibrillary Tangles    | 6  | -0.08 |
| Upper limb | 17 | Tau Pathology/Tauopathy                     | 8  | 0.07  |
| Upper limb | 17 | Infarcts                                    | 1  | -0.07 |
| Upper limb | 17 | Basal Ganglia Neurofibrillary Tangles       | 1  | -0.07 |
| Upper limb | 17 | Caudate Nucleus Neurofibrillary Tangles     | 1  | -0.07 |
| Upper limb | 17 | Loss of Neurons Gyrus                       | 1  | -0.07 |
| Upper limb | 17 | Putamen Neurofibrillary Tangles             | 1  | -0.07 |
| Upper limb | 17 | Hypothalamus Neurofibrillary Tangles        | 10 | 0.07  |
| Upper limb | 17 | Loss of Neurons Locus Ceruleus              | 6  | -0.07 |
| Upper limb | 17 | Substantia Nigra Pigmentary Incontinence    | 32 | -0.07 |
| Upper limb | 17 | AD in Final Diagnosis                       | 10 | 0.06  |
| Upper limb | 17 | Loss Purkinje Cells                         | 39 | 0.06  |
| Upper limb | 17 | Loss of Neurons Dentate Nucleus             | 8  | -0.06 |
| Upper limb | 17 | Neocortex Neurofibrillary Tangles           | 2  | 0.06  |
| Upper limb | 17 | Onset Age                                   | 46 | -0.06 |
| Upper limb | 17 | Brain Atrophy                               | 9  | 0.06  |
| Upper limb | 17 | Diagnosis Age                               | 46 | -0.06 |
| Upper limb | 17 | Paraspinal Muscle Fiber Atrophy             | 26 | 0.05  |
| Upper limb | 17 | Loss of Neurons Amygdala                    | 2  | 0.04  |
| Upper limb | 17 | FTLD in Final Diagnosis                     | 12 | -0.03 |
| Upper limb | 17 | Betz Cell Loss                              | 35 | -0.03 |
| Upper limb | 17 | Atherosclerosis                             | 16 | -0.03 |
| Upper limb | 17 | Ventricular Dilation                        | 6  | 0.02  |
| Upper limb | 17 | Anterior Horn Cells Neurofibrillary Tangles | 2  | 0.02  |
| Upper limb | 17 | Loss of Neurons Medulla                     | 15 | 0.02  |
| Upper limb | 17 | Diagnostic Delay                            | 46 | 0.02  |
| Upper limb | 17 | Gender (1 = m, 2 = f)                       | 46 | 0.02  |
| Upper limb | 17 | Lewy Body Disease in Final                  | 2  | -0.01 |

|                             |    | Diagnosis                               |    |       |
|-----------------------------|----|-----------------------------------------|----|-------|
| Upper limb                  | 17 | NFT (any location)                      | 36 | -0.01 |
| Upper limb                  | 17 | Temporal Cortex Neurofibrillary Tangles | 7  | 0.00  |
| Ventral Nerve Roots Atrophy | 30 | AD in Final Diagnosis                   | 10 | 0.31  |
| Ventral Nerve Roots Atrophy | 30 | Age of Death                            | 46 | 0.27  |
| Ventral Nerve Roots Atrophy | 30 | Loss of Neurons Anterior Horns          | 20 | 0.26  |
| Ventral Nerve Roots Atrophy | 30 | Loss of Neurons Spinal Cord             | 11 | 0.24  |
| Ventral Nerve Roots Atrophy | 30 | Onset Age                               | 46 | 0.24  |
| Ventral Nerve Roots Atrophy | 30 | Diagnosis Age                           | 46 | 0.23  |
| Ventral Nerve Roots Atrophy | 30 | Denervation                             | 31 | 0.22  |
| Ventral Nerve Roots Atrophy | 30 | Familial ALS                            | 1  | -0.19 |
| Ventral Nerve Roots Atrophy | 30 | Brain Mass                              | 46 | -0.16 |
| Ventral Nerve Roots Atrophy | 30 | FTD in Final Diagnosis                  | 3  | -0.15 |
| Ventral Nerve Roots Atrophy | 30 | Loss of Neurons Amygdala                | 2  | 0.15  |
| Ventral Nerve Roots Atrophy | 30 | Tau Pathology/Tauopathy                 | 8  | 0.15  |
| Ventral Nerve Roots Atrophy | 30 | FTLD in Final Diagnosis                 | 12 | 0.14  |
| Ventral Nerve Roots Atrophy | 30 | Infarcts                                | 1  | 0.11  |
| Ventral Nerve Roots Atrophy | 30 | Loss of Neurons Locus Ceruleus          | 6  | -0.10 |
| Ventral Nerve Roots Atrophy | 30 | Loss of Neurons Substantia Nigra        | 6  | -0.09 |
| Ventral Nerve Roots Atrophy | 30 | Loss of Neurons Gyrus                   | 1  | -0.09 |
| Ventral Nerve Roots Atrophy | 30 | Loss of Neurons Dentate Nucleus         | 8  | -0.07 |
| Ventral Nerve Roots Atrophy | 30 | Diagnostic Delay                        | 46 | -0.07 |
| Ventral Nerve Roots Atrophy | 30 | Loss of Neurons Medulla                 | 15 | -0.06 |
| Ventral Nerve Roots Atrophy | 30 | Lewy Body Disease in Final Diagnosis    | 2  | -0.05 |
| Ventral Nerve Roots Atrophy | 30 | Gender (1 = m, 2 = f)                   | 46 | -0.03 |

|                             |    |                                                       |    |       |
|-----------------------------|----|-------------------------------------------------------|----|-------|
| Ventral Nerve Roots Atrophy | 30 | Disease Duration                                      | 46 | 0.02  |
| Ventral Nerve Roots Atrophy | 30 | Microinfarcts                                         | 3  | 0.02  |
| Ventral Root Atrophy        | 30 | TDP-43                                                | 37 | 0.40  |
| Ventral Root Atrophy        | 30 | Ventral Nerve Roots Atrophy                           | 30 | 0.33  |
| Ventral Root Atrophy        | 30 | Diaphragm Atrophy                                     | 25 | 0.32  |
| Ventral Root Atrophy        | 30 | Paraspinal Muscle Fiber Atrophy                       | 26 | 0.32  |
| Ventral Root Atrophy        | 30 | Frontal Cortex Neurofibrillary Tangles                | 6  | 0.29  |
| Ventral Root Atrophy        | 30 | Denervation                                           | 31 | 0.29  |
| Ventral Root Atrophy        | 30 | Anterior Horn Cells Neurofibrillary Tangles           | 2  | -0.27 |
| Ventral Root Atrophy        | 30 | Temporal Cortex Neurofibrillary Tangles               | 7  | 0.25  |
| Ventral Root Atrophy        | 30 | Betz Cell Loss                                        | 35 | 0.23  |
| Ventral Root Atrophy        | 30 | Diagnostic Delay                                      | 46 | -0.23 |
| Ventral Root Atrophy        | 30 | Atherosclerosis                                       | 16 | 0.21  |
| Ventral Root Atrophy        | 30 | Dentate Nucleus of Cerebellum Neurofibrillary Tangles | 1  | -0.20 |
| Ventral Root Atrophy        | 30 | Familial ALS                                          | 1  | -0.20 |
| Ventral Root Atrophy        | 30 | FTLD in Final Diagnosis                               | 12 | 0.19  |
| Ventral Root Atrophy        | 30 | Tau Pathology/Tauopathy                               | 8  | 0.19  |
| Ventral Root Atrophy        | 30 | Loss of Neurons Amygdala                              | 2  | 0.18  |
| Ventral Root Atrophy        | 30 | Loss of Neurons Anterior Horns                        | 20 | 0.17  |
| Ventral Root Atrophy        | 30 | Loss of Neurons Substantia Nigra                      | 6  | -0.17 |
| Ventral Root Atrophy        | 30 | Hypothalamus Neurofibrillary Tangles                  | 10 | -0.16 |
| Ventral Root Atrophy        | 30 | Thalamus Neurofibrillary Tangles                      | 7  | -0.14 |
| Ventral Root Atrophy        | 30 | Brain Mass                                            | 46 | -0.14 |
| Ventral Root Atrophy        | 30 | Cingulate Cortex Neurofibrillary Tangles              | 2  | 0.13  |
| Ventral Root Atrophy        | 30 | Substantia Nigra Pigmentary Incontinence              | 32 | -0.13 |
| Ventral Root Atrophy        | 30 | Parietal Cortex Neurofibrillary Tangles               | 1  | 0.13  |
| Ventral Root Atrophy        | 30 | Infarcts                                              | 1  | 0.13  |
| Ventral Root Atrophy        | 30 | Loss of Neurons Gyrus                                 | 1  | 0.13  |
| Ventral Root Atrophy        | 30 | Occipital Cortex Neurofibrillary Tangles              | 1  | 0.13  |
| Ventral Root Atrophy        | 30 | Ventricular Dilation                                  | 6  | 0.12  |
| Ventral Root Atrophy        | 30 | AD in Final Diagnosis                                 | 10 | -0.12 |
| Ventral Root Atrophy        | 30 | Amygdala Neurofibrillary Tangles                      | 20 | -0.11 |
| Ventral Root Atrophy        | 30 | Disease Duration                                      | 46 | -0.10 |
| Ventral Root Atrophy        | 30 | Neocortex Neurofibrillary Tangles                     | 2  | 0.10  |
| Ventral Root Atrophy        | 30 | Loss of Neurons Locus Ceruleus                        | 6  | -0.09 |
| Ventral Root Atrophy        | 30 | General Spinal Cord Atrophy                           | 4  | -0.08 |
| Ventral Root Atrophy        | 30 | Loss of Neurons Medulla                               | 15 | -0.08 |
| Ventral Root Atrophy        | 30 | Loss Purkinje Cells                                   | 39 | 0.08  |

|                      |    |                                           |    |       |
|----------------------|----|-------------------------------------------|----|-------|
| Ventral Root Atrophy | 30 | Lewy Body Formation                       | 5  | -0.07 |
| Ventral Root Atrophy | 30 | Lateral Corticospinal Tract Degeneration  | 41 | -0.07 |
| Ventral Root Atrophy | 30 | Loss of Neurons Dentate Nucleus           | 8  | -0.07 |
| Ventral Root Atrophy | 30 | Nucleus Basalis Neurofibrillary Tangles   | 20 | -0.06 |
| Ventral Root Atrophy | 30 | Hippocampus Neurofibrillary Tangles       | 17 | -0.06 |
| Ventral Root Atrophy | 30 | Substantia Nigra Neurofibrillary Tangles  | 6  | -0.06 |
| Ventral Root Atrophy | 30 | Lewy Body Disease in Final Diagnosis      | 2  | -0.05 |
| Ventral Root Atrophy | 30 | Diagnosis Age                             | 46 | -0.05 |
| Ventral Root Atrophy | 30 | Locus Ceruleus Pigmentary Incontinence    | 35 | 0.05  |
| Ventral Root Atrophy | 30 | Age of Death                              | 46 | -0.04 |
| Ventral Root Atrophy | 30 | Microinfarcts                             | 3  | 0.04  |
| Ventral Root Atrophy | 30 | Insular Cortex Neurofibrillary Tangles    | 10 | 0.04  |
| Ventral Root Atrophy | 30 | Anterior Corticospinal Tract Degeneration | 33 | -0.03 |
| Ventral Root Atrophy | 30 | FTD in Final Diagnosis                    | 3  | -0.03 |
| Ventral Root Atrophy | 30 | Gender (1 = m, 2 = f)                     | 46 | -0.02 |
| Ventral Root Atrophy | 30 | Basal Ganglia Neurofibrillary Tangles     | 1  | 0.02  |
| Ventral Root Atrophy | 30 | Caudate Nucleus Neurofibrillary Tangles   | 1  | 0.02  |
| Ventral Root Atrophy | 30 | Putamen Neurofibrillary Tangles           | 1  | 0.02  |
| Ventral Root Atrophy | 30 | Onset Age                                 | 46 | -0.02 |
| Ventral Root Atrophy | 30 | Loss of Neurons Spinal Cord               | 11 | -0.02 |
| Ventral Root Atrophy | 30 | Brain Atrophy                             | 9  | -0.01 |
| Ventral Root Atrophy | 30 | Locus Ceruleus Neurofibrillary Tangles    | 14 | 0.00  |
| Ventral Root Atrophy | 30 | Entorhinal Cortex Neurofibrillary Tangles | 28 | 0.00  |
| Ventricular Dilation | 6  | Caudate Nucleus Neurofibrillary Tangles   | 1  | 0.57  |
| Ventricular Dilation | 6  | Putamen Neurofibrillary Tangles           | 1  | 0.57  |
| Ventricular Dilation | 6  | Atherosclerosis                           | 16 | 0.42  |
| Ventricular Dilation | 6  | Thalamus Neurofibrillary Tangles          | 7  | 0.38  |
| Ventricular Dilation | 6  | Age of Death                              | 46 | 0.37  |
| Ventricular Dilation | 6  | Brain Atrophy                             | 9  | 0.36  |
| Ventricular Dilation | 6  | Onset Age                                 | 46 | 0.35  |
| Ventricular Dilation | 6  | Diagnosis Age                             | 46 | 0.34  |
| Ventricular Dilation | 6  | TDP-43                                    | 37 | 0.31  |
| Ventricular Dilation | 6  | FTLD in Final Diagnosis                   | 12 | 0.30  |
| Ventricular Dilation | 6  | Microinfarcts                             | 3  | 0.27  |
| Ventricular Dilation | 6  | Entorhinal Cortex Neurofibrillary Tangles | 28 | 0.26  |
| Ventricular Dilation | 6  | AD in Final Diagnosis                     | 10 | 0.25  |

|                      |   |                                                       |    |       |
|----------------------|---|-------------------------------------------------------|----|-------|
| Ventricular Dilation | 6 | Ventral Nerve Roots Atrophy                           | 30 | 0.23  |
| Ventricular Dilation | 6 | Lateral Corticospinal Tract Degeneration              | 41 | -0.20 |
| Ventricular Dilation | 6 | Hypothalamus Neurofibrillary Tangles                  | 10 | 0.20  |
| Ventricular Dilation | 6 | Anterior Corticospinal Tract Degeneration             | 33 | -0.19 |
| Ventricular Dilation | 6 | Tau Pathology/Tauopathy                               | 8  | -0.17 |
| Ventricular Dilation | 6 | Nucleus Basalis Neurofibrillary Tangles               | 20 | 0.16  |
| Ventricular Dilation | 6 | Hippocampus Neurofibrillary Tangles                   | 17 | 0.16  |
| Ventricular Dilation | 6 | Loss of Neurons Dentate Nucleus                       | 8  | -0.16 |
| Ventricular Dilation | 6 | Diagnostic Delay                                      | 46 | -0.15 |
| Ventricular Dilation | 6 | Betz Cell Loss                                        | 35 | 0.15  |
| Ventricular Dilation | 6 | Loss of Neurons Substantia Nigra                      | 6  | -0.14 |
| Ventricular Dilation | 6 | Amygdala Neurofibrillary Tangles                      | 20 | 0.14  |
| Ventricular Dilation | 6 | Denervation                                           | 31 | 0.14  |
| Ventricular Dilation | 6 | Loss of Neurons Locus Ceruleus                        | 6  | -0.13 |
| Ventricular Dilation | 6 | Loss of Neurons Medulla                               | 15 | -0.13 |
| Ventricular Dilation | 6 | Paraspinal Muscle Fiber Atrophy                       | 26 | -0.13 |
| Ventricular Dilation | 6 | Lewy Body Formation                                   | 5  | -0.12 |
| Ventricular Dilation | 6 | Disease Duration                                      | 46 | -0.10 |
| Ventricular Dilation | 6 | FTD in Final Diagnosis                                | 3  | -0.10 |
| Ventricular Dilation | 6 | Gender (1 = m, 2 = f)                                 | 46 | -0.09 |
| Ventricular Dilation | 6 | Lewy Body Disease in Final Diagnosis                  | 2  | -0.08 |
| Ventricular Dilation | 6 | Neocortex Neurofibrillary Tangles                     | 2  | -0.08 |
| Ventricular Dilation | 6 | Loss of Neurons Spinal Cord                           | 11 | 0.08  |
| Ventricular Dilation | 6 | Loss of Neurons Amygdala                              | 2  | -0.08 |
| Ventricular Dilation | 6 | Diaphragm Atrophy                                     | 25 | -0.08 |
| Ventricular Dilation | 6 | Locus Ceruleus Pigmentary Incontinence                | 35 | -0.07 |
| Ventricular Dilation | 6 | Anterior Horn Cells Neurofibrillary Tangles           | 2  | -0.07 |
| Ventricular Dilation | 6 | Cingulate Cortex Neurofibrillary Tangles              | 2  | -0.07 |
| Ventricular Dilation | 6 | Frontal Cortex Neurofibrillary Tangles                | 6  | 0.07  |
| Ventricular Dilation | 6 | Loss of Neurons Anterior Horns                        | 20 | 0.06  |
| Ventricular Dilation | 6 | Familial ALS                                          | 1  | -0.05 |
| Ventricular Dilation | 6 | Infarcts                                              | 1  | -0.05 |
| Ventricular Dilation | 6 | Basal Ganglia Neurofibrillary Tangles                 | 1  | -0.05 |
| Ventricular Dilation | 6 | Dentate Nucleus of Cerebellum Neurofibrillary Tangles | 1  | -0.05 |
| Ventricular Dilation | 6 | Loss of Neurons Gyrus                                 | 1  | -0.05 |
| Ventricular Dilation | 6 | Occipital Cortex Neurofibrillary Tangles              | 1  | -0.05 |
| Ventricular Dilation | 6 | Parietal Cortex Neurofibrillary                       | 1  | -0.05 |



|                      |   |                                          |    |       |
|----------------------|---|------------------------------------------|----|-------|
|                      |   | Tangles                                  |    |       |
| Ventricular Dilation | 6 | Brain Mass                               | 46 | -0.05 |
| Ventricular Dilation | 6 | Substantia Nigra Neurofibrillary Tangles | 6  | 0.04  |
| Ventricular Dilation | 6 | Temporal Cortex Neurofibrillary Tangles  | 7  | -0.04 |
| Ventricular Dilation | 6 | Substantia Nigra Pigmentary Incontinence | 32 | -0.04 |
| Ventricular Dilation | 6 | Insular Cortex Neurofibrillary Tangles   | 10 | 0.04  |
| Ventricular Dilation | 6 | Loss Purkinje Cells                      | 39 | 0.03  |
| Ventricular Dilation | 6 | Locus Ceruleus Neurofibrillary Tangles   | 14 | 0.02  |
